# Supplementary material for: Industrially produced trans fat in popular foods in 15 countries of the former Soviet Union from 2015 to 2016: a market basket investigation
Source: PubMed Central journal article supplement — BMJ Open. 2019 Feb 15;9(2):e023184. doi: 10.1136/bmjopen-2018-023184 (PMC6398766; doi:10.1136/bmjopen-2018-023184), 2019-02-15
Supplement: bmjopen-2018-023184.draft_revisions.pdf [file bmjopen-2018-023184.draft_revisions.pdf]

# BMJ Open

BMJ Open is committed to open peer review. As part of this commitment we make the peer review history of every article we publish publicly available.

When an article is published we post the peer reviewers' comments and the authors' responses online. We also post the versions of the paper that were used during peer review. These are the versions that the peer review comments apply to.

The versions of the paper that follow are the versions that were submitted during the peer review process. They are not the versions of record or the final published versions. They should not be cited or distributed as the published version of this manuscript.

BMJ Open is an open access journal and the full, final, typeset and author-corrected version of record of the manuscript is available on our site with no access controls, subscription charges or pay-per-view fees (<http://bmjopen.bmj.com>).

If you have any questions on BMJ Open's open peer review process please email [info.bmjopen@bmj.com](mailto:info.bmjopen@bmj.com)

# BMJ Open

## **Industrially produced trans fat in popular foods in 2015-2016 in 15 countries of the former Soviet Union: a market basket investigation**

|                               |                                                                                                                                                 |
|-------------------------------|-------------------------------------------------------------------------------------------------------------------------------------------------|
| Journal:                      | <i>BMJ Open</i>                                                                                                                                 |
| Manuscript ID                 | bmjopen-2018-023184                                                                                                                             |
| Article Type:                 | Research                                                                                                                                        |
| Date Submitted by the Author: | 25-Mar-2018                                                                                                                                     |
| Complete List of Authors:     | Stender, Steen; Kobenhavns Universitet Det Natur- og Biovidenskabelige Fakultet, Nutrion excersize and sports                                   |
| Keywords:                     | Coronary heart disease < CARDIOLOGY, NUTRITION & DIETETICS, Health policy < HEALTH SERVICES ADMINISTRATION & MANAGEMENT, central asia trans fat |
|                               |                                                                                                                                                 |

SCHOLARONE™  
Manuscripts

Peer Review Only

1

24-03-2018

**Industrially produced *trans* fat in popular foods in 2015-2016 in 15 countries of the former Soviet Union: a market basket investigation**

Steen Stender, Professor, MD, DMSci

Steen Stender, Department of Nutrition, Exercise and Sports, University of Copenhagen,

Rolighedsvej 26, Frederiksberg, 1958 DK, Denmark

**Correspondence to: S Stender** [stender@nexs.ku.dk](mailto:stender@nexs.ku.dk)

**Telephone number: +45 35333162**

**Telephone number: +45 40258601**

**Key Words:** Coronary heart disease, Health policy, Nutrition, Soviet Union, *Trans* fat

**Word count: 3669** den 22-03-2018

**ABSTRACT**

**Objective:** To minimize the intake of industrial *trans* fat (I-TF) and thereby decrease the risk of coronary heart disease (CHD), several countries have implemented a legislative restriction on I-TF in foods. The objective of this study was to investigate the presence of I-TF in biscuits/cakes/wafers in 15 countries of the former Soviet Union. These countries all have a high coronary mortality compared with countries in Western Europe.

**Design:** Three large supermarkets were visited in each of the 15 capitals in 2015 or 2016. Pre-packaged biscuits/cakes/wafers were bought if the list of ingredients disclosed that the product contained more than 15 grams of total fat per 100 grams of product and if partially hydrogenated fat or a similar term, including margarine, refined fat or confectionary fat, were mentioned. Samples of the foods were subsequently analysed for total fat and TF.

**Results:** Some 994 products had more than 2% of total fat as I-TF (illegal in Denmark). In Armenia, 91 different products had a mean value (SD) of 21(11) % of the fat as I-TF. In Estonia, there were 8 products with 14(10) % of the fat as I-TF. The other 13 countries had values in between. In several countries a major part of the products were imported from Russia and Ukraine. Many of these products had a readable production date and a best before date. The mean shelf life (SD) of 673 packages was 218 (75) days. The % TF in the fat of products produced in Russia and in Ukraine in relation to the date of production declined significantly during the 2 years collection period.

**Conclusions:** The findings suggest that I-TF is used in popular foods in all 15 countries of the former Soviet Union. It opens a possibility for reduction of the high coronary mortality in these countries.

(Words 299) 20-03-2018

### Strengths and limitation of this study

- A strength of this study is that the presence of industrial *trans* fat in popular foods for the first time is systematically investigated in each of the 15 countries of the former Soviet Union that all have a high coronary mortality and a population of nearly 300 million.
- A limitation of the study is that only pre-packaged biscuits/cakes/wafers were investigated for *trans* fat and no other food groups such as shortenings and margarines and no un-packaged foods such as baked goods, sweet rolls, pastries, buns and even un-packaged biscuits/cakes/wafers were investigated.
- Another limitation is that the average daily intake of *trans* fat was not measured in any subgroups of the populations, but instead was inferred from the availability of popular foods with high amounts of *trans* fat in large supermarkets.

### INTRODUCTION

High amounts of *trans* fat (TF) in food originate from the industrial hydrogenation of edible oils. Compared to non-hydrogenated oils, fats containing industrially produced *trans* fat (I-TF) are solid at room temperature, have some technical advantages for food processing, and prolong the shelf life of products. TF are not synthesized in the human body and are not required in the diet, but is absorbed and metabolized. I-TF can be found at varying amounts in biscuits, pastries, margarine, spreads, confectionary creams and fillings and fried foods such as potato crisps. Fat from ruminants, for instance in dairy products, contains up to 5 % TF, which is considerably lower than the up to 50% TF that may be present in partially hydrogenated fat for human food.

1  
2  
3  
4 Observational studies suggest an association between dietary intake of I-TF and increased risk of  
5 coronary heart disease (CHD).<sup>1</sup> The association is further corroborated by an association between  
6 plasma TF level and CHD.<sup>2</sup> Plausible mechanisms for the association involving an increase in  
7  
8 plasma LDL-cholesterol<sup>3</sup> and unfavourable “beyond lipid effects” on inflammatory cells important  
9  
10 for atherogenesis<sup>4,5</sup> suggest a causal relationship, even in the absence of randomized studies with  
11  
12 hard clinical endpoints.<sup>6</sup> Based on the available evidence, Denmark in 2004 and some counties in  
13  
14 New York State, USA in 2007, legally restricted the use of I-TF in the diet. The fewer CHD events,  
15  
16 beyond temporal trends, in Denmark and in counties in New York State, strongly suggest that I-TF  
17  
18 in the diet promotes CHD and a restriction in its use reduces CHD.<sup>7-9</sup> What remains to be explored  
19  
20 is to what extent I-TF still is used in popular foods in countries with high rates of CHD-mortalities.  
21  
22  
23  
24

25 The 15 countries of the former Soviet Union all have an extraordinarily high rate of CHD  
26  
27 mortality compared with countries in Western Europe.<sup>10</sup> In a systematic analysis<sup>11</sup>, including 266  
28  
29 country-specific nutrition surveys, the average consumption of TF in 2010 in Central Asia and  
30  
31 Eastern Europe that together include the 15 countries of the former Soviet Union, for adults of more  
32  
33 than 20 years, were 0.9% of total energy intake; this corresponds to approximately 2.5 gram TF per  
34  
35 day per adult and is less than the 1% of total energy percent recommended by WHO. The  
36  
37 consumption level was found stable since 1990. Among the world’s 21 different regions Central  
38  
39 Asia and Eastern Europe were placed as number 5 and 8, respectively with the lowest average  
40  
41 consumption of TF, suggesting that intake of TF is a minor health problem in these countries.  
42  
43 However, the investigators mention the relatively limited data availability on TF consumption in  
44  
45 most nations compared with other major dietary factors.<sup>11</sup> Furthermore a low average intake of TF  
46  
47 in a nation does not exclude a high intake of TF in subgroups of the population if popular foods  
48  
49 contain high amounts of I-TF.  
50  
51  
52

53 Some recent Russian studies, with an abstract in English, mention the harmful effect on health of  
54  
55  
56  
57  
58  
59  
60

1  
2  
3  
4 dietary I-TF and pledge for a removal of I-TF from margarine “to preserve the health of Russia’s  
5 population”.<sup>12,13</sup> A study from Estonia reports about high I-TF in blended spreads, margarines and  
6 shortenings bought in the Estonian retail market in 2011.<sup>14</sup> Additionally, technical reports from the  
7 WHO find several types of street foods with high amounts of TF in Dushanbe, Tajikistan,  
8 April/May 2016, and in Bishkek, Kyrgyzstan, June/July 2016.<sup>15</sup> In a recent systematic review of TF  
9 intake and its dietary sources in general populations worldwide based on data from 29 different  
10 countries and a demonstration of a substantial reduction in I-TF in many countries, none of the  
11 countries of the former Soviet Union were included, either for the intake of the general population  
12 or for the study’s secondary research question about the composition of fat in biscuits, because of  
13 the lack of data.<sup>16</sup> Apparently, there is a pronounced scarcity of newer internationally published  
14 data about I-TF in foods in most of these countries. The purpose of the present study was to  
15 investigate the presence of I-TF in popular foods in the 15 countries of the former Soviet Union by  
16 a newly developed market basket method.<sup>17</sup>

## 34 **METHODS**

### 36 **Purchase of biscuits/cakes/wafers in supermarkets**

37  
38 By using Wikipedia and local tourist information offices, I identified three large supermarkets in  
39 each capital, preferably chain supermarkets with many large shops across the country.<sup>18</sup> Pre-  
40 packaged biscuits/cakes/wafers were chosen as the food to be investigated for TF in this study  
41 because these types of foods are frequently consumed, easily accessible, and transportable at  
42 ambient temperature. Furthermore, these foods traditionally contain I-TF-rich, partially  
43 hydrogenated vegetable oils as their major lipid ingredient, and I-TF has previously been found in  
44 these foods in high concentrations in some countries in Eastern Europe.<sup>19-21</sup> The packages of  
45  
46  
47  
48  
49  
50  
51  
52  
53  
54  
55  
56  
57  
58  
59  
60

biscuits/cakes/wafers were obtained in each supermarket by systematically examining the labels of the products. Packages were purchased if they met the following criteria on the list of ingredients:

- Total fat content was equal to or exceeded 15 g per 100 g of product.
- Listed one or more of the terms: partially hydrogenated fat, hydrogenated fat, hardened fat, refined fat, confectionary fat, deodorized fat, all-purpose fat or margarine.
- If the list of ingredients indicated *trans* fat > 0 g, these foods were also included.
- Packages with the term ‘unhydrogenated fat’ or ‘fully hydrogenated fat’ or ‘no *trans* fat’ were not purchased.

If the same package with the same barcode number was found in more than one of the three different supermarkets in the same capital, only the package with the most recent production date was included in the study. Each package was subsequently labelled with an ID-number, and duplicate samples each of approximately 50 grams of the product were taken for analysis. The barcode number, the name of the producer, the country of origin and, if available, the best before date as well as the production date were registered, and the empty packages were stored. The first 2 digits (sometimes three digits) in the barcode number identify the country or economic region numbering authority which assigned the manufacturer code. The Russian Federation uses the code 46, Ukraine the code 482. The manufacturer code is the next 5 digits followed by the product code, consisting of 5 digits. The last digit is the check digit.<sup>22</sup>

To investigate to what extent the presence of biscuits/cakes/wafers in the capital differed from other parts of the country, biscuits/cakes/wafers were obtained in 3 different supermarkets in each of 2 different regions of the 2 large countries Uzbekistan and Russia: in Uzbekistan also in the second largest city Samarkand (0.4 million inhabitants and approximately 300 km from Taskent) and in Russia also in Sct. Petersburg (5.2 million inhabitants and approximately 800 km from



1  
2  
3  
4 Moscow). The third large country was Ukraine. In its capital Kiev, 3 other large supermarkets were  
5  
6 visited (Kiev-2) in addition to the first 3 that were visited (Kiev-1).  
7  
8  
9

### 10 **Analysis of TF**

11  
12 The samples from the various countries were analysed successively and in the order they were  
13  
14 obtained. Samples obtained in the first countries that we visited (Moldova, Belarus, Georgia,  
15  
16 Armenia and Kyrgyzstan) were all analysed for TF. In the other countries that were visited later  
17  
18 some packages were obtained with the same barcode number, and the same visual appearance and  
19  
20 list of ingredients as on packages where the samples already were analysed. A sample from the  
21  
22 newly found package was analysed only if the best before date on that package exceeded the best  
23  
24 before date by more than 12 months on a package that already had been analysed. Otherwise, the  
25  
26 TF values were carried forward to the new package.  
27  
28

29  
30 For analysis the foods were homogenized, and the fatty acid content was analysed using gas  
31  
32 chromatography on a 66-m highly polar capillary column, using a modification of the AOAC  
33  
34 006·06 method. All analytical work on samples was conducted by Microbac Laboratories in  
35  
36 Warrendale, Pennsylvania, USA, an ISO-17025-certified laboratory. The measurement cannot  
37  
38 distinguish I-TF from ruminant TF. If butter as a ruminant fat has been used in the product in  
39  
40 addition to partially hydrogenated vegetable oil, some of the TF in the product may be derived from  
41  
42 butter that on average contains a few percent of the fat as TF. In this paper, the term I-TF is used  
43  
44 even though a minor portion in certain products may be TF derived from ruminant fat.  
45  
46  
47  
48

### 49 **Statistical analysis**

50  
51  
52  
53  
54  
55  
56  
57  
58  
59  
60

1  
2  
3  
4 For each country, simple linear regression models were used to describe the change in %TF as a  
5 function of shelf life and over time recorded as date of production. The statistical software R was  
6 used (R Core Team, 2017).  
7  
8  
9

## 10 11 12 13 14 15 **RESULTS**

16  
17 The number of different packages obtained in 3 different supermarkets in each of the 15 capitals  
18 totalled 1332. Samples from 1068 packages were analysed, and TF values for each of the remaining  
19 264 packages were taken from a similar package with an identical barcode but obtained earlier in  
20 another country and already analysed. Some 994 samples had more than 2% of the fat as TF. The  
21 different products in each country were ranked according to I-TF level, expressed as grams per 100  
22 g of the product (figure 1). This latter value tells how much TF the consumer gets when 100 grams  
23 of the product is consumed. Each horizontal bar in each panel represents a product with more than  
24 2% of the fat as TF. The number of these products is shown together with the number of packages,  
25 given in parenthesis that fulfilled the inclusion criteria. The products depicted in each panel are all  
26 different, but the same product may appear in the panels for two or more countries. The mean  
27 values of the percentages of fat that were I-TF in each of the countries, together with the SD and  
28 maximum values are shown. These percentages are of interest for food producers and for food  
29 authorities because they describe the fat that has been used in the food. In some products obtained  
30 in Armenia and in Kyrgyzstan about 50% of the fat was I-TF. (figure 1)  
31  
32  
33  
34  
35  
36  
37  
38  
39  
40  
41  
42  
43  
44  
45  
46

47 In the second largest city, Samarkand, in Uzbekistan, 29% of the packages were similar based on  
48 the barcode number to the packages found in the capital, Taskent. In Sct Petersburg, Russia, 30%  
49 were similar to the products found in Moscow, and in Kiev-2, the second region of collection, 48%  
50 were similar to the packages found in the first region of collection, Kiev-1. Even though most  
51  
52  
53  
54  
55  
56  
57  
58  
59  
60

1  
2  
3  
4 products were different in the 2 different regions of the same country, the panels that reflect the  
5 availability of biscuits/cakes/wafers with more than 2% TF in the fat are rather similar. (figure 2)  
6  
7 This suggests that the panels presented for each country in figure 1 represent a pattern found  
8  
9 elsewhere in the country and not only in the capital.  
10  
11

12 For the 994 products with more than 2% of the fat as I-TF and obtained in the 15 capitals of the  
13 former Soviet Union, 52% were produced in Russia, 26% in Ukraine, 13% in own country, and 8 %  
14 in some other countries for instance Poland and Bulgaria. For the products produced in Russia, 85%  
15 were obtained outside Russia, in the other countries of the former Soviet Union combined, not  
16 including Ukraine and Lithuania. For the products produced in Ukraine, 69% were obtained outside  
17 Ukraine in the other countries, excluding Russia. The import patterns of pre-packaged  
18 biscuits/cakes/wafers differed from country to country exemplified by the patterns observed for  
19 Uzbekistan and Kazakhstan. (figure 3) The concentrations in grams of TF per 100 grams of product  
20 are in a panel for each of the two countries, depicted with each product placed together with other  
21 products from the same country of origin. The numbers and the mean values of the concentrations  
22 of TF in the fat of pre-packaged biscuits/cakes/wafers produced in Russia and in Ukraine but  
23 obtained in the various countries of the former Soviet Union are shown in table 1. All of the 75  
24 different products with more than 2% of the fat as TF obtained in Moscow were produced in Russia,  
25 and 81 of the 83 different products obtained in Kiev-1 were produced in Ukraine. The same pattern  
26 was seen in Sct Petersburg, Russia and in Kiev-2, Ukraine, respectively. In each of the countries,  
27 except for the 3 Baltic countries and Belarus, a majority of the products were imported from Russia  
28 and Ukraine.  
29  
30  
31  
32  
33  
34  
35  
36  
37  
38  
39  
40  
41  
42  
43  
44  
45  
46  
47  
48

49 The analysis of shelf life was only conducted for packages produced in Russia and Ukraine, as they  
50 were the main exporters to most of the other countries, and in many of the products, especially from  
51 Russia, the length of the shelf life appeared on the package. This is in contrast to pre-packaged  
52  
53  
54  
55  
56  
57  
58  
59  
60

1  
2  
3  
4 biscuits/cakes/wafers produced in most countries in the more western part of Europe. These  
5  
6 packages only have the best before date and the shelf life of the product is usually hidden for the  
7  
8 final customer. Products with less than 2% TF in the fat had shelf lives of approximately 200 days,  
9  
10 comparable to products with a much higher concentration of TF (table 2). The most frequent length  
11  
12 of shelf life was 6 months, whether the products were produced in Russia or in Ukraine. The slope  
13  
14 of the regression line between shelf life and % TF was significantly negative for Ukraine  
15  
16 ( $p<0.0001$ ) and significantly positive for Russia ( $p<0.0001$ ). Taken together, the data did not  
17  
18 support the conclusion that the higher the TF in the product, the longer the shelf life.  
19  
20

21  
22 Since the samples of biscuits/cakes/wafers were collected between January 2015 and  
23  
24 January 2017, and many were produced in Russia and in Ukraine, I have depicted the  
25  
26 % TF of fat in the products in relation to the date of production to show a trend in the  
27  
28 two countries in their use of fat with high amounts of TF in these products. The TF  
29  
30 concentrations decrease significantly during the 2 years in Russia ( $p<0.0001$ ) as well  
31  
32 as in Ukraine ( $p<0.0001$ ), but the decrease did not differ significantly between the 2  
33  
34 countries ( $p=0.12$ ) (figure 4).  
35  
36  
37  
38

## 39 DISCUSSION

### 40 41 **The principal findings**

42  
43 The findings of this study clearly demonstrate that in 2015-2017 I-TF was present in  
44  
45 high concentrations in many different brands of biscuits/cakes/wafers in the countries  
46  
47 of the former Soviet Union, except for the 3 Baltic countries. This information was not  
48  
49 previously available and may be of relevance because of the high coronary mortality in  
50  
51 these countries. In 3 of the countries- Russia, Ukraine and Belarus, by far most of the  
52  
53  
54  
55  
56  
57  
58  
59  
60

11

1  
2  
3  
4 products are produced in the country itself. For the other countries, except for the 3  
5  
6 Baltic countries, imports from food producers in Russia and Ukraine make up a major  
7  
8 part of their products with high amounts of TF.  
9

10  
11 In all of the shops there were more packages that did not have the included terms on  
12  
13 the label than packages that had one or more of the terms on the label. This suggests  
14  
15 that there are plenty of biscuits/cakes/wafers without I-TF available in all of the 45  
16  
17 supermarkets. Of the 1332 packages that fulfilled the inclusion criteria and were  
18  
19 bought, 335 (25%) of the products had less than 2% of the fat as TF. This suggests that  
20  
21 the inclusion criteria are rather broad in relation to the presence of TF and/or that the  
22  
23 terms on the list of ingredients do not always reflect the composition of the fat in the  
24  
25 product.  
26  
27

28  
29 The amounts of TF per 100 grams of product bought in Moscow did not exceed 6  
30  
31 grams (figure 1), whereas several products produced in Russia, but obtained in the  
32  
33 other countries had more than 6 grams per 100 grams, for instance in Uzbekistan and  
34  
35 Kazakhstan (figure 3). The same is seen for the average concentration of I-TF in  
36  
37 products obtained in Russia, with mean value and SD of 10(6) %, compared with  
38  
39 considerable higher values in Russian products obtained in the other countries (table  
40  
41 1). The same pattern is seen for products bought in Ukraine, compared with products  
42  
43 produced in Ukraine but obtained in some of the other countries (table 1). The  
44  
45 products obtained in Russia were bought more than a year later than the products  
46  
47 produced in Russia but obtained in the other countries. This was also the case for the  
48  
49 products obtained in Ukraine and outside Ukraine. Some of the difference may be due  
50  
51 to a decrease in the use of I-TF during the time period.  
52  
53  
54  
55  
56  
57  
58  
59  
60

I-TF has been used in foods such as biscuits/cakes/wafers also because it apparently prolongs the shelf life of the foods. This is presently not supported by the findings that 186 products produced in Russia with a shelf life of 6 months had TF concentrations of 11 (7)% mean value (SD) and 37 products with a shelf life of 12 months, also had TF concentrations of 11 (7)%. The corresponding values from products produced in Ukraine were for 86 products with shelf life of 6 months 20 (9) % and for 30 products with shelf life of 12 months 10 (6) %.

Based on the plasma concentrations of TF in nationally representative groups in 2010 in the USA (3 years after the introduction of mandatory labelling of TF on pre-packaged foods and in spite of a nearly 50% lower average TF-concentration in plasma), there is still a subgroup with very high TF concentrations, reflecting a subgroup in the general population with a high consumption of TF.<sup>3</sup> A vicious cycle apparently occurs: as long as foods with high amounts of I-TF are present in the shops, some consumers will buy them, and as long as they are bought, the foods will be available. This may also be the case in the countries of the former Soviet Union. Despite a decline in the average intake of I-TF in many countries in Western Europe,<sup>16</sup> in 2015 the WHO estimated that millions of Europeans still consume TF at levels that significantly increase their risk for CHD.<sup>23</sup> The findings reported in the present investigation confirm this estimate.

### **Strength and weaknesses of the study**

Strengths of this study include that the same procedure was used to obtain popular foods in large supermarkets in all 15 countries of the former Soviet Union, and in the

1  
2  
3  
4 3 largest countries in two different regions and that the samples were analysed for TF  
5  
6 in the same laboratory. A limitation of this study is that no other food groups (such as  
7  
8 shortenings and margarines) and no un-packaged foods (such as baked goods, sweet  
9  
10 rolls, pastries, buns and even un-packaged biscuits/cakes/wafers) were investigated.  
11  
12 However, the presence of high concentrations of I-TF in biscuits/cakes/wafers may be a  
13  
14 sign that I-TF is used in other foods as well. Another limitation is that the average  
15  
16 daily intake of I-TF was not measured in any subgroups of the populations, but  
17  
18 instead was inferred from the availability of popular foods with high amounts of I-TF  
19  
20 in large supermarkets. The competition for shelf space in supermarkets is usually  
21  
22 fierce. If products do not sell, they are rapidly replaced by other products. A relevant  
23  
24 subgroup for intake studies would be the consumers who buy pre-packaged  
25  
26 biscuits/cakes/wafers.  
27  
28  
29  
30  
31  
32

### 33 **Legislation and industrial *trans* fat in foods**

34  
35  
36 In the USA in 2015, the FDA revoked the previous GRAS (Generally Recognized As  
37  
38 Safe) status of partially hydrogenated oils - a step that may remove I-TF from food  
39  
40 production in the USA before July 2018, and Canada is following suit.<sup>24</sup> In 2009,  
41  
42 Austria and Switzerland introduced a legislative ban similar to the Danish ban from  
43  
44 2004, followed by Iceland in 2011, Hungary and Norway in 2014, and Latvia, Georgia,  
45  
46 Lithuania, and Slovenia between 2016 and 2018. Other Eastern European countries  
47  
48 including Russia may be on their way to I-TF legislation.<sup>13,25,26</sup> The European Union  
49  
50 published a report in 2015, originally commissioned in 2011, that “indicates the need to  
51  
52 continue and expedite work in this area by collecting more information”.<sup>27</sup> In the  
53  
54  
55  
56  
57  
58  
59  
60

1  
2  
3  
4 WHO-Europe investigation of the various ways to reduce I-TF in foods, it was  
5  
6 concluded that establishing a legal limit for the content of I-TF in foods is potentially  
7  
8 the only available option that reduces the risks associated with I-TF faced by all  
9  
10 consumers and doing so may contribute to reducing inequalities. Such a policy is  
11  
12 unique in its combination of efficacy, cost-effectiveness and low potential for negative  
13  
14 impact. Removing I-TF from the food supply is possibly one of the most  
15  
16 straightforward public health interventions for reducing risk of CHD.<sup>23</sup> If the trend of  
17  
18 using fat with lower amounts of I-TF continues as observed (figure 4) or even  
19  
20 accelerates among food factories in Russia and Ukraine that produce  
21  
22 biscuits/cakes/wafers, the intake of I-TF in the 2 large countries may decrease, but in  
23  
24 addition also the intake of I-TF among millions of inhabitants in the adjacent  
25  
26 countries.<sup>18</sup>  
27  
28  
29  
30  
31  
32

### 33 **Future research and implications for policy makers**

34  
35  
36 It is of considerable interest whether coronary mortality and admission rates for  
37  
38 CHD and stroke will change in countries that have recently introduced legislation that  
39  
40 restricts the use of I-TF or intend to do so in the near future, in the same way as it  
41  
42 was observed in Denmark and in certain counties in New York State.<sup>6,9</sup>  
43  
44

45  
46 On the basis of data from 2009 to 2011, there is a fivefold difference in age-  
47  
48 standardized mortality rates of CHD between some countries in Western Europe and  
49  
50 countries in Central and Eastern Europe, with Central Asia having the highest rates.<sup>10</sup>  
51  
52 Central Eastern Europe and Central Asia were the world regions with the highest  
53  
54 current age-standardized cardiovascular mortality rates, which are more than twice  
55  
56  
57  
58  
59  
60



1  
2  
3  
4 those of Latin America and the Caribbean.<sup>29</sup> The present study demonstrates a presence  
5  
6 of I-TF in popular foods in the countries of the former Soviet Union with excessively  
7  
8 high CHD mortality. Restriction of the use of I-TF in foods, either voluntarily by food  
9  
10 producers or more efficiently by legislation, may be an easily implemented first  
11  
12 strategy for the reduction of cardiovascular diseases in these countries.  
13  
14  
15

## 16 17 REFERENCES

- 18  
19  
20 1. de Souza RJ, Mente A, Maroleanu A, et al. Intake of saturated and trans unsaturated  
21  
22 fatty acids and risk of all cause mortality, cardiovascular disease, and type 2 diabetes:  
23  
24 systematic review and meta-analysis of observational studies. *BMJ* 2015; 351: h3978.  
25  
26 doi:101136/bmj.h3978.  
27  
28
- 29  
30 2. Li H, Zhang Q, Song J, et al. Plasma trans-fatty acids levels and mortality: a cohort  
31  
32 study based on 1999-2000 National Health and Nutrition Examination Survey  
33  
34 (NHANES). *Lipids Health Dis* 2017; 16: 176.doi:10.1186/s12944-017-0567-6.  
35  
36  
37
- 38  
39 3. Yang Q, Zhang Z, Loustalot F, et al. Plasma *trans*-Fatty Acid Concentrations  
40  
41 Continue to Be Associated with Serum Lipid and Lipoprotein Concentrations among  
42  
43 US Adults after Reductions in *trans*-Fatty Acid Intake. *J Nutr* 2017; 147:896–07.  
44  
45  
46
- 47  
48 4. Nagasawa Y, Shinke T, Toh R, et al. The impact of serum trans fatty acids  
49  
50 concentration on plaque vulnerability in patients with coronary artery disease:  
51  
52 Assessment via optical coherence tomography. *Atherosclerosis* 2017  
53  
54 <http://dx.doi.org/10.1016/j.atherosclerosis.2017.06.922>.  
55  
56  
57  
58  
59  
60

- 1  
2  
3  
4 5. Hirata Y, Takahashi M, Kudoh Y, et al. Trans-Fatty acids promote proinflammatory  
5 signaling and cell death by stimulating the apoptosis signal-regulating kinase 1  
6 (ASK1)-p38 pathway. *J Biol Chem*. 2017; 292: 8174–85 doi:  
7  
8 10.1074/jbc.M116.771519.  
9  
10  
11  
12  
13
- 14 6. Brouwer IA, Wanders AJ, Katan MB. *Trans fatty acids and cardiovascular health:*  
15 *research completed? Eur J Clin Nutr* 2013; 67:541–47.  
16  
17  
18  
19  
20
- 21 7. Restrepo BJ, Rieger M. Denmark's Policy on Artificial Trans Fat and Cardiovascular  
22 Disease. *Am J Prev Med* 2016; 50: 69–76.  
23  
24  
25  
26  
27
- 28 8. Restrepo BJ, Rieger M. Trans fat and cardiovascular disease mortality: Evidence from  
29 bans in restaurants in New York. *J. Health Econ* 2016; 45: 176–196  
30  
31  
32  
33
- 34 9. Brandt EJ, Myerson R, Perrailon MC, et al. Hospital Admissions for  
35 Myocardial Infarction and Stroke Before and After the Trans-Fatty Acid  
36 Restrictions in New York. *JAMA Cardiol* 2017; 2: 627–634.  
37  
38  
39  
40  
41  
42
- 43 10. Nichols M, Townsend N, Scarborough P, et al. Cardiovascular disease in Europe  
44 2014: epidemiological update. *Eur Heart J* 2014; 35: 2950–59  
45  
46  
47  
48
- 49 11. Micha R, Khatibzadeh S, Shi P, et al. Global, regional, and national consumption  
50 levels of dietary fats and oils in 1990 and 2010: a systematic analysis including 266  
51  
52  
53  
54  
55  
56  
57  
58  
59  
60

- 1  
2  
3  
4 country-specific nutrition surveys. *BMJ* 2014; 348: g2272 doi:  
5  
6 10.1136/bmj.g2272  
7  
8  
9
- 10  
11 12. Perova NV, Metel'skaia VA, Boytsov SA.[Trans isomers of unsaturated  
12 fatty acids increase the risk of atherosclerosis-related circulatory system  
13 diseases].[Article in Russian]. *Ter Arkh.* 2013; 85: 113-7.  
14  
15
- 16  
17  
18  
19 13. Boytsov SA, Perova NV. To lower trans fatty acid intake as an important  
20 condition for the reduction of cardiovascular Mortality(Article)  
21 *Profilakticheskaya Meditsina* 2017; 20: 4-9.  
22  
23
- 24  
25  
26 14. Meremäe K, Roasto M, Kuusik S, *et al.* Trans Fatty Acid Contents in  
27 Selected Dietary Fats in the Estonian Market. *J Food Sci.* 2012; 77: 163-8.  
28  
29  
30
- 31  
32  
33 15. FEEDcities project. The food environment description in cities in  
34 Eastern Europe and Central Asia - Tajikistan and Kyrgyzstan.  
35 Technical report, WHO Europe, June 2017 and August 2017  
36  
37 [http://www.euro.who.int/\\_data/assets/pdf\\_file/0012/353001/FEED-TJK-](http://www.euro.who.int/_data/assets/pdf_file/0012/353001/FEED-TJK-report.pdf?ua=1)  
38 [report.pdf?ua=1](http://www.euro.who.int/_data/assets/pdf_file/0012/353001/FEED-TJK-report.pdf?ua=1)  
39  
40  
41  
42  
43 [http://www.euro.who.int/\\_data/assets/pdf\\_file/0006/351996/FEED-KGZ-report-web-](http://www.euro.who.int/_data/assets/pdf_file/0006/351996/FEED-KGZ-report-web-new.pdf?ua=1)  
44 [new.pdf?ua=1](http://www.euro.who.int/_data/assets/pdf_file/0006/351996/FEED-KGZ-report-web-new.pdf?ua=1)  
45 (Accessed Mar 2018).  
46  
47
- 48 16. Wanders AJ, Zock PL, Brouwer IA. Trans Fat Intake and Its Dietary Sources in  
49 General Populations Worldwide: A Systematic Review. *Nutrients.* 2017; 9,840;  
50  
51 doi:10.3390/nu9080840.  
52  
53  
54  
55  
56  
57  
58  
59  
60

- 1  
2  
3  
4 17. Stender S, Astrup A, Dyerberg J. A trans European Union difference in the decline in  
5 trans fatty acids in popular foods: a market basket investigation. *BMJ Open* 2012; 17;2  
6 e000859. doi: 10.1136/bmjopen-2012-000859.  
7  
8  
9  
10  
11  
12  
13 18. [https://en.wikipedia.org/wiki/Post-Soviet\\_states#General\\_statistics](https://en.wikipedia.org/wiki/Post-Soviet_states#General_statistics)  
14  
15 (Accessed Mar 2018).  
16  
17  
18  
19 19. Kravic SZ, Suturovic ZJ, Svarc-Gajic JV, *et al.* Fatty acid composition including  
20 *trans*-isomers of Serbian biscuits. *Hem Ind* 2011; 65:139–46.  
21  
22  
23  
24  
25  
26 20. Stender S, Astrup A, Dyerberg J. Tracing artificial *trans* fat in popular foods in  
27 Europe: a market basket investigation. *BMJ Open* 2014; 4: e005218.  
28  
29  
30  
31  
32  
33 21. Stender S, Astrup A, Dyerberg J. Artificial trans fat in popular foods in 2012  
34 and in 2014: a market basket investigation in six European countries. *BMJ*  
35 *Open*. 2016; 6: e010673.  
36  
37  
38  
39  
40  
41  
42  
43 22. [https://da.wikipedia.org/wiki/International\\_Article\\_Number\\_\(EAN\)](https://da.wikipedia.org/wiki/International_Article_Number_(EAN))  
44  
45 (Accessed Mar 2018).  
46  
47  
48  
49 23. Eliminating trans fats in Europe – A policy brief ( 2015)  
50  
51  
52  
53  
54  
55  
56  
57  
58  
59  
60

1  
2  
3  
4 7  
8 13  
14  
15 19  
20  
21 24  
25 28  
29 32  
33 36  
37 40  
41 44  
45 48  
49 52  
53 56  
57 60

24. FDA Cuts Trans Fat in Processed Foods

<http://www.fda.gov/ForConsumers/ConsumerUpdates/ucm372915.htm>

(Accessed Mar 2018).

25. Vučić V, Arsić A, Petrović S, *et al.* Trans fatty acid content in Serbian margarines:

Urgent need for legislative changes and consumer information. *Food Chem* 2015; **185**:  
437–40.

26. Wilczek MM, Olszewski R, Krupienicz A. *Trans*-Fatty Acids and Cardiovascular  
Disease: Urgent Need for Legislation. *Cardiology*. 2017; 138:254–58.

27. Report from the Commission to the European parliament and the Council regarding  
trans fats in foods and in the overall diet of the Union population. (03-12-2015)

[http://ec.europa.eu/dgs/health\\_food-  
safety/dyna/enews/enews.cfm?al\\_id=1650](http://ec.europa.eu/dgs/health_food-safety/dyna/enews/enews.cfm?al_id=1650)

(Accessed Mar 2018).

28. Inception Impact Assessment; Initiative to limit industrial trans fats  
intakes in the EU.

[http://ec.europa.eu/smart-regulation/roadmaps/docs/2016\\_sante\\_143\\_trans\\_fats\\_en.pdf](http://ec.europa.eu/smart-regulation/roadmaps/docs/2016_sante_143_trans_fats_en.pdf)

(Accessed Mar 2018).

29. Barquera S, Pedroza-Tobías A, Medina C, *et al.* Global Overview of the Epidemiology of Atherosclerotic Cardiovascular Disease. *Arch Med Res* 2015; **46**: 328–38

## LEGENDS

### Figure 1

Amounts of industrially produced *trans* fat (I-TF) in 100 grams of pre-packaged biscuits/cakes/wafers purchased in 2015-2016 in three supermarkets in each of the 15 capitals. Each bar in a panel represents a unique product bought in that capital, i.e., none of the products in a given panel had the same barcode number. N is the number of different products with more than 2% TF of the total fat content. (N) is the number of packages that fulfilled the inclusion criteria. X is the mean value and the standard deviation of the percentages of I-TF in the total fat of the N products, M is the maximal value of I-TF as percent of total fat. Each bar in all of the 15 panels has the same thickness, which means that the area of the bars is comparable between the different panels.

### Figure 2

The legend for this figure is similar to the legend for Figure 1. The 4 upper panels show the result for 2 of the capitals and 2 other large cities in the same country. The lowest 2 panels give the results

21

1  
2  
3  
4 from the purchase in 3 large supermarkets in Kiev (Kiev-1) and in 3 other large supermarkets in the  
5  
6 same city (Kiev-2).  
7  
8  
9

**Figure 3**

10  
11  
12 Amounts of industrially produced *trans* fat (I-TF) in 100 grams of pre-packaged  
13  
14 biscuits/cakes/wafers, obtained in Uzbekistan and in Kazakhstan respectively with each product in  
15  
16 the panel placed together with other products from the same country of origin.  
17  
18  
19  
20

**Figure 4**

21  
22  
23 Date of production and I-TF as percent of total fat for pre-packaged biscuits/cakes/wafers, produced  
24  
25 in Russia or Ukraine, respectively, and obtained in the countries of the former Soviet Union  
26  
27 between January 2015 and January 2017. Products obtained in Samarkand, Sct Petersburg and Kiev  
28  
29 2 were included if the products had their own *trans* fat analysis. Only products with more than 2%  
30  
31 of the fat as I-TF were included.  
32  
33  
34  
35

**Table 1**

36  
37  
38 Country of origin for pre-packaged biscuits/cakes/wafers with more than 2% of the fat as I-TF  
39  
40 obtained in the 15 countries of the former Soviet Union.  
41  
42  
43  
44

**Table 2**

45  
46  
47 Shelf life of pre-packaged biscuits/cakes/wafers produced in Russia or in Ukraine and obtained in  
48  
49 the countries of the former Soviet Union between January 2015 and January 2017.  
50  
51  
52  
53  
54  
55  
56  
57  
58  
59  
60

**Footnotes****Contributors:**

SS was responsible for the concept design of the study, for collection of food items, registration, and labelling, and writing the manuscript. SS is the manuscripts guarantor.

**Funding:** This work was supported by Jenny Vissings Foundation, University of Copenhagen and Department of Clinical Biochemistry, Copenhagen University Hospital, Gentofte, Denmark.

**Role of the funding source**

The sponsors of the study had no role in the study design, data collection, analysis, and interpretation, the writing of the report, or the decision to submit the article for publication. The corresponding author had full access to all the data for the study and had final responsibility for the decision to submit the manuscript for publication.

**Competing interests:**

None declared

**Ethics approval**

The study does not require an approval from the Ethics committee

**Acknowledgements:**

The authors acknowledge the support from Jenny Vissings Foundation, University of Copenhagen and the Department of Clinical Biochemistry, Copenhagen University Hospital, Gentofte, Denmark.



**Copyright statement:**

The Corresponding Author has the right to grant an exclusive licence on a worldwide basis to the BMJ Publishing Group LID Publishers and its licensees in perpetuity, in all forms, formats and media (whether known now or created in the future), to i) publish, reproduce, distribute, display and store the Contribution, ii) translate the Contribution into other languages, create adaptations, reprints, include within collections and create summaries, extracts and/or, abstracts of the Contribution, iii) create any other derivative work(s) based on the Contribution, iv) to exploit all subsidiary rights in the Contribution, v) the inclusion of electronic links from the Contribution to third party material where-ever it may be located; and, vi) licence any third party to do any or all of the above.”

**Transparency declaration:**

Steen Stender (the manuscript’s guarantor) affirms that the manuscript is an honest, accurate, and transparent account of the study being reported; that no important aspects of the study have been omitted; and that any discrepancies from the study as planned (and, if relevant, registered) have been explained.

**Data sharing statement:**

The data used to construct figures 1-5, tables 1 and 2, and supplementary table A and B can be shared by e-mailing Steen Stender

| <b>Table 1</b> Country of origin for pre-packaged biscuits/cakes/wafers with more than 2% of the fat as <i>trans</i> fat (TF) obtained in the various countries. |  |  |  |  |  |  |  |  |  |  |
|------------------------------------------------------------------------------------------------------------------------------------------------------------------|--|--|--|--|--|--|--|--|--|--|
|                                                                                                                                                                  |  |  |  |  |  |  |  |  |  |  |

| Country              | Capital               | Produced in Russia         |            |           |          |           | Produced in Ukraine        |           |           |           |           |
|----------------------|-----------------------|----------------------------|------------|-----------|----------|-----------|----------------------------|-----------|-----------|-----------|-----------|
|                      |                       | Trans fat per 100 gram fat |            |           |          |           | Trans fat per 100 gram fat |           |           |           |           |
|                      |                       | N                          | %*         | Mean      | SD       | Max       | N                          | %*        | Mean      | SD        | Max       |
| Armenia              | Yerevan               | 50                         | 55         | 18        | 9        | 51        | 33                         | 36        | 26        | 14        | 51        |
| Belarus              | Minsk                 | 20                         | 20         | 15        | 9        | 36        | 5                          | 5         | 23        | 6         | 32        |
| Tadjikistan          | Dushanbee             | 121                        | 89         | 11        | 7        | 33        | 10                         | 7         | 15        | 8         | 33        |
| Kirgistan            | Bishkek               | 58                         | 72         | 15        | 8        | 30        | 15                         | 19        | 29        | 13        | 50        |
| Azerbaijan           | Baku                  | 58                         | 68         | 12        | 7        | 35        | 15                         | 18        | 13        | 1         | 33        |
| Moldova              | Chisinau              | 10                         | 19         | 25        | 8        | 35        | 25                         | 47        | 26        | 8         | 42        |
| Ukraine              | Kiev-1                | 0                          | 0          |           |          |           | 81                         | 98        | 14        | 10        | 42        |
| <i>Ukraine **</i>    | <i>Kiev-2</i>         | <i>0</i>                   | <i>0</i>   |           |          |           | <i>62</i>                  | <i>97</i> | <i>14</i> | <i>11</i> | <i>45</i> |
| Uzbekistan           | Taskent               | 50                         | 65         | 10        | 8        | 35        | 20                         | 26        | 16        | 10        | 33        |
| <i>Uzbekistan **</i> | <i>Samarkand</i>      | <i>30</i>                  | <i>48</i>  | <i>14</i> | <i>8</i> | <i>29</i> | <i>28</i>                  | <i>44</i> | <i>19</i> | <i>12</i> | <i>43</i> |
| Turkmenistan         | Ashgabat              | 18                         | 33         | 13        | 8        | 29        | 24                         | 44        | 18        | 11        | 38        |
| Georgia              | Tblisi                | 23                         | 49         | 16        | 10       | 36        | 8                          | 17        | 21        | 9         | 35        |
| Russia               | Moscow                | 75                         | 100        | 10        | 6        | 27        | 0                          | 0         |           |           |           |
| <i>Russia **</i>     | <i>Sct Petersburg</i> | <i>105</i>                 | <i>100</i> | <i>9</i>  | <i>5</i> | <i>27</i> | <i>0</i>                   | <i>0</i>  |           |           |           |
| Kazakhstan           | Astana                | 28                         | 56         | 11        | 8        | 29        | 12                         | 24        | 11        | 6         | 19        |
| Lithuania            | Vilnius               | 0                          | 0          |           |          |           | 9                          | 28        | 11        | 8         | 33        |

|                                                                                                                                                              |         |     |    |    |   |    |     |    |    |    |    |
|--------------------------------------------------------------------------------------------------------------------------------------------------------------|---------|-----|----|----|---|----|-----|----|----|----|----|
| Latvia                                                                                                                                                       | Riga    | 5   | 21 | 9  | 4 | 12 | 4   | 17 | 9  | 4  | 15 |
| Estonia                                                                                                                                                      | Tallinn | 1   | 13 | 29 |   | 29 | 2   | 25 | 19 | 17 | 31 |
|                                                                                                                                                              |         |     |    |    |   |    |     |    |    |    |    |
| 15 countries together                                                                                                                                        |         | 517 | 52 |    |   |    | 263 | 26 |    |    |    |
|                                                                                                                                                              |         |     |    |    |   |    |     |    |    |    |    |
| <p>%* is the number of samples with more than 2% of the fat as TF as percent of all samples obtained in that country with more than 2% of the fat as TF.</p> |         |     |    |    |   |    |     |    |    |    |    |
| <p>** the lines in italic present values for biscuits/cakes/wafers obtained by the same procedure but in extra regions of the same country.</p>              |         |     |    |    |   |    |     |    |    |    |    |
| <p>The values for the three regions are not included in the values in the bottom line.</p>                                                                   |         |     |    |    |   |    |     |    |    |    |    |
|                                                                                                                                                              |         |     |    |    |   |    |     |    |    |    |    |

**Table 2** Shelf life of pre-packaged biscuits/cakes/wafers produced in Russia and Ukraine

|                              | Produced in Russia |         | Produced in Ukraine |         |
|------------------------------|--------------------|---------|---------------------|---------|
|                              | < 2%               | ≥ 2%    | <2%                 | ≥ 2%    |
| <b>Trans fat as % of fat</b> |                    |         |                     |         |
| <b>Number of samples*</b>    | 140                | 453     | 24                  | 220     |
| <b>Shelf life in days</b>    |                    |         |                     |         |
| Mean (SD)                    | 202(83)            | 219(70) | 286(94)             | 215(85) |
| Range                        | 59-547             | 46-396  | 123-366             | 46-546  |

\* Samples obtained in Samarkand, Sct Petersburg, and Kiev-2 were included if these samples had their own *trans* fat analysis and a readable shelf life on the package

Figure 1

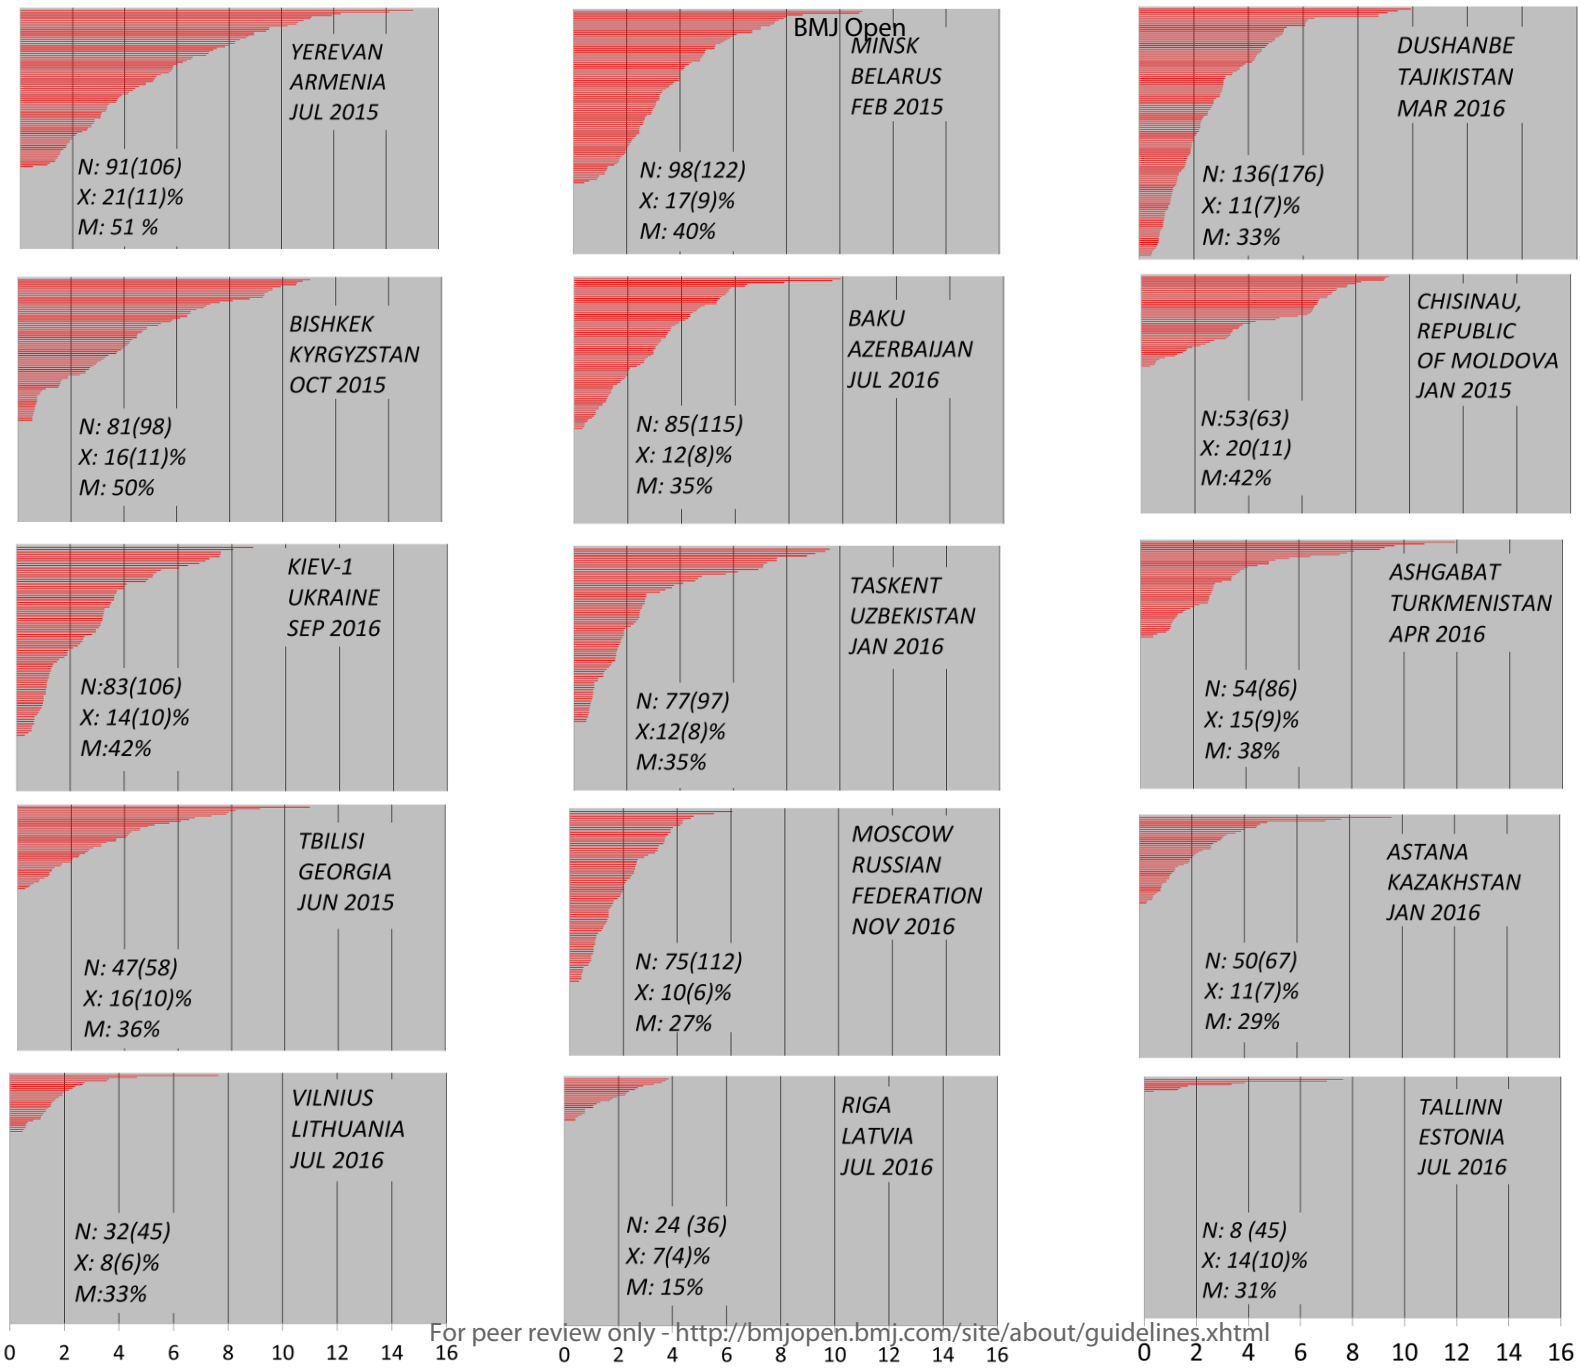

Gram trans fat per 100 gram of product

1  
2  
3  
4  
5  
6  
7  
8  
9  
10  
11  
12  
13  
14  
15  
16  
17  
18  
19  
20  
21  
22  
23  
24  
25  
26  
27  
28  
29  
30  
31  
32  
33  
34  
35  
36  
37  
38  
39  
40  
41

Figure 2

1  
2  
3  
4  
5  
6  
7  
8  
9  
10  
11  
12  
13  
14  
15  
16  
17  
18  
19  
20  
21  
22  
23  
24  
25  
26  
27  
28  
29  
30  
31  
32  
33  
34  
35  
36  
37  
38  
39  
40  
41

BMJ Open

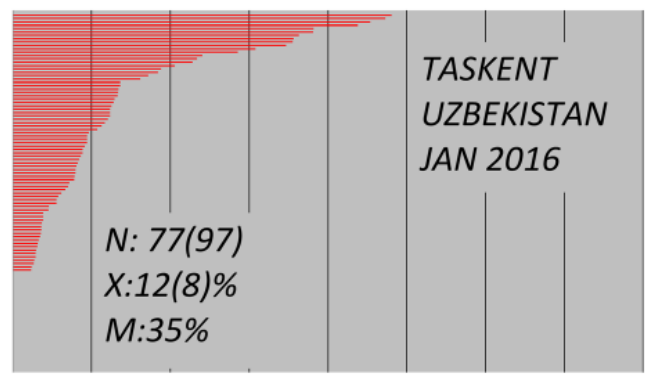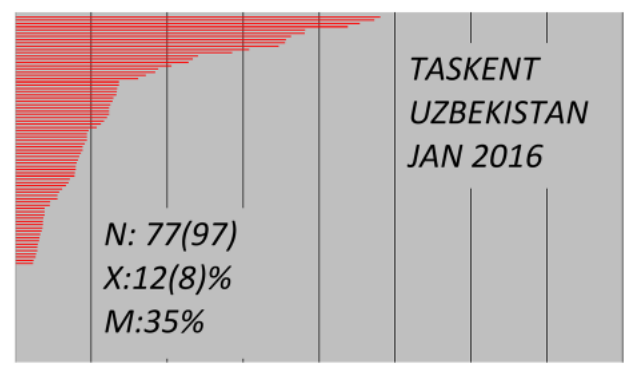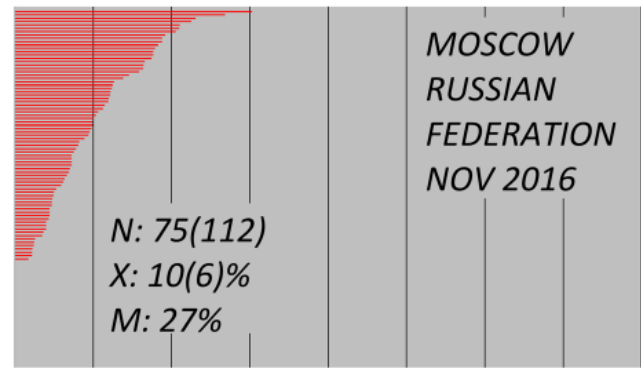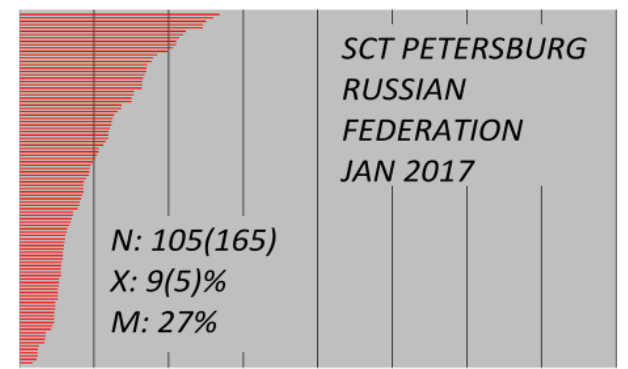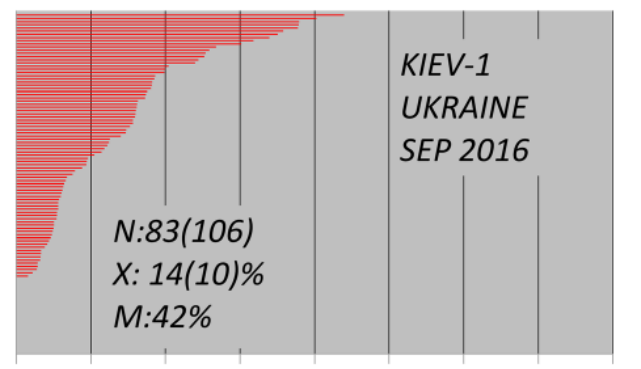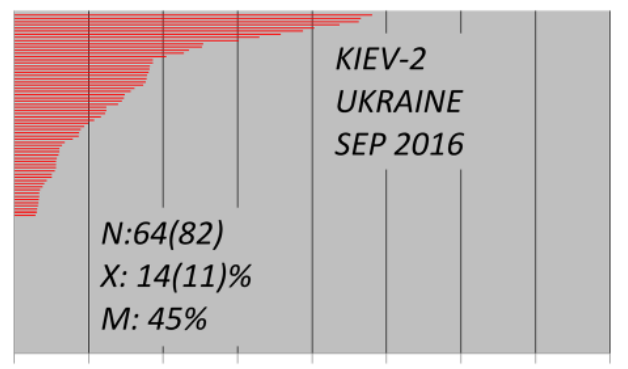

Figure 3

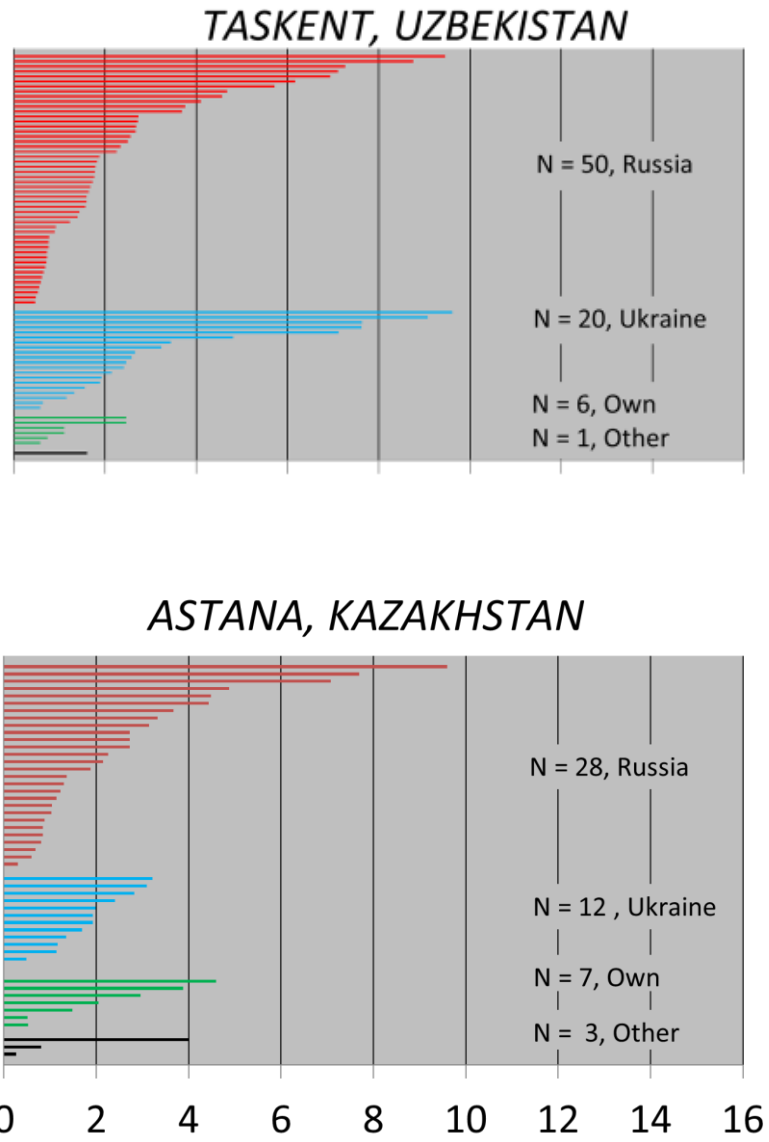

Gram *trans* fat per 100 gram product

Figure 4

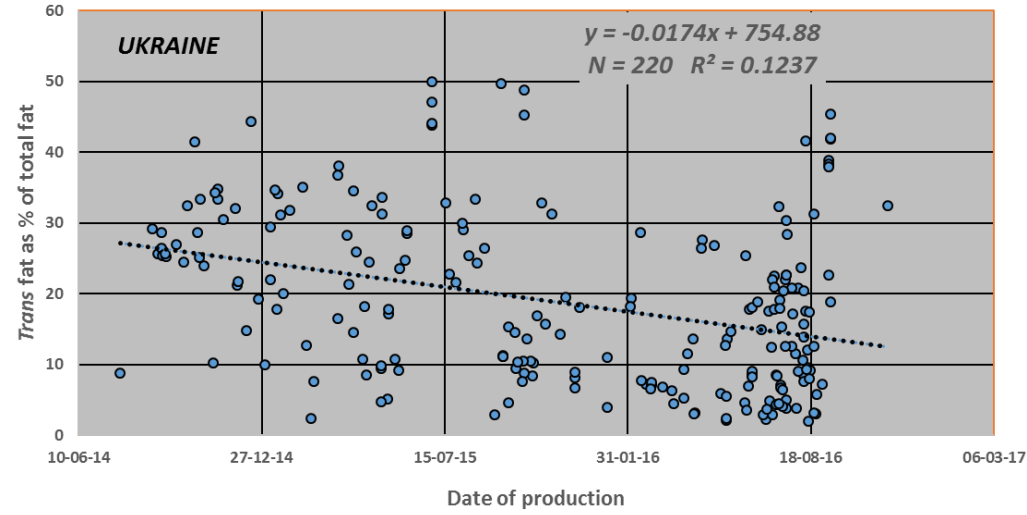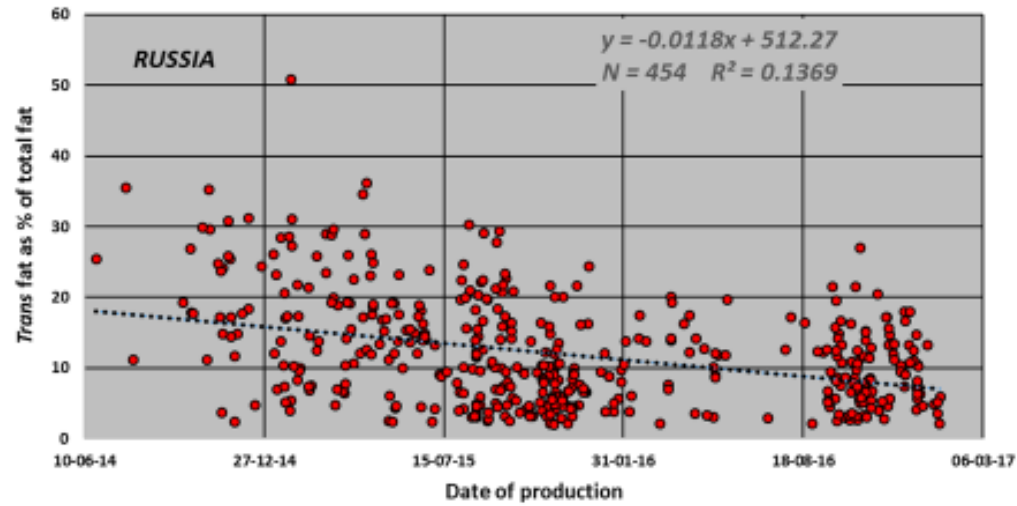

# BMJ Open

## Industrially produced trans fat in popular foods in 2015-2016 in 15 countries of the former Soviet Union: a market basket investigation

|                                 |                                                                                                                                                 |
|---------------------------------|-------------------------------------------------------------------------------------------------------------------------------------------------|
| Journal:                        | <i>BMJ Open</i>                                                                                                                                 |
| Manuscript ID                   | bmjopen-2018-023184.R1                                                                                                                          |
| Article Type:                   | Research                                                                                                                                        |
| Date Submitted by the Author:   | 20-Sep-2018                                                                                                                                     |
| Complete List of Authors:       | Stender, Steen; Kobenhavns Universitet Det Natur- og Biovidenskabelige Fakultet, Nutrion excersize and sports                                   |
| <b>Primary Subject Heading</b>: | Health policy                                                                                                                                   |
| Secondary Subject Heading:      | Health policy, Global health, Public health                                                                                                     |
| Keywords:                       | Coronary heart disease < CARDIOLOGY, NUTRITION & DIETETICS, Health policy < HEALTH SERVICES ADMINISTRATION & MANAGEMENT, central asia trans fat |
|                                 |                                                                                                                                                 |

SCHOLARONE™  
Manuscripts



1

12-09-2018

**Industrially produced *trans* fat in popular foods in 2015-2016 in 15 countries of the former Soviet Union: a market basket investigation**

**Steen Stender, Professor, MD, DMSci**

**Steen Stender, Department of Nutrition, Exercise and Sports, University of Copenhagen, Rolighedsvej 26, Frederiksberg, 1958 DK, Denmark**

**Correspondence to: S Stender [stender@nexs.ku.dk](mailto:stender@nexs.ku.dk)**

**Telephone number: +45 35333162**

**Telephone number: +45 40258601**

**Key Words:** Coronary heart disease, Health policy, Nutrition, Soviet Union, *Trans* fat

## ABSTRACT

**Objective:** To minimize the intake of industrially produced *trans* fat (I-TF) and thereby decrease the risk of coronary heart disease (CHD), several countries have implemented a legislative restriction on I-TF in foods. The objective of this study was to investigate the presence of I-TF in biscuits/cakes/wafers in 15 countries of the former Soviet Union, all with a high coronary mortality compared with countries in Western Europe.

**Design:** Three large supermarkets were visited in the 15 capitals in 2015 or 2016. Pre-packaged biscuits/cakes/wafers were bought if the list of ingredients disclosed that the product contained more than 15 grams fat per 100 grams of product and if partially hydrogenated fat or a similar term, including margarine, refined fat or confectionary fat, were mentioned. Samples of the foods were subsequently analysed for total fat and TF.

**Results:** Some 994 products had more than 2% of total fat as I-TF (illegal in Denmark). In Armenia, 91 different products had a mean value (SD) of 21(11) % of the fat as I-TF. In Estonia, there were 8 products with 14(10) % of the fat as I-TF. The other 13 countries had values in between. In several countries a major part of the products were imported from Russia and Ukraine. Many of these products had a readable production date and a best before date. The mean shelf life (SD) of 673 packages was 218 (75) days. The % TF in the fat of products produced in Russia and in Ukraine in relation to the date of production both declined with approximately 10 % points during the 2 years collection period.

**Conclusions:** The findings suggest that I-TF is used in popular foods in all 15 countries of the former Soviet Union. It opens a possibility for some reduction of the high coronary mortality in these countries.

## Strengths and limitation of this study

- A strength of this study is that the presence of industrially produced *trans* fat in popular foods for the first time is systematically investigated in each of the 15 countries of the former Soviet Union that all have a high coronary mortality and a population of nearly 300 million.
- A limitation of the study is that only pre-packaged biscuits/cakes/wafers were investigated for *trans* fat and no other food groups such as shortenings and margarines and no un-packaged foods such as baked goods, sweet rolls, pastries, buns and even un-packaged biscuits/cakes/wafers were investigated.
- A limitation is the assumption that if the inclusion words are not present in the list of ingredients, the product contains less than 2% of the total fat as *trans* fat.
- Another limitation is that the average daily intake of *trans* fat was not measured in any subgroups of the populations, but instead was inferred from the availability of popular foods with high amounts of *trans* fat in large supermarkets.

## INTRODUCTION

High amounts of *trans* fat (TF) in food i.e. more than 5 % TF of total fat in the food originate from the industrial hydrogenation of edible oils. Compared to non-hydrogenated oils, fats containing industrially produced *trans* fat (I-TF) are solid at room temperature, have some technical advantages for food processing, and prolong the shelf life of products. TF are not synthesized in the human body and are not required in the diet, but is absorbed and metabolized. I-TF can be found at varying amounts in biscuits, pastries, margarine, spreads, confectionary creams and fillings and fried foods such as potato crisps. Fat from ruminants, for instance in dairy products, contains up to 5 % TF (R-TF), which is considerably lower than the up to 50% TF that may be present in partially hydrogenated fat for human food. In a double blind, randomised controlled trial in humans R-TF resulted in the same increase in LDL-cholesterol in blood compared with I-TF when the two different types of fat were given in the diet in same amounts.<sup>1</sup> It suggests that R-TF and I-TF have similar harmful effect on plasma lipoproteins.

Observational studies suggest an association between dietary intake of I-TF and increased risk of coronary heart disease (CHD).<sup>2</sup> The association is further corroborated by an association between plasma TF level and CHD.<sup>3</sup>

1  
2  
3  
4 Plausible mechanisms for the association involving an increase in plasma LDL-cholesterol<sup>4</sup> and unfavourable  
5 “beyond lipid effects” on inflammatory cells important for atherogenesis<sup>5</sup> suggest a causal relationship, even in  
6 the absence of randomized studies with hard clinical endpoints.<sup>6</sup> Based on the available evidence, Denmark in  
7 2004 and some counties in New York State, USA in 2007, legally restricted the use of I-TF in the diet. After the  
8 restrictions in Denmark there was a 4.3% lower yearly mortality rate due to CHD beyond temporal trends.<sup>7</sup> A  
9 similar decline of 4.5 % in CHD mortality rate was found in the counties with restriction in New York State  
10 compared with similar counties without restrictions.<sup>8</sup> Three and more years after the restriction in the counties, a  
11 hospital admission rate for myocardial infarction and stroke events combined was 6.2 % lower than in similar  
12 counties without restrictions.<sup>9</sup> These findings from 2 different groups of researchers, strongly suggest that I-TF in  
13 the diet promotes CHD and a restriction in its use reduces CHD. What remains to be explored is to what extent I-  
14 TF still is used in popular foods in countries with high rates of CHD-mortalities.  
15  
16  
17  
18  
19  
20  
21  
22  
23  
24

25 The 15 countries of the former Soviet Union all have an extraordinarily high rate of CHD mortality compared  
26 with countries in Western Europe.<sup>10</sup> (supplementary table A) In a systematic analysis, including 266 country-  
27 specific nutrition surveys, the average consumption of TF in 2010 in Central Asia and Eastern Europe that  
28 together include the 15 countries of the former Soviet Union, for adults of more than 20 years, were 0.9% of total  
29 energy intake.<sup>11</sup> This intake corresponds to approximately 2.5 gram TF per day per adult and is less than the 1% of  
30 total energy percent recommended by WHO. The consumption level was found stable since 1990. Among the  
31 world’s 21 different regions Central Asia and Eastern Europe were placed as number 5 and 8, respectively with  
32 the lowest average consumption of TF, suggesting that intake of TF is a minor health problem in these countries.  
33 However, the investigators mention the relatively limited data availability on TF consumption in most of these  
34 nations compared with other major dietary factors.<sup>11</sup> Furthermore a low average intake of TF in a nation does not  
35 exclude a high intake of TF in subgroups of the population if popular foods contain high amounts of I-TF.  
36  
37  
38  
39  
40  
41  
42  
43  
44  
45

46 Some recent Russian studies, with an abstract in English, mention the harmful effect on health of dietary I-TF  
47 and pledge for a removal of I-TF from margarine “to preserve the health of Russia’s population”.<sup>12,13</sup> A study  
48 from Estonia reports about high I-TF in blended spreads, margarines and shortenings bought in the Estonian retail  
49 market in 2011.<sup>14</sup> Additionally, technical reports from the WHO find several types of street foods with high  
50 amounts of TF in Dushanbe, Tajikistan, April/May 2016, and in Bishkek, Kyrgyzstan, June/July 2016.<sup>15</sup> In a  
51  
52  
53  
54  
55  
56  
57  
58  
59  
60

1  
2  
3  
4 recent systematic review of TF intake and its dietary sources in general populations worldwide based on data from  
5  
6 29 different countries and a demonstration of a substantial reduction in I-TF in many countries, none of the  
7  
8 countries of the former Soviet Union were included, either for the intake of the general population or for the  
9  
10 study's secondary research question about the composition of fat in biscuits, because of the lack of data.<sup>16</sup>  
11  
12 Apparently, there is a pronounced scarcity of newer internationally published data about I-TF in foods in most of  
13  
14 these countries. The purpose of the present study was to investigate the presence of I-TF in popular foods in the  
15  
16 15 countries of the former Soviet Union by a newly developed market basket method.<sup>17</sup>  
17  
18  
19

## 20 METHODS

### 21 **Purchase of biscuits/cakes/wafers in supermarkets**

22  
23  
24  
25  
26 By using Wikipedia and local tourist information offices, three large supermarkets were identified in each capital,  
27  
28 preferably chain supermarkets with many large shops across the country.<sup>18</sup> Pre-packaged biscuits/cakes/wafers  
29  
30 were chosen as the food to be investigated for TF in this study because these types of foods are frequently  
31  
32 consumed, easily accessible, and transportable at ambient temperature. Furthermore, these foods traditionally  
33  
34 contain I-TF-rich, partially hydrogenated vegetable oils as their major lipid ingredient, and I-TF has previously  
35  
36 been found in these foods in high concentrations in some countries in Eastern Europe.<sup>19–21</sup> The packages of  
37  
38 biscuits/cakes/wafers were obtained in each supermarket by systematically examining the labels of the products.  
39  
40 Packages were purchased if they met the following criteria on the list of ingredients:

- 41  
42 • Total fat content was equal to or exceeded 15 g per 100 g of product.
- 43  
44 • Listed one or more of the terms: partially hydrogenated fat, hydrogenated fat, hardened fat, refined fat,  
45  
46 confectionary fat, deodorized fat, all-purpose fat or margarine.
- 47  
48 • If the list of ingredients indicated *trans* fat > 0 g, these foods were also included.
- 49  
50 • Packages with the term 'unhydrogenated fat' or 'fully hydrogenated fat' or 'no *trans* fat' were not  
51  
52 purchased.  
53  
54

1  
2  
3  
4 If the same package with the same barcode number was found in more than one of the three different  
5 supermarkets in the same capital, only the package with the most recent production date was included in the study.  
6  
7 Each package was subsequently labelled with an ID-number, and duplicate samples each of approximately 50  
8 grams of the product were taken for analysis. The barcode number, the name of the producer, the country of origin  
9 and, if available, the best before date as well as the production date were registered, and the empty packages were  
10 stored. The first 2 digits (sometimes three digits) in the barcode number identify the country or economic region  
11 numbering authority which assigned the manufacturer code. The Russian Federation uses the code 46, Ukraine the  
12 code 482. The manufacturer code is the next 5 digits followed by the product code, consisting of 5 digits. The last  
13 digit is the check digit.<sup>22</sup>  
14  
15  
16  
17  
18  
19  
20

21 To investigate to what extent the presence of biscuits/cakes/wafers in the capital differed from other parts of the  
22 country, biscuits/cakes/wafers were obtained in 3 different supermarkets in each of 2 different regions of the 2  
23 large countries Uzbekistan and Russia: in Uzbekistan also in the second largest city Samarkand (0.4 million  
24 inhabitants and approximately 300 km from Taskent) and in Russia also in Sct. Petersburg (5.2 million inhabitants  
25 and approximately 800 km from Moscow). The third large country was Ukraine. In its capital Kiev, 3 other large  
26 supermarkets were visited (Kiev-2) in addition to the first 3 that were visited (Kiev-1).  
27  
28  
29  
30  
31  
32  
33  
34  
35

### 36 **Analysis of TF**

37  
38  
39 The samples from the various countries were analysed successively and in the order they were obtained. Samples  
40 obtained in the first countries that were visited (Moldova, Belarus, Georgia, Armenia and Kyrgyzstan) were all  
41 analysed for TF. In the other countries that were visited later some packages were obtained with the same barcode  
42 number, and the same visual appearance and list of ingredients as on packages where the samples already were  
43 analysed. A sample from the newly found package was analysed only if the best before date on that package  
44 exceeded the best before date by more than 12 months on a package that already had been analysed. Otherwise,  
45 the TF values were carried forward to the new package.(supplementary table B)  
46  
47  
48  
49  
50  
51  
52

53 For analysis the foods were homogenized, and the fatty acid content was analysed using gas  
54 chromatography on a 66-m highly polar capillary column, using a modification of the AOAC 996-06  
55  
56  
57  
58  
59  
60

1  
2  
3  
4 method. The method makes it possible to get total fat as triglycerides, which are then broken down into  
5 mono-, poly-, saturated- and total TF. Total TF may consist of up to 8 different *trans* fatty acids. All  
6 analytical work on samples was conducted by Microbac Laboratories in Warrendale, Pennsylvania, USA,  
7  
8 The laboratory undergo annual proficiency testing and are audited every other year to ensure compliance of  
9  
10 this method to ISO 17025.  
11  
12

13  
14 From the peaks in the chromatogram TF is calculated as a fraction (percent) of total fat in the product. This  
15 value is primarily of interest for food producers, food chemists and food legislators. The total amount of fat  
16 in 100 grams of the product is determined from the chromatogram. When that value is multiplied by the TF-  
17 fraction the amounts of TF in gram per 100 grams of the product appear. This value is primarily of interest  
18 for the customers and for investigators of the health effect of intake of TF.  
19  
20  
21  
22  
23  
24

25 The measurement does not distinguish I-TF from R-TF. If butter as a ruminant fat has been used in the product in  
26 addition to partially hydrogenated vegetable oil, some of the TF in the product may be derived from butter that on  
27 average contains a few percent and maximum 5 % of the fat as R-TF. In this paper, the term I-TF is used even  
28 though a minor portion in certain products may be TF derived from ruminant fat. If butter is present in a product  
29 which have been analysed for TF in the present study and the value is higher than 5% TF of total fat, butter has  
30 diluted the I-TF in the product, because butter adds more non-TF than it adds TF. Values larger than 5% TF in the  
31 product are consequently minimum values for I-TF as percent of total fat. In products with less than 5% TF as  
32 percent of total fat that contain butter, the I-TF will be lower than the TF value. Such products are because of their  
33 low amounts of TF per 100 gram of product of less importance for the health of the consumer than products with  
34 much higher TF values and of less interest for health authorities and food scientists.  
35  
36  
37  
38  
39  
40  
41  
42  
43

#### 44 **Patient and Public involvement**

45  
46 Patients and public were not involved in the present study.  
47  
48  
49  
50  
51  
52  
53  
54  
55  
56  
57  
58  
59  
60

## Statistical analysis

For each country, simple linear regression models were used to describe the change in % TF of total fat as a function of shelf life and over time recorded as date of production. The statistical software R was used (R Core Team, 2017).

## RESULTS

The number of different packages obtained in 3 different supermarkets in each of the 15 capitals totalled 1332. Samples from 1068 packages were analysed, and TF values for each of the remaining 264 packages were taken from a similar package with an identical barcode but obtained earlier in another country and already analysed. Some 994 samples had more than 2% of the fat as TF. The different products in each country were ranked according to I-TF level, expressed as grams per 100 g of the product (figure 1). This latter value tells how much TF the consumer gets when 100 grams of the product is consumed. Each horizontal bar in each panel represents a product with more than 2% of the fat as TF. The number of these products is shown together with the number of packages, given in parenthesis that fulfilled the inclusion criteria. The products depicted in each panel are all different, but the same product may appear in the panels for two or more countries. The mean values of the percentages of fat that were I-TF in the collection of different products from each of the countries, together with the SD and maximum values are shown. These percentages are of interest for food producers and for food authorities because they describe the fat that has been used in the food. In some products obtained in Armenia and in Kyrgyzstan about 50 % of the fat was I-TF. (figure 1)

In the second largest city, Samarkand, in Uzbekistan, 29% of the packages were similar based on the barcode number to the packages found in the capital, Taskent. In Sct Petersburg, Russia, 30% were similar to the products found in Moscow, and in Kiev-2, the second region of collection, 48% were similar to the packages found in the first region of collection, Kiev-1. Even though most products were different in the 2 different regions of the same country, the panels that reflect the availability of biscuits/cakes/wafers with more than 2 % TF in the fat are rather



1  
2  
3  
4 similar (figure 2). This suggests that the panels presented for each country in figure 1 represent a pattern found  
5 elsewhere in the country and not only in the capital.  
6  
7

8 For the 994 products with more than 2% of the fat as I-TF and obtained in the 15 capitals of the former Soviet  
9 Union, 52% were produced in Russia, 26% in Ukraine, 13% in own country, and 8 % in some other countries for  
10 instance Poland and Bulgaria (table 1). For the products produced in Russia, 85% were obtained outside Russia, in  
11 the other countries of the former Soviet Union combined, not including Ukraine and Lithuania. For the products  
12 produced in Ukraine, 69% were obtained outside Ukraine in the other countries, excluding Russia. The import  
13 patterns of pre-packaged biscuits/cakes/wafers differed from country to country exemplified by the patterns  
14 observed for Uzbekistan and Kazakhstan. (figure 3) The concentrations in grams of TF per 100 grams of product  
15 are in a panel for each of the two countries, depicted with each product placed together with other products from  
16 the same country of origin. The numbers and the mean values of the concentrations of TF in the fat of pre-  
17 packaged biscuits/cakes/wafers produced in Russia and in Ukraine but obtained in the various countries of the  
18 former Soviet Union are shown in table 1. All of the 75 different products with more than 2% of the fat as TF  
19 obtained in Moscow were produced in Russia, and 81 of the 83 different products obtained in Kiev-1 were  
20 produced in Ukraine. The same pattern was seen in Sct Petersburg, Russia and in Kiev-2, Ukraine, respectively. In  
21 each of the countries, except for the 3 Baltic countries and Belarus, a majority of the products were imported from  
22 Russia and Ukraine.  
23  
24  
25  
26  
27  
28  
29  
30  
31  
32  
33  
34  
35  
36

37 The analysis of shelf life was only conducted for packages produced in Russia and Ukraine, as they were the  
38 main exporters to most of the other countries, and in many of the products, especially from Russia, the length of  
39 the shelf life appeared on the package. This is in contrast to pre-packaged biscuits/cakes/wafers produced in most  
40 countries in the more western part of Europe. These packages only have the best before date and the shelf life of  
41 the product is usually hidden for the final customer. Products with less than 2% TF in the fat had shelf lives of  
42 approximately 200 days, comparable to products with a much higher concentration of TF (table 2). The most  
43 frequent length of shelf life was 6 months, whether the products were produced in Russia or in Ukraine. The slope  
44 of the regression line between shelf life and % TF of total fat was significantly negative for Ukraine ( $p < 0.0001$ )  
45 and significantly positive for Russia ( $p < 0.0001$ ). Taken together, the data did not support the conclusion that the  
46 higher the TF in the product, the longer the shelf life.  
47  
48  
49  
50  
51  
52  
53  
54  
55  
56  
57  
58  
59  
60

1  
2  
3  
4 Since the samples of biscuits/cakes/wafers were collected between January 2015 and January 2017, and many  
5 were produced in Russia and in Ukraine, the % TF of total fat in the product was depicted in relation to the date of  
6 production. The TF concentrations decrease significantly during the 2 years in Russia ( $p < 0.0001$ ) as well as in  
7 Ukraine ( $p < 0.0001$ ), but the decrease did not differ significantly between the two countries ( $p = 0.12$ ) (figure 4).  
8  
9 The products from Ukraine had a higher TF % in the start of the period than the products from Russia. Based on  
10 the slopes of the regression lines in figure 4, the decline for products from Ukraine was 12.4 % points and for  
11 products from Russia 8.4 % points during the 2 years period.  
12  
13  
14  
15  
16  
17  
18  
19

## 20 **DISCUSSION**

### 21 **The principal findings**

22  
23 The findings of this study clearly demonstrate that in 2015-2016 I-TF was present in high concentrations i.e. more  
24 than 5 % I-TF in the total fat in many different brands of biscuits/cakes/wafers in the countries of the former  
25 Soviet Union, except for the 3 Baltic countries. This information was not previously available and may be of  
26 relevance because of the high coronary mortality in these countries. In 3 of the countries- Russia, Ukraine and  
27 Belarus, by far most of the products are produced in the country itself. For the other countries, except for the 3  
28 Baltic countries, imports from food producers in Russia and Ukraine make up a major part of their products with  
29 high amounts of TF.  
30  
31  
32  
33  
34  
35  
36  
37  
38

39 In all of the shops there were more different packages containing biscuits/cakes/wafers that did not have the  
40 inclusion terms on the label than packages that had one or more of the terms on the label. This suggests that there  
41 are plenty of biscuits/cakes/wafers without I-TF available in all of the 45 supermarkets. Of the 1332 packages that  
42 fulfilled the inclusion criteria and were bought, 335 (25%) of the products had less than 2% of the fat as TF. This  
43 suggests that the inclusion criteria are rather broad in relation to the presence of TF and/or that the terms on the  
44 list of ingredients do not always reflect the composition of the fat in the product. If the list of ingredients does not  
45 have the inclusion words the product may still have high amounts of TF and are not bought and analysed for TF.  
46  
47  
48  
49  
50  
51  
52

53 The amounts of TF per 100 grams of product bought in Moscow did not exceed 6 grams (figure 1), whereas  
54 several products produced in Russia, but obtained in the other countries had more than 6 grams per 100 grams, for  
55  
56  
57  
58  
59  
60

1  
2  
3  
4 instance in Uzbekistan and Kazakhstan (figure 3). The same is seen for the average concentration of I-TF in  
5  
6 products obtained in Russia, with mean value and SD of 10(6) %, compared with considerable higher values in  
7  
8 Russian products obtained in the other countries (table 1). The same pattern is seen for products bought in  
9  
10 Ukraine, compared with products produced in Ukraine but obtained in some of the other countries (table 1). The  
11  
12 products obtained in Russia were bought more than a year later than the products produced in Russia but obtained  
13  
14 in the other countries. This was also the case for the products obtained in Ukraine and outside Ukraine. Some of  
15  
16 the difference may be due to a decrease in the use of I-TF during the time period.(figure 4)

17  
18 I-TF has been used in foods such as biscuits/cakes/wafers also because it apparently prolongs the shelf life of the  
19  
20 foods. This is presently not supported by the findings that 186 products produced in Russia with a shelf life of 6  
21  
22 months had TF concentrations of 11 (7)% mean value (SD) and 37 products with a shelf life of 12 months, also  
23  
24 had TF concentrations of 11 (7)%. The corresponding values from products produced in Ukraine were for 86  
25  
26 products with shelf life of 6 months 20 (9) % and for 30 products with shelf life of 12 months 10 (6) %.

27  
28 Based on the plasma concentrations of TF in nationally representative groups in 2010 in the USA (3 years after  
29  
30 the introduction of mandatory labelling of TF on pre-packaged foods and in spite of a nearly 50 % lower average  
31  
32 TF-concentration in plasma), there is still a subgroup with very high TF concentrations, reflecting a subgroup in  
33  
34 the general population with a high consumption of TF.<sup>4</sup> A vicious cycle apparently occurs: as long as foods with  
35  
36 high amounts of I-TF are present in the shops, some consumers will buy them, and as long as they are bought, the  
37  
38 foods will be available. This may also be the case in the countries of the former Soviet Union. Despite a decline in  
39  
40 the average intake of I-TF in many countries in Western Europe,<sup>16</sup> in 2015 the WHO estimated that millions of  
41  
42 Europeans still consume TF at levels that significantly increase their risk for CHD.<sup>23</sup> The findings reported in the  
43  
44 present investigation confirm this estimate.

#### 45 46 47 48 **Strength and weaknesses of the study**

49  
50  
51 Strengths of this study include that the same procedure was used to obtain popular foods in large supermarkets in  
52  
53 all 15 countries of the former Soviet Union, and in the 3 largest countries in two different regions and that the  
54  
55 samples were analysed for TF in the same laboratory. A limitation of this study is that no other food groups (such  
56  
57  
58  
59  
60

1  
2  
3  
4 as shortenings and margarines) and no un-packaged foods (such as baked goods, sweet rolls, pastries, buns and  
5 even un-packaged biscuits/cakes/wafers) were investigated. It is also assumed that if the inclusion words are not  
6 present in the list of ingredients, the product contains less than 2% of the total fat as TF. The presence of high  
7 concentrations of I-TF in biscuits/cakes/wafers may be a sign that I-TF is used in other foods as well. Another  
8 limitation is that the average daily intake of I-TF was not measured in any subgroups of the populations, but  
9 instead was inferred from the availability of popular foods with high amounts of I-TF in large supermarkets. The  
10 competition for shelf space in supermarkets is usually fierce. If products do not sell, they are rapidly replaced by  
11 other products. A relevant subgroup for intake studies would be the consumers who buy pre-packaged  
12 biscuits/cakes/wafers.  
13  
14  
15  
16  
17  
18  
19  
20  
21  
22  
23

#### 24 **Legislation and industrially produced *trans* fat in foods**

25  
26  
27 In the USA in 2015, the FDA revoked the previous GRAS (Generally Recognized As Safe) status of partially  
28 hydrogenated oils - a step that may remove I-TF from food production in the USA before July 2018, and Canada  
29 is following suit.<sup>24</sup> In 2009, Austria and Switzerland introduced a legislative ban similar to the Danish ban from  
30 2004, followed by Iceland in 2011, Hungary and Norway in 2014, and initiated by Latvia, Georgia, Lithuania,  
31 Slovenia and other Eastern European countries including Russia between 2016 and 2018.<sup>13,25,26,27</sup> The samples  
32 for the present study were all collected in the various capitals in 2015 or 2016 (supplementary table A) before any  
33 of the legislative restrictions of I-TF in food were fully implemented in these countries. However, some of their  
34 food producers were most likely aware of future legislation. They may have commenced a gradual removal of I-  
35 TF from some of their products already in 2015 and 2016. This may be the explanation for the relatively few  
36 products with TF in Lithuania and in Latvia. The explanation is apparently not valid for Estonia that only had 8  
37 products with more than 2 % of the fat as TF and has no internationally published plan for a legislation like the  
38 two other Baltic countries. (figure 1 and table 1)  
39  
40  
41  
42  
43  
44  
45  
46  
47  
48  
49

50 The European Union published a report in 2015, originally commissioned in 2011, that “indicates the need to  
51 continue and expedite work in this area by collecting more information”.<sup>28,29</sup> In the WHO-Europe investigation of  
52 the various ways to reduce I-TF in foods, it was concluded that establishing a legal limit for the content of I-TF in  
53  
54  
55  
56  
57  
58  
59  
60

1  
2  
3  
4 foods is potentially the only available option that reduces the risks associated with I-TF faced by all consumers  
5 and doing so may contribute to reducing inequalities. Such a policy is unique in its combination of efficacy, cost-  
6 effectiveness and low potential for negative impact. Removing I-TF from the food supply is possibly one of the  
7 most straightforward public health interventions for reducing risk of CHD.<sup>23</sup> The trend over time of using fat  
8 with lower amounts of I-TF (figure 4) will probably accelerate in 2018 among food factories in Russia due to the  
9 Russian legislation<sup>27</sup> and among factories in Ukraine due to competition with Russian factories. The intake of I-  
10 TF in the two large countries may decrease, but in addition also the intake of I-TF among millions of inhabitants  
11 in the adjacent countries due to the large export of biscuits/cakes/wafers from Russia and Ukraine to these  
12 countries.<sup>18</sup> (table 1)  
13  
14  
15  
16  
17  
18  
19  
20  
21  
22  
23

#### 24 **Future research and implications for policy makers**

25  
26  
27 It is of considerable interest whether coronary mortality and admission rates for CHD and stroke will change in  
28 countries that have recently introduced legislation that restricts the use of I-TF or intend to do so in the near  
29 future, in the same way as it was observed in Denmark and in certain counties in New York State.<sup>7,8,9</sup>  
30  
31  
32

33 On the basis of data from 2009 to 2011, there is a fivefold difference in age-standardized mortality rates of CHD  
34 between some countries in Western Europe and countries in Central and Eastern Europe, with Central Asia having  
35 the highest rates.<sup>10</sup> Central Eastern Europe and Central Asia were the world regions with the highest current age-  
36 standardized cardiovascular mortality rates, which are more than twice those of Latin America and the  
37 Caribbean.<sup>30</sup> These differences cannot be explained only by differences between the countries in the intake of I-  
38 TF. The present study demonstrates a presence of I-TF in popular foods in the countries of the former Soviet  
39 Union with excessively high CHD mortality. Restriction of the use of I-TF in foods, either voluntarily by food  
40 producers or more efficiently by legislation, may be an easily implemented first strategy for some reduction of  
41 cardiovascular diseases in these countries.  
42  
43  
44  
45  
46  
47  
48  
49  
50  
51  
52  
53

#### 54 **REFERENCES**

55  
56  
57  
58  
59  
60

1. Gebauer SK, Destailhats F, Dionisi F, *et al.* Vaccenic acid and trans fatty acid isomers from partially hydrogenated oil both adversely affect LDL cholesterol: a double-blind, randomized controlled trial. *Am J Clin Nutr* 2015;102(6):1339-46.
2. de Souza RJ, Mente A, Maroleanu A, *et al.* Intake of saturated and trans unsaturated fatty acids and risk of all cause mortality, cardiovascular disease, and type 2 diabetes: systematic review and meta-analysis of observational studies. *BMJ* 2015;351: h3978. doi:10.1136/bmj.h3978.
3. Li H, Zhang Q, Song J, *et al.* Plasma trans-fatty acids levels and mortality: a cohort study based on 1999-2000 National Health and Nutrition Examination Survey (NHANES). *Lipids Health Dis* 2017; 16: 176.doi:10.1186/s12944-017-0567-6.
4. Yang Q, Zhang Z, Loustalot F, *et al.* Plasma *trans*-Fatty Acid Concentrations Continue to Be Associated with Serum Lipid and Lipoprotein Concentrations among US Adults after Reductions in *trans*-Fatty Acid Intake. *J Nutr* 2017;147:896–07.
5. Hirata Y, Takahashi M, Kudoh Y, *et al.* Trans-Fatty acids promote proinflammatory signaling and cell death by stimulating the apoptosis signal-regulating kinase 1 (ASK1)-p38 pathway. *J Biol Chem.* 2017; 292: 8174–85 doi: 10.1074/jbc.M116.771519.
6. Brouwer IA, Wanders AJ, Katan MB. *Trans* fatty acids and cardiovascular health: research completed? *Eur J Clin Nutr* 2013;67:541–47.
7. Restrepo BJ, Rieger M. Denmark's Policy on Artificial Trans Fat and Cardiovascular Disease. *Am J Prev Med* 2016;50:69–76.
8. Restrepo BJ, Rieger M. Trans fat and cardiovascular disease mortality: Evidence from bans in restaurants in New York. *J. Health Econ* 2016;45:176–196.
9. Brandt EJ, Myerson R, Perrailon MC, *et al.* Hospital Admissions for Myocardial Infarction and Stroke Before and After the Trans-Fatty Acid Restrictions in New York. *JAMA Cardiol* 2017;2:627–634.

15

10. Nichols M, Townsend N, Scarborough P, *et al*. Cardiovascular disease in Europe 2014: epidemiological update. *Eur Heart J* 2014;35:2950–59.
11. Micha R, Khatibzadeh S, Shi P, *et al*. Global, regional, and national consumption levels of dietary fats and oils in 1990 and 2010: a systematic analysis including 266 country-specific nutrition surveys. *BMJ* 2014; 348:g2272 doi:10.1136/bmj.g2272.
12. Perova NV, Metel'skaia VA, Boytsov SA. [Trans isomers of unsaturated fatty acids increase the risk of atherosclerosis-related circulatory system diseases].[Article in Russian]. *Ter Arkh* 2013;85:113-7.
13. Boytsov SA, Perova NV. To lower trans fatty acid intake as an important condition for the reduction of cardiovascular Mortality (Article). *Profilakticheskaya Meditsina* 2017;20:4-9.
14. Meremäe K, Roasto M, Kuusik S, *et al*. Trans Fatty Acid Contents in Selected Dietary Fats in the Estonian Market. *J Food Sci.* 2012;77:163-8.
15. FEEDcities project. The food environment description in cities in Eastern Europe and Central Asia - Tajikistan and Kyrgyzstan. Technical report, WHO Europe, June 2017 and August 2017  
[http://www.euro.who.int/\\_data/assets/pdf\\_file/0012/353001/FEED-TJK-report.pdf?ua=1](http://www.euro.who.int/_data/assets/pdf_file/0012/353001/FEED-TJK-report.pdf?ua=1)  
[http://www.euro.who.int/\\_data/assets/pdf\\_file/0006/351996/FEED-KGZ-report-web-new.pdf?ua=1](http://www.euro.who.int/_data/assets/pdf_file/0006/351996/FEED-KGZ-report-web-new.pdf?ua=1)  
(Accessed Sep 2018).
16. Wanders AJ, Zock PL, Brouwer IA. Trans Fat Intake and Its Dietary Sources in General Populations Worldwide: A Systematic Review. *Nutrients.* 2017;9:840; doi:10.3390/nu9080840.
17. Stender S, Astrup A, Dyerberg J. A trans European Union difference in the decline in trans fatty acids in popular foods: a market basket investigation. *BMJ Open* 2012;17:2 e000859. doi: 10.1136/bmjopen-2012-000859.
18. [https://en.wikipedia.org/wiki/Post-Soviet\\_states#General\\_statistics](https://en.wikipedia.org/wiki/Post-Soviet_states#General_statistics) (Accessed Sep 2018).
19. Kravic SZ, Suturovic ZI, Svarc-Gajic JV, *et al*. Fatty acid composition including *trans*-isomers of Serbian biscuits. *Hem Ind* 2011;65:139–46.

- 1  
2  
3  
4 20. Stender S, Astrup A, Dyerberg J. Tracing artificial *trans* fat in popular foods in Europe: a market basket  
5 investigation. *BMJ Open* 2014;4: e005218.  
6  
7  
8  
9 21. Stender S, Astrup A, Dyerberg J. Artificial trans fat in popular foods in 2012 and in 2014: a market  
10 basket investigation in six European countries. *BMJ Open* 2016;6: e010673.  
11  
12  
13 22. [https://da.wikipedia.org/wiki/International\\_Article\\_Number\\_\(EAN\)](https://da.wikipedia.org/wiki/International_Article_Number_(EAN)) (Accessed Sep 2018).  
14  
15  
16 23. Eliminating trans fats in Europe – A policy brief ( 2015) [http://www.euro.who.int/en/health-](http://www.euro.who.int/en/health-topics/disease-prevention/nutrition/publications/2015/eliminating-trans-fats-in-europe-a-policy-brief-2015)  
17 [topics/disease-prevention/nutrition/publications/2015/eliminating-trans-fats-in-europe-a-policy-brief-](http://www.euro.who.int/en/health-topics/disease-prevention/nutrition/publications/2015/eliminating-trans-fats-in-europe-a-policy-brief-2015)  
18 [2015](http://www.euro.who.int/en/health-topics/disease-prevention/nutrition/publications/2015/eliminating-trans-fats-in-europe-a-policy-brief-2015) (Accessed Mar 2018).  
19  
20  
21  
22 24. FDA Cuts Trans Fat in Processed Foods  
23 <http://www.fda.gov/ForConsumers/ConsumerUpdates/ucm372915.htm> (Accessed Sep 2018)  
24  
25  
26 25. Vučić V, Arsić A, Petrović S, *et al.* Trans fatty acid content in Serbian margarines: Urgent need for  
27 legislative changes and consumer information. *Food Chem* 2015;185:437–40.  
28  
29  
30  
31 26. Wilczek MM, Olszewski R, Krupienicz A. *Trans*-Fatty Acids and Cardiovascular Disease: Urgent Need  
32 for Legislation. *Cardiology*. 2017;138:254–58.  
33  
34  
35  
36 27. Russia. Solnechnye Produkty ready to meet new trans-fat content standards  
37 [http://www.blackseagrains.net/novosti/russia-solnechnye-produkty-ready-to-meet-new-trans-fat-content-](http://www.blackseagrains.net/novosti/russia-solnechnye-produkty-ready-to-meet-new-trans-fat-content-standards)  
38 [standards](http://www.blackseagrains.net/novosti/russia-solnechnye-produkty-ready-to-meet-new-trans-fat-content-standards) (Accessed Sep 2018)  
39  
40  
41  
42 28. Report from the Commission to the European parliament and the Council regarding trans fats in foods  
43 and in the overall diet of the Union population. (03-12-2015) [http://ec.europa.eu/dgs/health\\_food-](http://ec.europa.eu/dgs/health_food-safety/dyna/enews/enews.cfm?al_id=1650)  
44 [safety/dyna/enews/enews.cfm?al\\_id=1650](http://ec.europa.eu/dgs/health_food-safety/dyna/enews/enews.cfm?al_id=1650) (Accessed Sep 2018).  
45  
46  
47  
48 29. [https://ec.europa.eu/info/consultations/open-public-consultation-initiative-limit-industrial-trans-fats-](https://ec.europa.eu/info/consultations/open-public-consultation-initiative-limit-industrial-trans-fats-intakes-eu_en)  
49 [intakes-eu\\_en](https://ec.europa.eu/info/consultations/open-public-consultation-initiative-limit-industrial-trans-fats-intakes-eu_en) (accessed Sep 2018)  
50  
51  
52  
53 [http://ec.europa.eu/smart-regulation/roadmaps/docs/2016\\_sante\\_143\\_trans\\_fats\\_en.pdf](http://ec.europa.eu/smart-regulation/roadmaps/docs/2016_sante_143_trans_fats_en.pdf) (Accessed Sep  
54 2018).  
55  
56  
57  
58  
59  
60



- 1  
2  
3  
4 30 Barquera S, Pedroza-Tobías A, Medina C, *et al.* Global Overview of the Epidemiology of Atherosclerotic  
5 Cardiovascular Disease. *Arch Med Res* 2015;46:328–38  
6  
7  
8  
9  
10

## 11 LEGENDS

### 12 13 14 **Figure 1**

15  
16 Amounts of industrially produced *trans* fat (I-TF) in 100 grams of pre-packaged biscuits/cakes/wafers purchased  
17 in 2015-2016 in three supermarkets in each of the 15 capitals. Each bar in a panel represents a unique product  
18 bought in that capital, i.e., none of the products in a given panel had the same barcode number. N is the number of  
19 different products with more than 2 % TF of the total fat content. (N) is the number of packages that fulfilled the  
20 inclusion criteria. X is the mean value and the standard deviation of the percentages of I-TF in the total fat of the  
21 N products, M is the maximal value of I-TF as percent of total fat. Each bar in all of the 15 panels has the same  
22 thickness, which means that the area of the bars is comparable between the different panels.  
23  
24  
25  
26  
27  
28  
29

### 30 31 **Figure 2**

32  
33 The legend for this figure is similar to the legend for Figure 1. The 4 upper panels show the result for 2 of the  
34 capitals and for 2 other large cities in the same country. The lowest 2 panels give the results from the purchase in  
35 3 large supermarkets in Kiev (Kiev-1) and in 3 other large supermarkets in the same city (Kiev-2).  
36  
37  
38

### 39 40 **Figure 3**

41  
42 Amounts of industrially produced *trans* fat (I-TF) in 100 grams of pre-packaged biscuits/cakes/wafers, obtained in  
43 Uzbekistan and in Kazakhstan respectively with each product in the panel placed together with other products  
44 from the same country of origin.  
45  
46  
47  
48  
49  
50

### 51 52 **Figure 4**

1  
2  
3  
4 Date of production and I-TF as percent of total fat for pre-packaged biscuits/cakes/wafers, produced in Russia or  
5 Ukraine, respectively, and obtained in the countries of the former Soviet Union between January 2015 and  
6 January 2017. Products obtained in Samarkand, Sct Petersburg and Kiev 2 were included if the products had their  
7 own *trans* fat analysis. Only products with more than 2% of the fat as I-TF were included.  
8  
9  
10

11  
12  
13  
14  
15 **Table 1**

16  
17 Country of origin for pre-packaged biscuits/cakes/wafers with more than 2% of the fat as I-TF obtained in the 15  
18 countries of the former Soviet Union.  
19  
20

21  
22 **Table 2**

23  
24 Shelf life of pre-packaged biscuits/cakes/wafers produced in Russia or in Ukraine and obtained in the countries of  
25 the former Soviet Union between January 2015 and January 2017.  
26  
27  
28  
29  
30  
31  
32  
33

34  
35 **Contributors:** SS was responsible for the concept design of the study, for collection of food items, registration,  
36 and labelling, and writing the manuscript. SS is the manuscripts guarantor.  
37  
38

39  
40 **Funding:** This work was supported by Jenny Vissings Foundation, University of Copenhagen and Department of  
41 Clinical Biochemistry, Copenhagen University Hospital, Gentofte, Denmark.  
42  
43

44 **Role of the funding source:** The sponsors of the study had no role in the study design, data collection, analysis,  
45 and interpretation, the writing of the report, or the decision to submit the article for publication. The  
46 corresponding author had full access to all the data for the study and had final responsibility for the decision to  
47 submit the manuscript for publication.  
48  
49  
50

51  
52 **Competing interests:** None declared  
53

54  
55 **Ethics approval:** The study does not require an approval from the Ethics committee  
56  
57  
58  
59  
60

1  
2  
3  
4 **Acknowledgements:** The authors acknowledge the support from Jenny Vissings Foundation, University of  
5  
6 Copenhagen and the Department of Clinical Biochemistry, Copenhagen University Hospital, Gentofte, Denmark.  
7

8 **Copyright statement:** The Corresponding Author has the right to grant an exclusive licence on a worldwide basis  
9  
10 to the BMJ Publishing Group LID Publishers and its licensees in perpetuity, in all forms, formats and media  
11  
12 (whether known now or created in the future), to i) publish, reproduce, distribute, display and store the  
13  
14 Contribution, ii) translate the Contribution into other languages, create adaptations, reprints, include within  
15  
16 collections and create summaries, extracts and/or, abstracts of the Contribution, iii) create any other derivative  
17  
18 work(s) based on the Contribution, iv) to exploit all subsidiary rights in the Contribution, v) the inclusion of  
19  
20 electronic links from the Contribution to third party material where-ever it may be located; and, vi) licence any  
21  
22 third party to do any or all of the above.”  
23

24 **Transparency declaration:** Steen Stender (the manuscript’s guarantor) affirms that the manuscript is an honest,  
25  
26 accurate, and transparent account of the study being reported; that no important aspects of the study have been  
27  
28 omitted; and that any discrepancies from the study as planned (and, if relevant, registered) have been explained.  
29

30 **Data sharing statement:** The data used to construct figures 1-4, tables 1 and 2, and supplementary table A and B  
31  
32 can be shared by e-mailing Steen Stender  
33  
34  
35  
36  
37  
38  
39  
40  
41  
42  
43  
44  
45  
46  
47  
48  
49  
50  
51  
52  
53  
54  
55  
56  
57  
58  
59  
60

20

**Table 1** Country of origin for pre-packaged biscuits/cakes/wafers with more than 2% of the fat as *trans* fat obtained in the various countries.

| Country               | Capital               | All*                                  |            | Produced in Russia         |             |            |             | Produced in Ukraine        |           |             |             | Produced in own country    |          |          |            | Produced in other countries |            |          |          |             |            |     |             |
|-----------------------|-----------------------|---------------------------------------|------------|----------------------------|-------------|------------|-------------|----------------------------|-----------|-------------|-------------|----------------------------|----------|----------|------------|-----------------------------|------------|----------|----------|-------------|------------|-----|-------------|
|                       |                       | Trans fat per 100 gram fat $\geq 2\%$ |            | Trans fat per 100 gram fat |             |            |             | Trans fat per 100 gram fat |           |             |             | Trans fat per 100 gram fat |          |          |            | Trans fat per 100 gram fat  |            |          |          |             |            |     |             |
|                       |                       | N                                     | N          | %**                        | Mean        | SD         | Max         | N                          | %**       | Mean        | SD          | Max                        | N        | %**      | Mean       | SD                          | Max        | N        | %**      | Mean        | SD         | Max |             |
| Armenia               | Yerevan               | 91                                    | 50         | 55                         | 17.6        | 8.8        | 50.8        | 33                         | 36        | 25.5        | 13.8        | 50.0                       | 7        | 8        | 20.0       | 8.0                         | 29.6       | 1        | 1        | 10.2        |            |     | 10.2        |
| Belarus               | Minsk                 | 98                                    | 20         | 20                         | 14.8        | 8.5        | 35.5        | 5                          | 5         | 22.5        | 5.6         | 32.0                       | 71       | 72       | 17.4       | 8.9                         | 39.9       | 2        | 2        | 6.8         | 5.4        |     | 10.6        |
| Tadjikistan           | Dushanbee             | 136                                   | 121        | 89                         | 10.9        | 7.0        | 33.4        | 10                         | 7         | 15.0        | 7.7         | 32.9                       | 4        | 3        | 9.1        | 1.7                         | 10.3       | 1        | 1        | 2.7         |            |     | 2.7         |
| Kirgistan             | Bishkek               | 81                                    | 58         | 72                         | 14.9        | 8.3        | 30.3        | 15                         | 19        | 28.6        | 12.9        | 49.7                       | 4        | 5        | 7.0        | 4.1                         | 12.2       | 4        | 5        | 2.8         | 0.6        |     | 3.6         |
| Azerbaijan            | Baku                  | 85                                    | 58         | 68                         | 12.3        | 7.3        | 34.6        | 15                         | 18        | 12.9        | 1.3         | 33.4                       | 1        | 1        | 3.1        |                             | 3.1        | 11       | 13       | 12.5        | 5.5        |     | 21.6        |
| Moldova               | Chisinau              | 53                                    | 10         | 19                         | 24.6        | 7.8        | 35.2        | 25                         | 47        | 25.8        | 8.0         | 41.5                       | 12       | 23       | 10.1       | 5.9                         | 22.2       | 6        | 11       | 12.0        | 11.3       |     | 32.1        |
| Ukraine               | Kiev-1                | 83                                    | 0          | 0                          |             |            |             | 81                         | 98        | 13.8        | 9.7         | 41.6                       |          |          |            |                             |            | 2        | 2        | 4.2         | 1.0        |     | 4.9         |
| <i>Ukraine ***</i>    | <i>Kiev-2</i>         | <i>64</i>                             | <i>0</i>   | <i>0</i>                   |             |            |             | <i>62</i>                  | <i>97</i> | <i>14.3</i> | <i>11.0</i> | <i>45.4</i>                |          |          |            |                             |            | <i>2</i> | <i>3</i> | <i>12.1</i> | <i>0.5</i> |     | <i>12.4</i> |
| Uzbekistan            | Taskent               | 77                                    | 50         | 65                         | 10.3        | 7.5        | 35.2        | 20                         | 26        | 16.2        | 9.6         | 33.4                       | 6        | 8        | 11.2       | 4.6                         | 16.2       | 1        | 1        | 6.7         |            |     | 6.7         |
| <i>Uzbekistan ***</i> | <i>Samarkand</i>      | <i>63</i>                             | <i>30</i>  | <i>48</i>                  | <i>13.5</i> | <i>7.7</i> | <i>29.0</i> | <i>28</i>                  | <i>44</i> | <i>18.7</i> | <i>11.8</i> | <i>42.7</i>                | <i>5</i> | <i>8</i> | <i>4.1</i> | <i>2.5</i>                  | <i>8.4</i> | <i>0</i> | <i>0</i> |             |            |     |             |
| Turkmenistan          | Ashgabat              | 54                                    | 18         | 33                         | 13.3        | 8.0        | 28.9        | 24                         | 44        | 18.4        | 10.6        | 38.0                       | 0        | 0        |            |                             |            | 12       | 22       | 12.6        | 7.3        |     | 26.2        |
| Georgia               | Tblisi                | 47                                    | 23         | 49                         | 15.7        | 9.7        | 36.1        | 8                          | 17        | 21.3        | 9.3         | 34.6                       | 7        | 15       | 23.3       | 9.9                         | 33.3       | 9        | 19       | 7.5         | 4.8        |     | 16.4        |
| Russia                | Moscow                | 75                                    | 75         | 100                        | 9.5         | 5.6        | 27.0        | 0                          | 0         |             |             |                            |          |          |            |                             |            | 0        | 0        |             |            |     |             |
| <i>Russia ***</i>     | <i>Sct Petersburg</i> | <i>105</i>                            | <i>105</i> | <i>100</i>                 | <i>9.3</i>  | <i>5.0</i> | <i>27.0</i> | <i>0</i>                   | <i>0</i>  |             |             |                            |          |          |            |                             |            | <i>0</i> | <i>0</i> |             |            |     |             |
| Kazakhstan            | Astana                | 50                                    | 28         | 56                         | 11.3        | 7.6        | 29.1        | 12                         | 24        | 10.9        | 5.6         | 19.3                       | 7        | 14       | 12.0       | 8.7                         | 28.7       | 3        | 6        | 11.8        | 7.6        |     | 20.5        |
| Lithuania             | Vilnius               | 32                                    | 0          | 0                          |             |            |             | 9                          | 28        | 10.5        | 8.3         | 32.5                       | 9        | 28       | 8.4        | 4.6                         | 15.7       | 14       | 44       | 6.7         | 3.8        |     | 14.0        |
| Latvia                | Riga                  | 24                                    | 5          | 21                         | 9.0         | 3.8        | 12.2        | 4                          | 17        | 8.9         | 3.8         | 14.5                       | 5        | 21       | 5.5        | 4.1                         | 11.3       | 10       | 42       | 6.7         | 3.2        |     | 11.0        |
| Estonia               | Tallinn               | 8                                     | 1          | 13                         | 29.2        |            | 29.2        | 2                          | 25        | 19.3        | 17.0        | 31.3                       | 0        | 0        |            |                             |            | 5        | 63       | 8.0         | 3.6        |     | 11.3        |
| 15 countries together |                       | 994                                   | 517        |                            |             |            |             | 263                        |           |             |             |                            | 133      |          |            |                             |            | 81       |          |             |            |     |             |

All\* is the number in each country of different packages of biscuits/cakes/wafers with  $\geq 2\%$  trans fat per 100 gram fat

%\*\* is the number of samples with more than 2% of the fat as trans fat as percent of all samples obtained in that country with more than 2% of the fat as trans fat

\*\*\* the lines in italic present values for biscuits/cakes/wafers obtained by the same procedure but in ekstra regions of the same country. The values are not included in the bottom line

1  
2  
3  
4  
5  
6  
7  
8  
9  
10  
11  
12  
13  
14  
15  
16  
17  
18  
19  
20  
21  
22  
23  
24  
25  
26  
27  
28  
29  
30  
31  
32  
33  
34  
35  
36  
37  
38  
39  
40  
41  
42  
43  
44  
45  
46  
47

21

**Table 2** Shelf life of pre-packaged biscuits/cakes/wafers produced in Russia and Ukraine

|                              | Produced in Russia |         | Produced in Ukraine |         |
|------------------------------|--------------------|---------|---------------------|---------|
|                              | < 2%               | ≥ 2%    | <2%                 | ≥ 2%    |
| <b>Trans fat as % of fat</b> | < 2%               | ≥ 2%    | <2%                 | ≥ 2%    |
| <b>Number of samples*</b>    | 140                | 453     | 24                  | 220     |
| <b>Shelf life in days</b>    |                    |         |                     |         |
| Mean (SD)                    | 202(83)            | 219(70) | 286(94)             | 215(85) |
| Range                        | 59-547             | 46-396  | 123-366             | 46-546  |

\* Samples obtained in Samarkand, Sct Petersburg, and Kiev-2 were included if these samples had their own trans fat analysis and a readable shelf life on the package

Figure 1

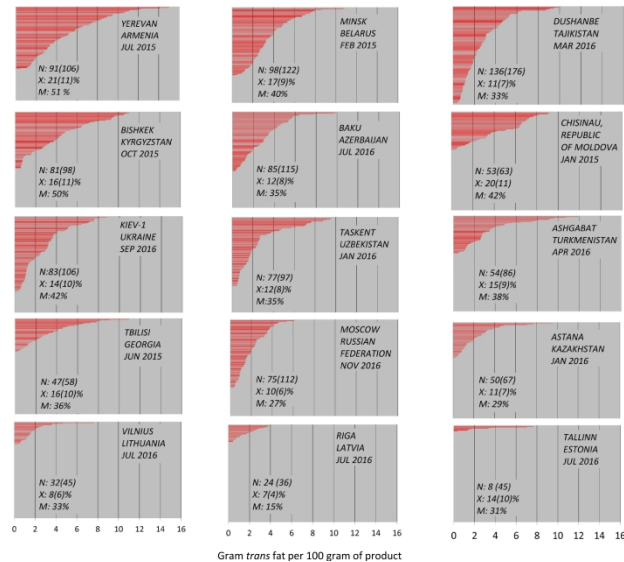

Amounts of industrially produced trans fat (I-TF) in 100 grams of pre-packaged biscuits/cakes/wafers purchased in 2015-2016 in three supermarkets in each of the 15 capitals. Each bar in a panel represents a unique product bought in that capital, i.e., none of the products in a given panel had the same barcode number. N is the number of different products with more than 2 % TF of the total fat content. (N) is the number of packages that fulfilled the inclusion criteria. X is the mean value and the standard deviation of the percentages of I-TF in the total fat of the N products, M is the maximal value of I-TF as percent of total fat. Each bar in all of the 15 panels has the same thickness, which means that the area of the bars is comparable between the different panels.

338x190mm (300 x 300 DPI)

Figure 2

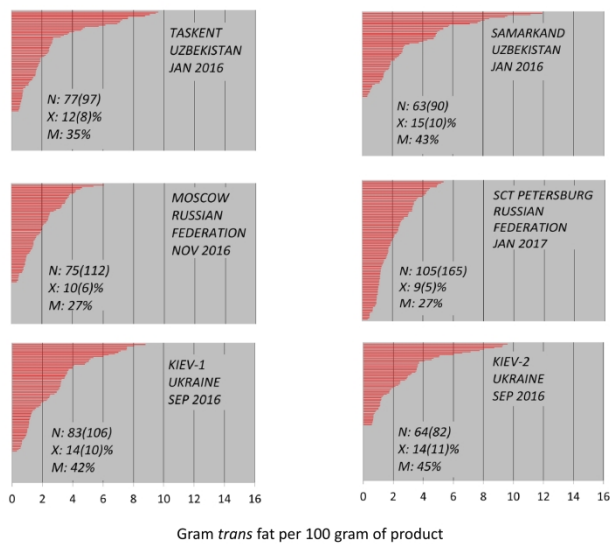

The legend for this figure is similar to the legend for Figure 1. The 4 upper panels show the result for 2 of the capitals and for 2 other large cities in the same country. The lowest 2 panels give the results from the purchase in 3 large supermarkets in Kiev (Kiev-1) and in 3 other large supermarkets in the same city (Kiev-2).

338x190mm (300 x 300 DPI)

Figure 3

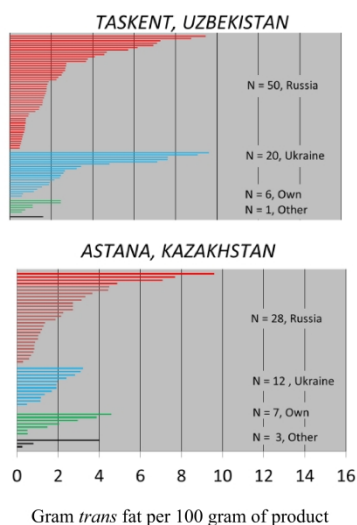

Amounts of industrially produced trans fat (I-TF) in 100 grams of pre-packaged biscuits/cakes/wafers, obtained in Uzbekistan and in Kazakhstan respectively with each product in the panel placed together with other products from the same country of origin.

338x190mm (300 x 300 DPI)



Figure 4

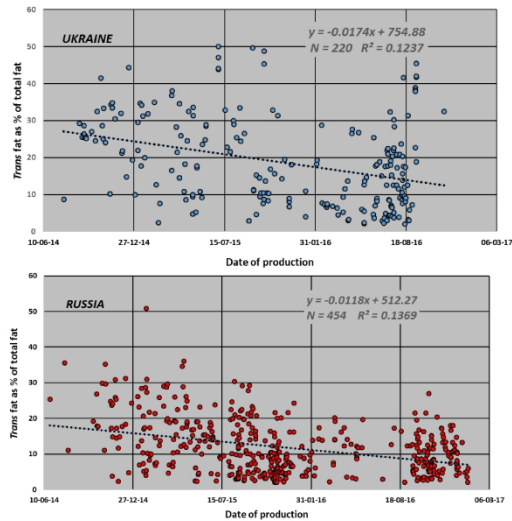

Date of production and I-TF as percent of total fat for pre-packaged biscuits/cakes/wafers, produced in Russia or Ukraine, respectively, and obtained in the countries of the former Soviet Union between January 2015 and January 2017. Products obtained in Samarkand, Sct Petersburg and Kiev 2 were included if the products had their own trans fat analysis. Only products with more than 2% of the fat as I-TF were included.

338x190mm (300 x 300 DPI)

## Supplementary table A

Names and population of the countries of the former Soviet Union and the mortalities of coronary heart disease(CHD) and cardiovascular disease (CVD)

| Country             | Capital  | Visit<br>Month | Visit<br>Year | Capital<br>population<br>millions* | Country<br>population<br>millions* | Year | CHD-mortality<br>male<br>per 100.000 | CVD-mortality<br>male<br>per 100.000 | Year | CHD-mortality<br>female<br>per 100.000 | CVD-mortality<br>female<br>per 100.000 |
|---------------------|----------|----------------|---------------|------------------------------------|------------------------------------|------|--------------------------------------|--------------------------------------|------|----------------------------------------|----------------------------------------|
| Republic of Moldova | Chisinau | Jan            | 2015          | 0.669                              | 3.6                                | 2014 | 528                                  | 790                                  | 2012 | 365                                    | 564                                    |
| Belarus             | Minsk    | Feb            | 2015          | 1.893                              | 9.5                                | 2016 | 642                                  | 893                                  | 2009 | 284                                    | 428                                    |
| Georgia             | Tbilisi  | Jun            | 2015          | 1.173                              | 3.7                                | 2016 | 80                                   | 325                                  | 2010 | 39                                     | 190                                    |
| Armenia             | Yerevan  | Jul            | 2015          | 1.06                               | 3.0                                | 2016 | 352                                  | 525                                  | 2012 | 211                                    | 357                                    |
| Kyrgyzstan          | Bishkek  | Oct            | 2015          | 0.871                              | 5.5                                | 2009 | 534                                  | 842                                  | 2010 | 373                                    | 588                                    |
| Kazakhstan          | Astana   | Jan            | 2016          | 0.639                              | 17.7                               | 2016 | 265                                  | 810                                  | 2010 | 124                                    | 485                                    |
| Uzbekistan          | Taskent  | Jan            | 2016          | 2.31                               | 31.6                               | 2016 | 454                                  | 858                                  | 2005 | 321                                    | 662                                    |
| Tajikistan          | Dushanbe | Mar            | 2016          | 0.779                              | 8.6                                | 2015 | 304                                  | 710                                  | 2004 | 186                                    | 504                                    |
| Turkmenistan        | Ashgabat | Apr            | 2016          | 1.031                              | 6.7                                | 2011 | 563                                  | 1017                                 | 1998 | 333                                    | 717                                    |
| Estonia             | Tallinn  | Feb            | 2016          | 0.444                              | 1.3                                | 2016 | 256                                  | 501                                  | 2012 | 118                                    | 269                                    |
| Latvia              | Riga     | Jul            | 2016          | 0.43                               | 2.0                                | 2014 | 355                                  | 655                                  | 2012 | 174                                    | 353                                    |
| Lithuania           | Vilnius  | Jul            | 2016          | 0.537                              | 2.9                                | 2016 | 436                                  | 667                                  | 2010 | 239                                    | 383                                    |
| Azerbaijan          | Baku     | jul            | 2016          | 2.182                              | 9.8                                | 2016 | 149                                  | 617                                  | 2007 | 93                                     | 489                                    |
| Ukraine             | Kiev     | Sep            | 2016          | 2.847                              | 42.5                               | 2013 | 600                                  | 873                                  | 2012 | 356                                    | 533                                    |
| Russian Federation  | Moscow   | Nov            | 2015          | 13.197                             | 146.7                              | 2016 | 501                                  | 915                                  | 2010 | 255                                    | 517                                    |
| UK                  |          |                |               |                                    |                                    |      | 111                                  | 205                                  | 2010 | 49                                     | 129                                    |
| Denmark             |          |                |               |                                    |                                    |      | 67                                   | 174                                  | 2011 | 33                                     | 111                                    |

\* Values from Wikipedia.<sup>18</sup> Mortalities from <sup>10</sup>

**Supplementary table B:**

Number of samples obtained from the various countries and the number and percentages of samples that were analysed for *trans* fat (TF)  
 Samples that were not analysed received their TF values from similar products that already have been analysed.

| Country                              | Capital               | All *samples    |           |            | Samples with <i>trans</i> fat per 100 gram fat < 2% |           |           | Samples with <i>trans</i> fat per 100 gram fat ≥2% |           |           |
|--------------------------------------|-----------------------|-----------------|-----------|------------|-----------------------------------------------------|-----------|-----------|----------------------------------------------------|-----------|-----------|
|                                      |                       | Analysed for TF |           |            | Analysed for TF                                     |           |           | Analysed for TF                                    |           |           |
|                                      |                       | N-all           | N         | % of N-all | N<2%                                                | N         | % of N<2% | N≥2%                                               | N         | % of N≥2% |
| Armenia                              | Yerevan               | 106             | 106       | 100        | 15                                                  | 15        | 100       | 91                                                 | 91        | 100       |
| Belarus                              | Minsk                 | 122             | 122       | 100        | 24                                                  | 24        | 100       | 98                                                 | 98        | 100       |
| Tadjikistan                          | Dushanbee             | 176             | 121       | 69         | 40                                                  | 32        | 80        | 136                                                | 89        | 65        |
| Kirgistan                            | Bishkek               | 98              | 98        | 100        | 17                                                  | 17        | 100       | 81                                                 | 81        | 100       |
| Azerbaijan                           | Baku                  | 115             | 58        | 50         | 30                                                  | 19        | 63        | 85                                                 | 39        | 46        |
| Moldova                              | Chisinau              | 63              | 63        | 100        | 10                                                  | 10        | 100       | 53                                                 | 53        | 100       |
| Ukraine                              | Kiev-1                | 106             | 84        | 79         | 23                                                  | 19        | 83        | 83                                                 | 65        | 78        |
| <i>Ukraine **</i>                    | <i>Kiev-2</i>         | <i>82</i>       | <i>40</i> | <i>49</i>  | <i>18</i>                                           | <i>7</i>  | <i>39</i> | <i>64</i>                                          | <i>33</i> | <i>52</i> |
| Uzbekistan                           | Taskent               | 97              | 63        | 65         | 20                                                  | 12        | 60        | 77                                                 | 51        | 66        |
| <i>Uzbekistan **</i>                 | <i>Samarkand</i>      | <i>90</i>       | <i>31</i> | <i>34</i>  | <i>27</i>                                           | <i>10</i> | <i>37</i> | <i>63</i>                                          | <i>21</i> | <i>33</i> |
| Turkmenistan                         | Ashgabat              | 86              | 56        | 65         | 32                                                  | 28        | 88        | 54                                                 | 28        | 52        |
| Georgia                              | Tblisi                | 58              | 58        | 100        | 11                                                  | 11        | 100       | 47                                                 | 47        | 100       |
| Russia                               | Moscow                | 112             | 99        | 88         | 37                                                  | 31        | 84        | 75                                                 | 68        | 91        |
| <i>Russia **</i>                     | <i>Sct Petersburg</i> | <i>165</i>      | <i>69</i> | <i>42</i>  | <i>60</i>                                           | <i>20</i> | <i>33</i> | <i>105</i>                                         | <i>49</i> | <i>47</i> |
| Kazakhstan                           | Astana                | 67              | 44        | 66         | 17                                                  | 15        | 88        | 50                                                 | 29        | 58        |
| Lithuania                            | Vilnius               | 45              | 34        | 76         | 13                                                  | 11        | 85        | 32                                                 | 23        | 72        |
| Latvia                               | Riga                  | 36              | 27        | 75         | 12                                                  | 12        | 100       | 24                                                 | 15        | 63        |
| Estonia                              | Tallinn               | 45              | 35        | 78         | 37                                                  | 28        | 76        | 8                                                  | 7         | 88        |
| 15 countries and 3 extra regions     |                       | 1669            | 1208      | 72         | 440                                                 | 321       | 73        | 1226                                               | 887       | 72        |
| 15 countries without 3 extra regions |                       | 1332            | 1068      | 80         | 335                                                 | 284       | 85        | 994                                                | 784       | 79        |

All\* is the number in each country of different packages of biscuits/cakes/wafers that fulfilled the inclusion criteria  
 \*\* the lines in italic present values for biscuits/cakes/wafers obtained by the same procedure but in extra regions in the same country

STROBE Statement—Checklist of items that should be included in reports of *cross-sectional studies*

Manuscript ID bmjopen-2018-023184 entitled "Industrially produced trans fat in popular foods in 2015-2016 in 15 countries of the former Soviet Union: a market basket investigation  
12-9-2018

|                              | Item No | Recommendation                                                                                                                                                                                                                                                                                                                                                                                                                                                  |
|------------------------------|---------|-----------------------------------------------------------------------------------------------------------------------------------------------------------------------------------------------------------------------------------------------------------------------------------------------------------------------------------------------------------------------------------------------------------------------------------------------------------------|
| <b>I Title and abstract</b>  | 1       | (a) Indicate the study's design with a commonly used term in the title or the abstract <b>line 5</b><br>(b) Provide in the abstract an informative and balanced summary of what was done and what was found <b>Lines 26-37</b>                                                                                                                                                                                                                                  |
| <b>Introduction</b>          |         |                                                                                                                                                                                                                                                                                                                                                                                                                                                                 |
| Background/rationale         | 2       | Explain the scientific background and rationale for the investigation being reported <b>Lines 68-79</b>                                                                                                                                                                                                                                                                                                                                                         |
| Objectives                   | 3       | State specific objectives, including any prespecified hypotheses <b>Lines 102-103</b>                                                                                                                                                                                                                                                                                                                                                                           |
| <b>Methods</b>               |         |                                                                                                                                                                                                                                                                                                                                                                                                                                                                 |
| Study design                 | 4       | Present key elements of study design early in the paper <b>Lines 107-120</b>                                                                                                                                                                                                                                                                                                                                                                                    |
| Setting                      | 5       | Describe the setting, locations, and relevant dates, including periods of recruitment, exposure, follow-up, and data collection <b>Supplementary table A</b>                                                                                                                                                                                                                                                                                                    |
| Participants                 | 6       | (a) Give the eligibility criteria, and the sources and methods of selection of participants <b>Lines 107-120</b>                                                                                                                                                                                                                                                                                                                                                |
| Variables                    | 7       | Clearly define all outcomes, exposures, predictors, potential confounders, and effect modifiers. Give diagnostic criteria, if applicable <b>Lines 145-166</b>                                                                                                                                                                                                                                                                                                   |
| Data sources/<br>measurement | 8*      | For each variable of interest, give sources of data and details of methods of assessment (measurement). Describe comparability of assessment methods if there is more than one group <b>Lines 145-151</b>                                                                                                                                                                                                                                                       |
| Bias                         | 9       | Describe any efforts to address potential sources of bias <b>Lines 157-166</b>                                                                                                                                                                                                                                                                                                                                                                                  |
| Study size                   | 10      | Explain how the study size was arrived at <b>Lines 22-25</b>                                                                                                                                                                                                                                                                                                                                                                                                    |
| Quantitative variables       | 11      | Explain how quantitative variables were handled in the analyses. If applicable, describe which groupings were chosen and why <b>Line 31</b>                                                                                                                                                                                                                                                                                                                     |
| Statistical methods          | 12      | (a) Describe all statistical methods, including those used to control for confounding <b>Lines 172-174</b><br>(b) Describe any methods used to examine subgroups and interactions <b>NA</b><br>(c) Explain how missing data were addressed <b>Lines 138-144, Supplementary table B</b><br>(d) If applicable, describe analytical methods taking account of sampling strategy <b>Lines 145-151</b><br>(e) Describe any sensitivity analyses <b>Lines 130-135</b> |
| <b>Results</b>               |         |                                                                                                                                                                                                                                                                                                                                                                                                                                                                 |
| Participants                 | 13*     | (a) Report numbers of individuals at each stage of study—eg numbers potentially eligible, examined for eligibility, confirmed eligible, included in the study, completing follow-up, and analysed <b>Table 1</b><br>(b) Give reasons for non-participation at each stage <b>NA</b><br>(c) Consider use of a flow diagram <b>NA</b>                                                                                                                              |
| Descriptive data             | 14*     | (a) Give characteristics of study participants (eg demographic, clinical, social) and information on exposures and potential confounders <b>Lines 107-120</b><br>(b) Indicate number of participants with missing data for each variable of interest                                                                                                                                                                                                            |

**Supplementary table B**

|                          |     |                                                                                                                                                                                                                                                                                                                                                                                                                                                  |
|--------------------------|-----|--------------------------------------------------------------------------------------------------------------------------------------------------------------------------------------------------------------------------------------------------------------------------------------------------------------------------------------------------------------------------------------------------------------------------------------------------|
| Outcome data             | 15* | Report numbers of outcome events or summary measures <b>Figure 1 and Table 1</b>                                                                                                                                                                                                                                                                                                                                                                 |
| Main results             | 16  | (a) Give unadjusted estimates and, if applicable, confounder-adjusted estimates and their precision (eg, 95% confidence interval). Make clear which confounders were adjusted for and why they were included <b>NA</b><br>(b) Report category boundaries when continuous variables were categorized <b>Line 31</b><br>(c) If relevant, consider translating estimates of relative risk into absolute risk for a meaningful time period <b>NA</b> |
| Other analyses           | 17  | Report other analyses done—eg analyses of subgroups and interactions, and sensitivity analyses <b>Lines 212-221</b>                                                                                                                                                                                                                                                                                                                              |
| <b>Discussion</b>        |     |                                                                                                                                                                                                                                                                                                                                                                                                                                                  |
| Key results              | 18  | Summarise key results with reference to study objectives <b>Lines 231-238</b>                                                                                                                                                                                                                                                                                                                                                                    |
| Limitations              | 19  | Discuss limitations of the study, taking into account sources of potential bias or imprecision. Discuss both direction and magnitude of any potential bias <b>Lines 271-282</b>                                                                                                                                                                                                                                                                  |
| Interpretation           | 20  | Give a cautious overall interpretation of results considering objectives, limitations, multiplicity of analyses, results from similar studies, and other relevant evidence <b>Lines 320-322</b>                                                                                                                                                                                                                                                  |
| Generalisability         | 21  | Discuss the generalisability (external validity) of the study results <b>Lines 260-268</b>                                                                                                                                                                                                                                                                                                                                                       |
| <b>Other information</b> |     |                                                                                                                                                                                                                                                                                                                                                                                                                                                  |
| Funding                  | 22  | Give the source of funding and the role of the funders for the present study and, if applicable, for the original study on which the present article is based <b>Lines 434-435</b>                                                                                                                                                                                                                                                               |

\*Give information separately for exposed and unexposed groups.

**Note:** An Explanation and Elaboration article discusses each checklist item and gives methodological background and published examples of transparent reporting. The STROBE checklist is best used in conjunction with this article (freely available on the Web sites of PLoS Medicine at <http://www.plosmedicine.org/>, Annals of Internal Medicine at <http://www.annals.org/>, and Epidemiology at <http://www.epidem.com/>). Information on the STROBE Initiative is available at [www.strobe-statement.org](http://www.strobe-statement.org).

# BMJ Open

## Industrially produced trans fat in popular foods in 2015-2016 in 15 countries of the former Soviet Union: a market basket investigation

|                                 |                                                                                                                                                 |
|---------------------------------|-------------------------------------------------------------------------------------------------------------------------------------------------|
| Journal:                        | <i>BMJ Open</i>                                                                                                                                 |
| Manuscript ID                   | bmjopen-2018-023184.R2                                                                                                                          |
| Article Type:                   | Research                                                                                                                                        |
| Date Submitted by the Author:   | 21-Nov-2018                                                                                                                                     |
| Complete List of Authors:       | Stender, Steen; Kobenhavns Universitet Det Natur- og Biovidenskabelige Fakultet, Nutrition Exercise and Sports                                  |
| <b>Primary Subject Heading</b>: | Health policy                                                                                                                                   |
| Secondary Subject Heading:      | Health policy, Global health, Public health                                                                                                     |
| Keywords:                       | Coronary heart disease < CARDIOLOGY, NUTRITION & DIETETICS, Health policy < HEALTH SERVICES ADMINISTRATION & MANAGEMENT, central asia trans fat |
|                                 |                                                                                                                                                 |

SCHOLARONE™  
Manuscripts

1

19-11-2018

**Industrially produced *trans* fat in popular foods in 2015-2016 in 15 countries of the former Soviet Union: a market basket investigation**

**Steen Stender, Professor, MD, DMSci**

**Steen Stender, Department of Nutrition, Exercise and Sports, University of Copenhagen, Rolighedsvej 26, Frederiksberg, 1958 DK, Denmark**

**Correspondence to: S Stender [stender@nexs.ku.dk](mailto:stender@nexs.ku.dk)**

**Telephone number: +45 35333162**

**Telephone number: +45 40258601**

**Key Words:** Coronary heart disease, Health policy, Nutrition, Soviet Union, *Trans* fat

2

**ABSTRACT**

**Objective:** To minimize the intake of industrially produced *trans* fat (I-TF) and thereby decrease the risk of coronary heart disease (CHD), several countries have implemented a legislative restriction on I-TF in foods. The objective of this study was to investigate the presence of I-TF in biscuits/cakes/wafers in 15 countries of the former Soviet Union, all with a high coronary mortality compared with countries in Western Europe.

**Design:** Three large supermarkets were visited in the 15 capitals in 2015 or 2016. Pre-packaged biscuits/cakes/wafers were bought if the list of ingredients disclosed that the product contained more than 15 grams fat per 100 grams of product and if partially hydrogenated fat or a similar term, including margarine, refined fat or confectionary fat, were mentioned. Samples of the foods were subsequently analysed for total fat and TF.

**Results:** Some 994 products had more than 2% of total fat as I-TF (illegal in Denmark). In Armenia, 91 different products had a mean value (SD) of 21(11) % of the fat as I-TF. In Estonia, there were 8 products with 14(10) % of the fat as I-TF. The other 13 countries had values in between. In several countries a major part of the products were imported from Russia and Ukraine. Many of these products had a readable production date and a best before date. The mean shelf life (SD) of 673 packages was 218 (75) days. The % TF in the fat of products produced in Russia and in Ukraine in relation to the date of production both declined with approximately 10 % points during the 2 years collection period.

**Conclusions:** The findings suggest that I-TF is used in popular foods in all 15 countries of the former Soviet Union. It opens a possibility for some reduction of the high coronary mortality in these countries.

**Strengths and limitation of this study**



- A strength of this study is that the presence of industrially produced *trans* fat in popular foods for the first time is systematically investigated in each of the 15 countries of the former Soviet Union that all have a high coronary mortality and a population of nearly 300 million.
- A limitation of the study is that only pre-packaged biscuits/cakes/wafers were investigated for *trans* fat and no other food groups such as shortenings and margarines and no un-packaged foods such as baked goods, sweet rolls, pastries, buns and even un-packaged biscuits/cakes/wafers were investigated.
- A limitation is the assumption that if the inclusion words are not present in the list of ingredients, the product contains less than 2% of the total fat as *trans* fat.
- Another limitation is that the average daily intake of *trans* fat was not measured in any subgroups of the populations, but instead was inferred from the availability of popular foods with high amounts of *trans* fat in large supermarkets.

## INTRODUCTION

High amounts of *trans* fat (TF) in food i.e. more than 5 % TF of total fat in the food originate from the industrial hydrogenation of edible oils. Compared to non-hydrogenated oils, fats containing industrially produced *trans* fat (I-TF) are solid at room temperature, have some technical advantages for food processing, and prolong the shelf life of products. TF are not synthesized in the human body and are not required in the diet, but is absorbed and metabolized. I-TF can be found at varying amounts in biscuits, pastries, margarine, spreads, confectionary creams and fillings and fried foods such as potato crisps. Fat from ruminants, for instance in dairy products, contains up to 5 % TF (R-TF), which is considerably lower than the up to 50% TF that may be present in partially hydrogenated fat for human food. In a double blind, randomised controlled trial in humans R-TF resulted in the same increase in LDL-cholesterol in blood compared with I-TF when the two different types of fat were given in the diet in same amounts.<sup>1</sup> It suggests that R-TF and I-TF have similar harmful effect on plasma lipoproteins.

Observational studies suggest an association between dietary intake of I-TF and increased risk of coronary heart disease (CHD).<sup>2</sup> The association is further corroborated by an association between plasma TF level and CHD.<sup>3</sup>

1  
2  
3  
4 Plausible mechanisms for the association involving an increase in plasma LDL-cholesterol<sup>4</sup> and unfavourable  
5  
6 “beyond lipid effects” on inflammatory cells important for atherogenesis<sup>5</sup> suggest a causal relationship, even in  
7  
8 the absence of randomized studies with hard clinical endpoints.<sup>6</sup> Based on the available evidence, Denmark in  
9  
10 2004 and some counties in New York State, USA in 2007, legally restricted the use of I-TF in the diet. After the  
11  
12 restrictions in Denmark there was a 4.3% lower yearly mortality rate due to CHD beyond temporal trends.<sup>7</sup> A  
13  
14 similar decline of 4.5 % in CHD mortality rate was found in the counties with restriction in New York State  
15  
16 compared with similar counties without restrictions.<sup>8</sup> Three and more years after the restriction in the counties, a  
17  
18 hospital admission rate for myocardial infarction and stroke events combined was 6.2 % lower than in similar  
19  
20 counties without restrictions.<sup>9</sup> These findings from 2 different groups of researchers, strongly suggest that I-TF in  
21  
22 the diet promotes CHD and a restriction in its use reduces CHD. What remains to be explored is to what extent I-  
23  
24 TF still is used in popular foods in countries with high rates of CHD-mortalities.  
25  
26

27  
28 The 15 countries of the former Soviet Union all have an extraordinarily high rate of CHD mortality compared  
29  
30 with countries in Western Europe.<sup>10</sup> (supplementary table A) In a systematic analysis, including 266 country-  
31  
32 specific nutrition surveys, the average consumption of TF in 2010 in Central Asia and Eastern Europe that  
33  
34 together include the 15 countries of the former Soviet Union, for adults of more than 20 years, were 0.9% of total  
35  
36 energy intake.<sup>11</sup> This intake corresponds to approximately 2.5 gram TF per day per adult and is less than the 1% of  
37  
38 total energy percent recommended by WHO. The consumption level was found stable since 1990. Among the  
39  
40 world’s 21 different regions Central Asia and Eastern Europe were placed as number 5 and 8, respectively with  
41  
42 the lowest average consumption of TF, suggesting that intake of TF is a minor health problem in these countries.  
43  
44 However, the investigators mention the relatively limited data availability on TF consumption in most of these  
45  
46 nations compared with other major dietary factors.<sup>11</sup> Furthermore a low average intake of TF in a nation does not  
47  
48 exclude a high intake of TF in subgroups of the population if popular foods contain high amounts of I-TF.

49  
50 Some recent Russian studies, with an abstract in English, mention the harmful effect on health of dietary I-TF  
51  
52 and pledge for a removal of I-TF from margarine “to preserve the health of Russia’s population”.<sup>12,13</sup> A study  
53  
54 from Estonia reports about high I-TF in blended spreads, margarines and shortenings bought in the Estonian retail  
55  
56 market in 2011.<sup>14</sup> Additionally, technical reports from the WHO find several types of street foods with high  
57  
58 amounts of TF in Dushanbe, Tajikistan, April/May 2016, and in Bishkek, Kyrgyzstan, June/July 2016.<sup>15</sup> In a  
59  
60

1  
2  
3  
4 recent systematic review of TF intake and its dietary sources in general populations worldwide based on data from  
5  
6 29 different countries and a demonstration of a substantial reduction in I-TF in many countries, none of the  
7  
8 countries of the former Soviet Union were included, either for the intake of the general population or for the  
9  
10 study's secondary research question about the composition of fat in biscuits, because of the lack of data.<sup>16</sup>  
11  
12 Apparently, there is a pronounced scarcity of newer internationally published data about I-TF in foods in most of  
13  
14 these countries. The purpose of the present study was to investigate the presence of I-TF in popular foods in the  
15  
16 15 countries of the former Soviet Union by a newly developed market basket method.<sup>17</sup>  
17  
18  
19  
20  
21

## 22 **METHODS**

### 23 **Purchase of biscuits/cakes/wafers in supermarkets**

24  
25  
26  
27  
28 By using Wikipedia and local tourist information offices, three large supermarkets were identified in each capital,  
29  
30 preferably chain supermarkets with many large shops across the country.<sup>18</sup> Pre-packaged biscuits/cakes/wafers  
31  
32 were chosen as the food to be investigated for TF in this study because these types of foods are frequently  
33  
34 consumed, easily accessible, and transportable at ambient temperature. Furthermore, these foods traditionally  
35  
36 contain I-TF-rich, partially hydrogenated vegetable oils as their major lipid ingredient, and I-TF has previously  
37  
38 been found in these foods in high concentrations in some countries in Eastern Europe.<sup>19-21</sup> The packages of  
39  
40 biscuits/cakes/wafers were obtained in each supermarket by systematically examining the labels of the products.  
41  
42 Packages were purchased if they met the following criteria on the list of ingredients:  
43  
44

- 45 • Total fat content was equal to or exceeded 15 g per 100 g of product.
- 46  
47 • Listed one or more of the terms: partially hydrogenated fat, hydrogenated fat, hardened fat, refined fat,  
48  
49 confectionary fat, deodorized fat, all-purpose fat or margarine.
- 50  
51 • If the list of ingredients indicated *trans* fat > 0 g, these foods were also included.
- 52  
53 • Packages with the term 'unhydrogenated fat' or 'fully hydrogenated fat' or 'no *trans* fat' were not  
54  
55  
56  
57  
58  
59  
60 purchased.

1  
2  
3  
4 If the same package with the same barcode number was found in more than one of the three different  
5 supermarkets in the same capital, only the package with the most recent production date was included in the study.  
6  
7 Each package was subsequently labelled with an ID-number, and duplicate samples each of approximately 50  
8 grams of the product were taken for analysis. The barcode number, the name of the producer, the country of origin  
9 and, if available, the best before date as well as the production date were registered, and the empty packages were  
10 stored. The first 2 digits (sometimes three digits) in the barcode number identify the country or economic region  
11 numbering authority which assigned the manufacturer code. The Russian Federation uses the code 46, Ukraine the  
12 code 482. The manufacturer code is the next 5 digits followed by the product code, consisting of 5 digits. The last  
13 digit is the check digit.<sup>22</sup>  
14  
15  
16  
17  
18  
19  
20  
21  
22

23 To investigate to what extent the presence of biscuits/cakes/wafers in the capital differed from other parts of the  
24 country, biscuits/cakes/wafers were obtained in 3 different supermarkets in each of 2 different regions of the 2  
25 large countries Uzbekistan and Russia: in Uzbekistan also in the second largest city Samarkand (0.4 million  
26 inhabitants and approximately 300 km from Taskent) and in Russia also in Sct. Petersburg (5.2 million inhabitants  
27 and approximately 800 km from Moscow). The third large country was Ukraine. In its capital Kiev, 3 other large  
28 supermarkets were visited (Kiev-2) in addition to the first 3 that were visited (Kiev-1).  
29  
30  
31  
32  
33  
34  
35  
36  
37  
38

### 39 **Analysis of TF**

40  
41 The samples from the various countries were analysed successively and in the order they were obtained. Samples  
42 obtained in the first countries that were visited (Moldova, Belarus, Georgia, Armenia and Kyrgyzstan) were all  
43 analysed for TF. In the other countries that were visited later some packages were obtained with the same barcode  
44 number, and the same visual appearance and list of ingredients as on packages where the samples already were  
45 analysed. A sample from the newly found package was analysed only if the best before date on that package  
46 exceeded the best before date by more than 12 months on a package that already had been analysed. Otherwise,  
47 the TF values were carried forward to the new package.(supplementary table B)  
48  
49  
50  
51  
52  
53  
54  
55

56 For analysis the foods were homogenized, and the fatty acid content was analysed using gas  
57 chromatography on a 66-m highly polar capillary column, using a modification of the AOAC 996.06  
58  
59  
60

1  
2  
3  
4 method. Two procedures were modified in minor ways. The final step of the extraction/methylation calls for  
5  
6 1 mL of hexane to be added in accordance with AOAC.996.06. In the modified method, 4mL were added.  
7  
8 This is done to alleviate the dilution that needs done at the instrument. The levels of the instrument are low  
9  
10 and sample results are over range. This procedure cuts down on any possible error by only having one  
11  
12 dilution. The method also calls for two forms of C11:0 undecanoic acid to be used as surrogate and internal  
13  
14 standard. In the modified method C11:0 triundecanoin was used as an internal standard as per method and  
15  
16 calculate it throughout the analysis alleviating the need for another form to be used as surrogate.  
17  
18  
19  
20  
21  
22

23 . The method makes it possible to get total fat as triglycerides, which are then broken down into mono-, poly-  
24  
25 , saturated- and total TF. Total TF may consist of up to 8 different *trans* fatty acids. All analytical work on  
26  
27 samples was conducted by Microbac Laboratories in Warrendale, Pennsylvania, USA, The laboratory  
28  
29 undergo annual proficiency testing and are audited every other year to ensure compliance of this method to  
30  
31 ISO 17025.  
32  
33

34 From the peaks in the chromatogram TF is calculated as a fraction (percent) of total fat in the product. This  
35  
36 value is primarily of interest for food producers, food chemists and food legislators. The total amount of fat  
37  
38 in 100 grams of the product is determined from the chromatogram. When that value is multiplied by the TF-  
39  
40 fraction the amounts of TF in gram per 100 grams of the product appear. This value is primarily of interest  
41  
42 for the customers and for investigators of the health effect of intake of TF.  
43  
44

45 The measurement does not distinguish I-TF from R-TF. If butter as a ruminant fat has been used in the product in  
46  
47 addition to partially hydrogenated vegetable oil, some of the TF in the product may be derived from butter that on  
48  
49 average contains a few percent and maximum 5 % of the fat as R-TF. In this paper, the term I-TF is used even  
50  
51 though a minor portion in certain products may be TF derived from ruminant fat. If butter is present in a product  
52  
53 which have been analysed for TF in the present study and the value is higher than 5% TF of total fat, butter has  
54  
55 diluted the I-TF in the product, because butter adds more non-TF than it adds TF. Values larger than 5% TF in the  
56  
57 product are consequently minimum values for I-TF as percent of total fat. In products with less than 5% TF as  
58  
59  
60

8

1  
2  
3  
4 percent of total fat that contain butter, the I-TF will be lower than the TF value. Such products are because of their  
5  
6 low amounts of TF per 100 gram of product of less importance for the health of the consumer than products with  
7  
8 much higher TF values and of less interest for health authorities and food scientists.  
9

## 10 **Patient and Public involvement**

11  
12  
13  
14 Patients and public were not involved in the present study.  
15  
16  
17  
18  
19  
20  
21

## 22 **Statistical analysis**

23  
24  
25 For each country, simple linear regression models were used to describe the change in % TF of total fat as a  
26  
27 function of shelf life and over time recorded as date of production. The statistical software R was used (R Core  
28  
29 Team, 2017).  
30  
31  
32  
33  
34  
35

## 36 **RESULTS**

37  
38 The number of different packages obtained in 3 different supermarkets in each of the 15 capitals totalled 1332.  
39  
40 Samples from 1068 packages were analysed, and TF values for each of the remaining 264 packages were taken  
41  
42 from a similar package with an identical barcode but obtained earlier in another country and already analysed.  
43  
44 Some 994 samples had more than 2% of the fat as TF. The different products in each country were ranked  
45  
46 according to I-TF level, expressed as grams per 100 g of the product (figure 1). This latter value tells how much  
47  
48 TF the consumer gets when 100 grams of the product is consumed. Each horizontal bar in each panel represents a  
49  
50 product with more than 2% of the fat as TF. The number of these products is shown together with the number of  
51  
52 packages, given in parenthesis that fulfilled the inclusion criteria. The products depicted in each panel are all  
53  
54 different, but the same product may appear in the panels for two or more countries. The mean values of the  
55  
56 percentages of fat that were I-TF in the collection of different products from each of the countries, together with  
57  
58 the SD and maximum values are shown. These percentages are of interest for food producers and for food  
59  
60

1  
2  
3  
4 authorities because they describe the fat that has been used in the food. In some products obtained in Armenia and  
5  
6 in Kyrgyzstan about 50 % of the fat was I-TF. (figure 1)  
7  
8

9 In the second largest city, Samarkand, in Uzbekistan, 29% of the packages were similar based on the barcode  
10 number to the packages found in the capital, Taskent. In Sct Petersburg, Russia, 30% were similar to the products  
11 found in Moscow, and in Kiev-2, the second region of collection, 48% were similar to the packages found in the  
12 first region of collection, Kiev-1. Even though most products were different in the 2 different regions of the same  
13 country, the panels that reflect the availability of biscuits/cakes/wafers with more than 2 % TF in the fat are rather  
14 similar (figure 2). This suggests that the panels presented for each country in figure 1 represent a pattern found  
15 elsewhere in the country and not only in the capital.  
16  
17  
18  
19  
20  
21  
22  
23

24 For the 994 products with more than 2% of the fat as I-TF and obtained in the 15 capitals of the former Soviet  
25 Union, 52% were produced in Russia, 26% in Ukraine, 13% in own country, and 8 % in some other countries for  
26 instance Poland and Bulgaria (table 1). For the products produced in Russia, 85% were obtained outside Russia, in  
27 the other countries of the former Soviet Union combined, not including Ukraine and Lithuania. For the products  
28 produced in Ukraine, 69% were obtained outside Ukraine in the other countries, excluding Russia. The import  
29 patterns of pre-packaged biscuits/cakes/wafers differed from country to country exemplified by the patterns  
30 observed for Uzbekistan and Kazakhstan. (figure 3) The concentrations in grams of TF per 100 grams of product  
31 are in a panel for each of the two countries, depicted with each product placed together with other products from  
32 the same country of origin. The numbers and the mean values of the concentrations of TF in the fat of pre-  
33 packaged biscuits/cakes/wafers produced in Russia and in Ukraine but obtained in the various countries of the  
34 former Soviet Union are shown in table 1. All of the 75 different products with more than 2% of the fat as TF  
35 obtained in Moscow were produced in Russia, and 81 of the 83 different products obtained in Kiev-1 were  
36 produced in Ukraine. The same pattern was seen in Sct Petersburg, Russia and in Kiev-2, Ukraine, respectively. In  
37 each of the countries, except for the 3 Baltic countries and Belarus, a majority of the products were imported from  
38 Russia and Ukraine.  
39  
40  
41  
42  
43  
44  
45  
46  
47  
48  
49  
50  
51  
52  
53

54  
55 The analysis of shelf life was only conducted for packages produced in Russia and Ukraine, as they were the  
56 main exporters to most of the other countries, and in many of the products, especially from Russia, the length of  
57 the shelf life in months or days appeared on the package together with the date of production. This is in contrast to  
58  
59  
60

1  
2  
3  
4 pre-packaged biscuits/cakes/wafers produced in most countries in the more western part of Europe. These  
5  
6 packages only have the best before date and the shelf life of the product is usually hidden for the final customer.  
7  
8 Products with less than 2% TF in the fat had shelf lives of approximately 200 days, comparable to products with a  
9  
10 much higher concentration of TF (table 2). The most frequent length of shelf life was 6 months, whether the  
11  
12 products were produced in Russia or in Ukraine. The slope of the regression line between shelf life and % TF of  
13  
14 total fat was significantly negative for Ukraine ( $p<0.0001$ ) and significantly positive for Russia ( $p<0.0001$ ). Taken  
15  
16 together, the data did not support the conclusion that the higher the TF in the product, the longer the shelf life.  
17  
18

19 Since the samples of biscuits/cakes/wafers were collected between January 2015 and January 2017, and many  
20  
21 were produced in Russia and in Ukraine, the % TF of total fat in the product was depicted in relation to the date of  
22  
23 production. The TF concentrations decrease significantly during the 2 years in Russia ( $p<0.0001$ ) as well as in  
24  
25 Ukraine ( $p<0.0001$ ), but the decrease did not differ significantly between the two countries ( $p=0.12$ ) (figure 4).  
26  
27 The products from Ukraine had a higher TF % in the start of the period than the products from Russia. Based on  
28  
29 the slopes of the regression lines in figure 4, the decline for products from Ukraine was 12.4 % points and for  
30  
31 products from Russia 8.4 % points during the 2 years period.  
32  
33  
34  
35  
36

## 37 **DISCUSSION**

### 38 **The principal findings**

39  
40  
41 The findings of this study clearly demonstrate that in 2015-2016 I-TF was present in high concentrations i.e. more  
42  
43 than 5 % I-TF in the total fat in many different brands of biscuits/cakes/wafers in the countries of the former  
44  
45 Soviet Union, except for the 3 Baltic countries. This information was not previously available and may be of  
46  
47 relevance because of the high coronary mortality in these countries. In 3 of the countries- Russia, Ukraine and  
48  
49 Belarus, by far most of the products are produced in the country itself. For the other countries, except for the 3  
50  
51 Baltic countries, imports from food producers in Russia and Ukraine make up a major part of their products with  
52  
53 high amounts of TF.  
54  
55

56 In all of the shops there were more different packages containing biscuits/cakes/wafers that did not have the  
57  
58 inclusion terms on the label than packages that had one or more of the terms on the label. This suggests that there  
59  
60



1  
2  
3  
4 are plenty of biscuits/cakes/wafers without I-TF available in all of the 45 supermarkets. Of the 1332 packages that  
5 fulfilled the inclusion criteria and were bought, 335 (25%) of the products had less than 2% of the fat as TF. This  
6 suggests that the inclusion criteria are rather broad in relation to the presence of TF and/or that the terms on the  
7 list of ingredients do not always reflect the composition of the fat in the product. If the list of ingredients does not  
8 have the inclusion words the product may still have high amounts of TF and are not bought and analysed for TF.  
9

10  
11  
12  
13  
14  
15 The amounts of TF per 100 grams of product bought in Moscow did not exceed 6 grams (figure 1), whereas  
16 several products produced in Russia, but obtained in the other countries had more than 6 grams per 100 grams, for  
17 instance in Uzbekistan and Kazakhstan (figure 3). The same is seen for the average concentration of I-TF in  
18 products obtained in Russia, with mean value and SD of 10(6) %, compared with considerable higher values in  
19 Russian products obtained in the other countries (table 1). The same pattern is seen for products bought in  
20 Ukraine, compared with products produced in Ukraine but obtained in some of the other countries (table 1). The  
21 products obtained in Russia were bought more than a year later than the products produced in Russia but obtained  
22 in the other countries. This was also the case for the products obtained in Ukraine and outside Ukraine. Some of  
23 the difference may be due to a decrease in the use of I-TF during the time period.(figure 4)  
24  
25  
26  
27  
28  
29  
30  
31  
32

33  
34 I-TF has been used in foods such as biscuits/cakes/wafers also because it apparently prolongs the shelf life of the  
35 foods. This is presently not supported by the findings that 186 products produced in Russia with a shelf life of 6  
36 months had TF concentrations of 11 (7)% mean value (SD) and 37 products with a shelf life of 12 months, also  
37 had TF concentrations of 11 (7)%. The corresponding values from products produced in Ukraine were for 86  
38 products with shelf life of 6 months 20 (9) % and for 30 products with shelf life of 12 months 10 (6) %.  
39  
40  
41  
42  
43  
44

45 Based on the plasma concentrations of TF in nationally representative groups in 2010 in the USA (3 years after  
46 the introduction of mandatory labelling of TF on pre-packaged foods and in spite of a nearly 50 % lower average  
47 TF-concentration in plasma), there is still a subgroup with very high TF concentrations, reflecting a subgroup in  
48 the general population with a high consumption of TF.<sup>4</sup> A vicious cycle apparently occurs: as long as foods with  
49 high amounts of I-TF are present in the shops, some consumers will buy them, and as long as they are bought, the  
50 foods will be available. This may also be the case in the countries of the former Soviet Union. Despite a decline in  
51 the average intake of I-TF in many countries in Western Europe,<sup>16</sup> in 2015 the WHO estimated that millions of  
52  
53  
54  
55  
56  
57  
58  
59  
60

1  
2  
3  
4 Europeans still consume TF at levels that significantly increase their risk for CHD.<sup>23</sup> The findings reported in the  
5 present investigation confirm this estimate.  
6  
7  
8  
9  
10

### 11 **Strength and weaknesses of the study**

12  
13  
14  
15 Strengths of this study include that the same procedure was used to obtain popular foods in large supermarkets in  
16 all 15 countries of the former Soviet Union, and in the 3 largest countries in two different regions and that the  
17 samples were analysed for TF in the same laboratory. A limitation of this study is that no other food groups (such  
18 as shortenings and margarines) and no un-packaged foods (such as baked goods, sweet rolls, pastries, buns and  
19 even un-packaged biscuits/cakes/wafers) were investigated. It is also assumed that if the inclusion words are not  
20 present in the list of ingredients, the product contains less than 2% of the total fat as TF. The presence of high  
21 concentrations of I-TF in biscuits/cakes/wafers may be a sign that I-TF is used in other foods as well. Another  
22 limitation is that the average daily intake of I-TF was not measured in any subgroups of the populations, but  
23 instead was inferred from the availability of popular foods with high amounts of I-TF in large supermarkets. The  
24 competition for shelf space in supermarkets is usually fierce. If products do not sell, they are rapidly replaced by  
25 other products. A relevant subgroup for intake studies would be the consumers who buy pre-packaged  
26 biscuits/cakes/wafers.  
27  
28  
29  
30  
31  
32  
33  
34  
35  
36  
37  
38  
39  
40  
41  
42

### 43 **Legislation and industrially produced *trans* fat in foods**

44  
45 In the USA in 2015, the FDA revoked the previous GRAS (Generally Recognized As Safe) status of partially  
46 hydrogenated oils - a step that may remove I-TF from food production in the USA before July 2018, and Canada  
47 is following suit.<sup>24</sup> In 2009, Austria and Switzerland introduced a legislative ban similar to the Danish ban from  
48 2004, followed by Iceland in 2011, Hungary and Norway in 2014, and initiated by Latvia, Georgia, Lithuania,  
49 Slovenia and other Eastern European countries including Russia between 2016 and 2018.<sup>13,25,26,27</sup> The samples  
50 for the present study were all collected in the various capitals in 2015 or 2016 (supplementary table A) before any  
51 of the legislative restrictions of I-TF in food were fully implemented in these countries. However, some of their  
52  
53  
54  
55  
56  
57  
58  
59  
60

1  
2  
3  
4 food producers were most likely aware of future legislation. They may have commenced a gradual removal of I-  
5 TF from some of their products already in 2015 and 2016. This may be the explanation for the relatively few  
6 products with TF in Lithuania and in Latvia. The explanation is apparently not valid for Estonia that only had 8  
7 products with more than 2 % of the fat as TF and has no internationally published plan for a legislation like the  
8 two other Baltic countries. (figure 1 and table 1)  
9

10  
11  
12  
13  
14  
15 The European Union published a report in 2015, originally commissioned in 2011, that “indicates the need to  
16 continue and expedite work in this area by collecting more information”.<sup>28,29</sup> In the WHO-Europe investigation of  
17 the various ways to reduce I-TF in foods, it was concluded that establishing a legal limit for the content of I-TF in  
18 foods is potentially the only available option that reduces the risks associated with I-TF faced by all consumers  
19 and doing so may contribute to reducing inequalities. Such a policy is unique in its combination of efficacy, cost-  
20 effectiveness and low potential for negative impact. Removing I-TF from the food supply is possibly one of the  
21 most straightforward public health interventions for reducing risk of CHD.<sup>23</sup> The trend over time of using fat  
22 with lower amounts of I-TF (figure 4) will probably accelerate in 2018 among food factories in Russia due to the  
23 Russian legislation <sup>27</sup> and among factories in Ukraine due to competition with Russian factories. The intake of I-  
24 TF in the two large countries may decrease, but in addition also the intake of I-TF among millions of inhabitants  
25 in the adjacent countries due to the large export of biscuits/cakes/wafers from Russia and Ukraine to these  
26 countries.<sup>18</sup> (table 1)  
27  
28  
29  
30  
31  
32  
33  
34  
35  
36  
37  
38  
39  
40  
41  
42

### 43 **Future research and implications for policy makers**

44  
45  
46 It is of considerable interest whether coronary mortality and admission rates for CHD and stroke will change in  
47 countries that have recently introduced legislation that restricts the use of I-TF or intend to do so in the near  
48 future, in the same way as it was observed in Denmark and in certain counties in New York State.<sup>7,8,9</sup>  
49

50  
51  
52 On the basis of data from 2009 to 2011, there is a fivefold difference in age-standardized mortality rates of CHD  
53 between some countries in Western Europe and countries in Central and Eastern Europe, with Central Asia having  
54 the highest rates.<sup>10</sup> Central Eastern Europe and Central Asia were the world regions with the highest current age-  
55 standardized cardiovascular mortality rates, which are more than twice those of Latin America and the  
56  
57  
58  
59  
60

1  
2  
3  
4 Caribbean.<sup>30</sup> These differences cannot be explained only by differences between the countries in the intake of I-  
5 TF. The present study demonstrates a presence of I-TF in popular foods in the countries of the former Soviet  
6 Union with excessively high CHD mortality. Restriction of the use of I-TF in foods, either voluntarily by food  
7 producers or more efficiently by legislation, may be an easily implemented first strategy for some reduction of  
8 cardiovascular diseases in these countries.  
9  
10  
11  
12  
13  
14  
15  
16  
17

## 18 REFERENCES

- 19  
20  
21 1. Gebauer SK, Destailats F, Dionisi F, *et al*. Vaccenic acid and trans fatty acid isomers from partially  
22 hydrogenated oil both adversely affect LDL cholesterol: a double-blind, randomized controlled trial. *Am J*  
23 *Clin Nutr* 2015;102(6):1339-46.  
24  
25  
26  
27
- 28 2. de Souza RJ, Mente A, Maroleanu A, *et al*. Intake of saturated and trans unsaturated fatty acids and risk of  
29 all cause mortality, cardiovascular disease, and type 2 diabetes: systematic review and meta-analysis of  
30 observational studies. *BMJ* 2015;351: h3978. doi:10.1136/bmj.h3978.  
31  
32  
33  
34
- 35 3. Li H, Zhang Q, Song J, *et al*. Plasma trans-fatty acids levels and mortality: a cohort study based on 1999-  
36 2000 National Health and Nutrition Examination Survey (NHANES). *Lipids Health Dis* 2017; 16:  
37 176.doi:10.1186/s12944-017-0567-6.  
38  
39  
40  
41
- 42 4. Yang Q, Zhang Z, Loustalot F, *et al*. Plasma *trans*-Fatty Acid Concentrations Continue to Be Associated  
43 with Serum Lipid and Lipoprotein Concentrations among US Adults after Reductions in *trans*-Fatty Acid  
44 Intake. *J Nutr* 2017;147:896–07.  
45  
46  
47
- 48 5. Hirata Y, Takahashi M, Kudoh Y, *et al*. Trans-Fatty acids promote proinflammatory signaling and cell  
49 death by stimulating the apoptosis signal-regulating kinase 1 (ASK1)-p38 pathway. *J Biol Chem*. 2017;  
50 292: 8174–85 doi: 10.1074/jbc.M116.771519.  
51  
52  
53  
54
- 55 6. Brouwer IA, Wanders AJ, Katan MB. *Trans* fatty acids and cardiovascular health: research completed?  
56 *Eur J Clin Nutr* 2013;67:541–47.  
57  
58  
59  
60

15

- 1
- 2
- 3
- 4 7. Restrepo BJ, Rieger M. Denmark's Policy on Artificial Trans Fat and Cardiovascular Disease. *Am J Prev*
- 5 *Med* 2016;50:69–76.
- 6
- 7
- 8
- 9 8. Restrepo BJ, Rieger M. Trans fat and cardiovascular disease mortality: Evidence from bans in restaurants
- 10 in New York. *J. Health Econ* 2016;45:176–196.
- 11
- 12
- 13
- 14 9. Brandt EJ, Myerson R, Perrailon MC, *et al.* Hospital Admissions for Myocardial Infarction and Stroke
- 15 Before and After the Trans-Fatty Acid Restrictions in New York. *JAMA Cardiol* 2017;2:627–634.
- 16
- 17
- 18
- 19 10. Nichols M, Townsend N, Scarborough P, *et al.* Cardiovascular disease in Europe 2014: epidemiological
- 20 update. *Eur Heart J* 2014;35:2950–59.
- 21
- 22
- 23
- 24 11. Micha R, Khatibzadeh S, Shi P, *et al.* Global, regional, and national consumption levels of dietary fats and
- 25 oils in 1990 and 2010: a systematic analysis including 266 country-specific nutrition surveys. *BMJ* 2014;
- 26 348:g2272 doi:10.1136/bmj.g2272.
- 27
- 28
- 29
- 30 12. Perova NV, Metel'skaia VA, Boytsov SA. [Trans isomers of unsaturated fatty acids increase the risk of
- 31 atherosclerosis-related circulatory system diseases].[Article in Russian]. *Ter Arkh* 2013;85:113-7.
- 32
- 33
- 34
- 35 13. Boytsov SA, Perova NV. To lower trans fatty acid intake as an important condition for the reduction of
- 36 cardiovascular Mortality (Article). *Profilakticheskaya Meditsina* 2017;20:4-9.
- 37
- 38
- 39
- 40 14. Meremäe K, Roasto M, Kuusik S, *et al.* Trans Fatty Acid Contents in Selected Dietary Fats in the Estonian
- 41 Market. *J Food Sci.* 2012;77:163-8.
- 42
- 43
- 44
- 45 15. FEEDcities project. The food environment description in cities in Eastern Europe and Central Asia -
- 46 Tajikistan and Kyrgyzstan. Technical report, WHO Europe, June 2017 and August 2017
- 47 [http://www.euro.who.int/\\_data/assets/pdf\\_file/0012/353001/FEED-TJK-report.pdf?ua=1](http://www.euro.who.int/_data/assets/pdf_file/0012/353001/FEED-TJK-report.pdf?ua=1)
- 48
- 49 [http://www.euro.who.int/\\_data/assets/pdf\\_file/0006/351996/FEED-KGZ-report-web-new.pdf?ua=1](http://www.euro.who.int/_data/assets/pdf_file/0006/351996/FEED-KGZ-report-web-new.pdf?ua=1)
- 50
- 51
- 52 (Accessed Nov 2018).
- 53
- 54
- 55
- 56 16. Wanders AJ, Zock PL, Brouwer IA. Trans Fat Intake and Its Dietary Sources in General Populations
- 57 Worldwide: A Systematic Review. *Nutrients.* 2017;9:840; doi:10.3390/nu9080840.
- 58
- 59
- 60

- 1  
2  
3  
4 17. Stender S, Astrup A, Dyerberg J. A trans European Union difference in the decline in trans fatty acids in  
5 popular foods: a market basket investigation. *BMJ Open* 2012;17:2 e000859. doi: 10.1136/bmjopen-  
6 2012-000859.  
7  
8
- 9  
10 18. [https://en.wikipedia.org/wiki/Post-Soviet\\_states#General\\_statistics](https://en.wikipedia.org/wiki/Post-Soviet_states#General_statistics) (Accessed Nov 2018).  
11  
12
- 13 19. Kravic SZ, Suturovic ZJ, Svarc-Gajic JV, *et al.* Fatty acid composition including *trans*-isomers of Serbian  
14 biscuits. *Hem Ind* 2011;65:139–46.  
15  
16
- 17  
18 20. Stender S, Astrup A, Dyerberg J. Tracing artificial *trans* fat in popular foods in Europe: a market basket  
19 investigation. *BMJ Open* 2014;4: e005218.  
20  
21
- 22  
23 21. Stender S, Astrup A, Dyerberg J. Artificial trans fat in popular foods in 2012 and in 2014: a market  
24 basket investigation in six European countries. *BMJ Open* 2016;6: e010673.  
25  
26
- 27  
28 22. [https://da.wikipedia.org/wiki/International\\_Article\\_Number\\_\(EAN\)](https://da.wikipedia.org/wiki/International_Article_Number_(EAN)) (Accessed Sep 2018).  
29  
30
- 31 23. Eliminating trans fats in Europe – A policy brief ( 2015) [http://www.euro.who.int/en/health-](http://www.euro.who.int/en/health-topics/disease-prevention/nutrition/publications/2015/eliminating-trans-fats-in-europe-a-policy-brief-2015)  
32 [topics/disease-prevention/nutrition/publications/2015/eliminating-trans-fats-in-europe-a-policy-brief-](http://www.euro.who.int/en/health-topics/disease-prevention/nutrition/publications/2015/eliminating-trans-fats-in-europe-a-policy-brief-2015)  
33 [2015](http://www.euro.who.int/en/health-topics/disease-prevention/nutrition/publications/2015/eliminating-trans-fats-in-europe-a-policy-brief-2015) (Accessed Nov 2018).  
34  
35
- 36  
37 24. FDA Cuts Trans Fat in Processed Foods [https://experiencelife.com/article/u-s-trans-fat-ban-](https://experiencelife.com/article/u-s-trans-fat-ban-goes-into-effect/)  
38 [goes-into-effect/](https://experiencelife.com/article/u-s-trans-fat-ban-goes-into-effect/) (Accessed Nov 2018)  
39  
40
- 41  
42 25. Vučić V, Arsić A, Petrović S, *et al.* Trans fatty acid content in Serbian margarines: Urgent need for  
43 legislative changes and consumer information. *Food Chem* 2015;185:437–40.  
44  
45
- 46  
47 26. Wilczek MM, Olszewski R, Krupienicz A. *Trans*-Fatty Acids and Cardiovascular Disease: Urgent Need  
48 for Legislation. *Cardiology*. 2017;138:254–58.  
49  
50
- 51  
52 27. Trans fat legislation in Republic of Russia  
53 [http://rospotrebnadzor.ru/about/info/news/news\\_details.php?ELEMENT\\_ID=9510&sphrase\\_id=148782](http://rospotrebnadzor.ru/about/info/news/news_details.php?ELEMENT_ID=9510&sphrase_id=148782)  
54 [7](http://rospotrebnadzor.ru/about/info/news/news_details.php?ELEMENT_ID=9510&sphrase_id=148782) (accessed Nov 2018)  
55  
56  
57  
58  
59  
60

- 1  
2  
3  
4  
5  
6  
7 28. Report from the Commission to the European parliament and the Council regarding trans fats in foods  
8 and in the overall diet of the Union population. (03-12-2015) [http://ec.europa.eu/dgs/health\\_food-](http://ec.europa.eu/dgs/health_food-safety/dyna/enews/enews.cfm?al_id=1650)  
9 [safety/dyna/enews/enews.cfm?al\\_id=1650](http://ec.europa.eu/dgs/health_food-safety/dyna/enews/enews.cfm?al_id=1650) (Accessed Nov 2018).  
10  
11  
12  
13  
14 29. [https://ec.europa.eu/info/consultations/open-public-consultation-initiative-limit-industrial-trans-fats-](https://ec.europa.eu/info/consultations/open-public-consultation-initiative-limit-industrial-trans-fats-intakes-eu_en)  
15 [intakes-eu\\_en](https://ec.europa.eu/info/consultations/open-public-consultation-initiative-limit-industrial-trans-fats-intakes-eu_en) (accessed Nov 2018)  
16  
17  
18 [http://ec.europa.eu/smart-regulation/roadmaps/docs/2016\\_sante\\_143\\_trans\\_fats\\_en.pdf](http://ec.europa.eu/smart-regulation/roadmaps/docs/2016_sante_143_trans_fats_en.pdf) (Accessed Nov  
19 2018).  
20  
21  
22  
23 30 Barquera S, Pedroza-Tobías A, Medina C, *et al.* Global Overview of the Epidemiology of Atherosclerotic  
24 Cardiovascular Disease. *Arch Med Res* 2015;46:328–38  
25  
26  
27  
28  
29  
30

## 31 LEGENDS

### 32 Figure 1

33  
34  
35  
36  
37 Amounts of industrially produced *trans* fat (I-TF) in 100 grams of pre-packaged biscuits/cakes/wafers purchased  
38 in 2015-2016 in three supermarkets in each of the 15 capitals. Each bar in a panel represents a unique product  
39 bought in that capital, i.e., none of the products in a given panel had the same barcode number. N is the number of  
40 different products with more than 2 % TF of the total fat content. (N) is the number of packages that fulfilled the  
41 inclusion criteria. X is the mean value and the standard deviation of the percentages of I-TF in the total fat of the  
42 N products, M is the maximal value of I-TF as percent of total fat. Each bar in all of the 15 panels has the same  
43 thickness, which means that the area of the bars is comparable between the different panels.  
44  
45  
46  
47  
48  
49  
50

### 51 Figure 2

52  
53  
54 The legend for this figure is similar to the legend for Figure 1. The 4 upper panels show the result for 2 of the  
55 capitals and for 2 other large cities in the same country. The lowest 2 panels give the results from the purchase in  
56 3 large supermarkets in Kiev (Kiev-1) and in 3 other large supermarkets in the same city (Kiev-2).  
57  
58  
59  
60

18

**Figure 3**

Amounts of industrially produced *trans* fat (I-TF) in 100 grams of pre-packaged biscuits/cakes/wafers, obtained in Uzbekistan and in Kazakhstan respectively with each product in the panel placed together with other products from the same country of origin.

**Figure 4**

Date of production and I-TF as percent of total fat for pre-packaged biscuits/cakes/wafers, produced in Russia or Ukraine, respectively, and obtained in the countries of the former Soviet Union between January 2015 and January 2017. Products obtained in Samarkand, Sct Petersburg and Kiev 2 were included if the products had their own *trans* fat analysis. Only products with more than 2% of the fat as I-TF were included.

**Table 1**

Country of origin for pre-packaged biscuits/cakes/wafers with more than 2% of the fat as I-TF obtained in the 15 countries of the former Soviet Union.

**Table 2**

Shelf life of pre-packaged biscuits/cakes/wafers produced in Russia or in Ukraine and obtained in the countries of the former Soviet Union between January 2015 and January 2017.

**Contributors:**

SS was responsible for the concept design of the study, for collection of food items, registration, and labelling, and writing the manuscript. SS is the manuscripts guarantor.



1  
2  
3  
4 **Funding:** This work was supported by Jenny Vissings Foundation, University of Copenhagen and Department of  
5  
6 Clinical Biochemistry, Copenhagen University Hospital, Gentofte, Denmark.  
7

8  
9 **Role of the funding source**  
10

11  
12 The sponsors of the study had no role in the study design, data collection, analysis, and interpretation, the writing  
13  
14 of the report, or the decision to submit the article for publication. The corresponding author had full access to all  
15  
16 the data for the study and had final responsibility for the decision to submit the manuscript for publication.  
17

18  
19 **Competing interests:**  
20

21  
22 None declared  
23

24  
25 **Ethics approval**  
26

27  
28 The study does not require an approval from the Ethics committee  
29

30  
31 **Acknowledgements:**  
32

33  
34 The authors acknowledge the support from Jenny Vissings Foundation, University of Copenhagen and the  
35  
36 Department of Clinical Biochemistry, Copenhagen University Hospital, Gentofte, Denmark.  
37

38  
39 **Copyright statement:**  
40

41  
42 The Corresponding Author has the right to grant an exclusive licence on a worldwide basis to the BMJ Publishing  
43  
44 Group LID Publishers and its licensees in perpetuity, in all forms, formats and media (whether known now or  
45  
46 created in the future), to i) publish, reproduce, distribute, display and store the Contribution, ii) translate the  
47  
48 Contribution into other languages, create adaptations, reprints, include within collections and create summaries,  
49  
50 extracts and/or, abstracts of the Contribution, iii) create any other derivative work(s) based on the Contribution,  
51  
52 iv) to exploit all subsidiary rights in the Contribution, v) the inclusion of electronic links from the Contribution to  
53  
54 third party material where-ever it may be located; and, vi) licence any third party to do any or all of the above.”  
55

56  
57 **Transparency declaration:**  
58  
59  
60

20

1  
2  
3  
4 Steen Stender (the manuscript's guarantor) affirms that the manuscript is an honest, accurate, and transparent  
5  
6 account of the study being reported; that no important aspects of the study have been omitted; and that any  
7  
8 discrepancies from the study as planned (and, if relevant, registered) have been explained.  
9

10  
11 **Data sharing statement:**  
12

13  
14 The data used to construct figures 1-4, tables 1 and 2, and supplementary table A and B can be shared by e-  
15  
16 mailing Steen Stender  
17  
18  
19  
20  
21  
22 -----  
23  
24  
25  
26  
27  
28  
29  
30  
31  
32  
33  
34  
35  
36  
37  
38  
39  
40  
41  
42  
43  
44  
45  
46  
47  
48  
49  
50  
51  
52  
53  
54  
55  
56  
57  
58  
59  
60

**Table 1.** Country of origin for pre-packaged biscuits/cakes/wafers with more than 2% of the fat as *trans* fat obtained in the various countries.

| Country               | Capital               | All*                           |            | Produced in Russia         |             |            |             | Produced in Ukraine        |           |             |             | Produced in own country    |          |          |            | Produced in other countries |            |          |          |             |            |             |
|-----------------------|-----------------------|--------------------------------|------------|----------------------------|-------------|------------|-------------|----------------------------|-----------|-------------|-------------|----------------------------|----------|----------|------------|-----------------------------|------------|----------|----------|-------------|------------|-------------|
|                       |                       | Trans fat per 100 gram fat ≥2% |            | Trans fat per 100 gram fat |             |            |             | Trans fat per 100 gram fat |           |             |             | Trans fat per 100 gram fat |          |          |            | Trans fat per 100 gram fat  |            |          |          |             |            |             |
|                       |                       | N                              | N          | %**                        | Mean        | SD         | Max         | N                          | %**       | Mean        | SD          | Max                        | N        | %**      | Mean       | SD                          | Max        | N        | %**      | Mean        | SD         | Max         |
| Armenia               | Yerevan               | 91                             | 50         | 55                         | 17.6        | 8.8        | 50.8        | 33                         | 36        | 25.5        | 13.8        | 50.0                       | 7        | 8        | 20.0       | 8.0                         | 29.6       | 1        | 1        | 10.2        |            | 10.2        |
| Belarus               | Minsk                 | 98                             | 20         | 20                         | 14.8        | 8.5        | 35.5        | 5                          | 5         | 22.5        | 5.6         | 32.0                       | 71       | 72       | 17.4       | 8.9                         | 39.9       | 2        | 2        | 6.8         | 5.4        | 10.6        |
| Tadjikistan           | Dushanbee             | 136                            | 121        | 89                         | 10.9        | 7.0        | 33.4        | 10                         | 7         | 15.0        | 7.7         | 32.9                       | 4        | 3        | 9.1        | 1.7                         | 10.3       | 1        | 1        | 2.7         |            | 2.7         |
| Kirgistan             | Bishkek               | 81                             | 58         | 72                         | 14.9        | 8.3        | 30.3        | 15                         | 19        | 28.6        | 12.9        | 49.7                       | 4        | 5        | 7.0        | 4.1                         | 12.2       | 4        | 5        | 2.8         | 0.6        | 3.6         |
| Azerbaijan            | Baku                  | 85                             | 58         | 68                         | 12.3        | 7.3        | 34.6        | 15                         | 18        | 12.9        | 1.3         | 33.4                       | 1        | 1        | 3.1        |                             | 3.1        | 11       | 13       | 12.5        | 5.5        | 21.6        |
| Moldova               | Chisinau              | 53                             | 10         | 19                         | 24.6        | 7.8        | 35.2        | 25                         | 47        | 25.8        | 8.0         | 41.5                       | 12       | 23       | 10.1       | 5.9                         | 22.2       | 6        | 11       | 12.0        | 11.3       | 32.1        |
| Ukraine               | Kiev-1                | 83                             | 0          | 0                          |             |            |             | 81                         | 98        | 13.8        | 9.7         | 41.6                       |          |          |            |                             |            | 2        | 2        | 4.2         | 1.0        | 4.9         |
| <i>Ukraine ***</i>    | <i>Kiev-2</i>         | <i>64</i>                      | <i>0</i>   | <i>0</i>                   |             |            |             | <i>62</i>                  | <i>97</i> | <i>14.3</i> | <i>11.0</i> | <i>45.4</i>                |          |          |            |                             |            | <i>2</i> | <i>3</i> | <i>12.1</i> | <i>0.5</i> | <i>12.4</i> |
| Uzbekistan            | Taskent               | 77                             | 50         | 65                         | 10.3        | 7.5        | 35.2        | 20                         | 26        | 16.2        | 9.6         | 33.4                       | 6        | 8        | 11.2       | 4.6                         | 16.2       | 1        | 1        | 6.7         |            | 6.7         |
| <i>Uzbekistan ***</i> | <i>Samarkand</i>      | <i>63</i>                      | <i>30</i>  | <i>48</i>                  | <i>13.5</i> | <i>7.7</i> | <i>29.0</i> | <i>28</i>                  | <i>44</i> | <i>18.7</i> | <i>11.8</i> | <i>42.7</i>                | <i>5</i> | <i>8</i> | <i>4.1</i> | <i>2.5</i>                  | <i>8.4</i> | <i>0</i> | <i>0</i> |             |            |             |
| Turkmenistan          | Ashgabat              | 54                             | 18         | 33                         | 13.3        | 8.0        | 28.9        | 24                         | 44        | 18.4        | 10.6        | 38.0                       | 0        | 0        |            |                             |            | 12       | 22       | 12.6        | 7.3        | 26.2        |
| Georgia               | Tblisi                | 47                             | 23         | 49                         | 15.7        | 9.7        | 36.1        | 8                          | 17        | 21.3        | 9.3         | 34.6                       | 7        | 15       | 23.3       | 9.9                         | 33.3       | 9        | 19       | 7.5         | 4.8        | 16.4        |
| Russia                | Moscow                | 75                             | 75         | 100                        | 9.5         | 5.6        | 27.0        | 0                          | 0         |             |             |                            |          |          |            |                             |            | 0        | 0        |             |            |             |
| <i>Russia ***</i>     | <i>Sct Petersburg</i> | <i>105</i>                     | <i>105</i> | <i>100</i>                 | <i>9.3</i>  | <i>5.0</i> | <i>27.0</i> | <i>0</i>                   | <i>0</i>  |             |             |                            |          |          |            |                             |            | <i>0</i> | <i>0</i> |             |            |             |
| Kazakhstan            | Astana                | 50                             | 28         | 56                         | 11.3        | 7.6        | 29.1        | 12                         | 24        | 10.9        | 5.6         | 19.3                       | 7        | 14       | 12.0       | 8.7                         | 28.7       | 3        | 6        | 11.8        | 7.6        | 20.5        |
| Lithuania             | Vilnius               | 32                             | 0          | 0                          |             |            |             | 9                          | 28        | 10.5        | 8.3         | 32.5                       | 9        | 28       | 8.4        | 4.6                         | 15.7       | 14       | 44       | 6.7         | 3.8        | 14.0        |
| Latvia                | Riga                  | 24                             | 5          | 21                         | 9.0         | 3.8        | 12.2        | 4                          | 17        | 8.9         | 3.8         | 14.5                       | 5        | 21       | 5.5        | 4.1                         | 11.3       | 10       | 42       | 6.7         | 3.2        | 11.0        |
| Estonia               | Tallinn               | 8                              | 1          | 13                         | 29.2        |            | 29.2        | 2                          | 25        | 19.3        | 17.0        | 31.3                       | 0        | 0        |            |                             |            | 5        | 63       | 8.0         | 3.6        | 11.3        |
| 15 countries together |                       | 994                            | 517        |                            |             |            |             | 263                        |           |             |             |                            | 133      |          |            |                             |            | 81       |          |             |            |             |

All\* is the number in each country of different packages of biscuits/cakes/wafers with ≥ 2% trans fat per 100 gram fat  
 %\*\* is the number of samples with more than 2% of the fat as trans fat as percent of all samples obtained in that country with more than 2% of the fat as trans fat  
 \*\*\* the lines in italic present values for biscuits/cakes/wafers obtained by the same procedure but in extra regions of the same country. The values are not included in the bottom line

22

**Table 2.** Shelf life of pre-packaged biscuits/cakes/wafers produced in Russia and Ukraine

|                              | Produced in Russia |         | Produced in Ukraine |         |
|------------------------------|--------------------|---------|---------------------|---------|
| <b>Trans fat as % of fat</b> | < 2%               | ≥ 2%    | <2%                 | ≥ 2%    |
| <b>Number of samples*</b>    | 140                | 453     | 24                  | 220     |
| <b>Shelf life in days</b>    |                    |         |                     |         |
| Mean (SD)                    | 202(83)            | 219(70) | 286(94)             | 215(85) |
| Range                        | 59-547             | 46-396  | 123-366             | 46-546  |

\* Samples obtained in Samarkand, Sct Petersburg, and Kiev-2 were included if these samples had their own trans fat analysis and a readable shelf life on the package

Figure 1

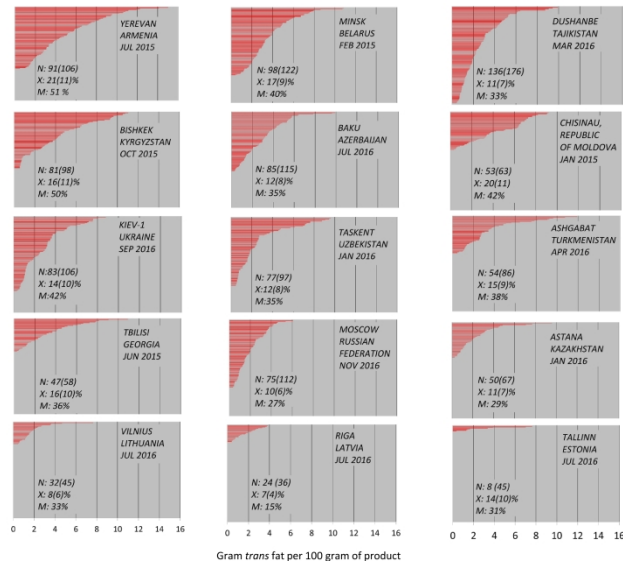

Amounts of industrially produced trans fat (I-TF) in 100 grams of pre-packaged biscuits/cakes/wafers purchased in 2015-2016 in three supermarkets in each of the 15 capitals. Each bar in a panel represents a unique product bought in that capital, i.e., none of the products in a given panel had the same barcode number. N is the number of different products with more than 2 % TF of the total fat content. (N) is the number of packages that fulfilled the inclusion criteria. X is the mean value and the standard deviation of the percentages of I-TF in the total fat of the N products, M is the maximal value of I-TF as percent of total fat. Each bar in all of the 15 panels has the same thickness, which means that the area of the bars is comparable between the different panels.

338x190mm (300 x 300 DPI)

Figure 2

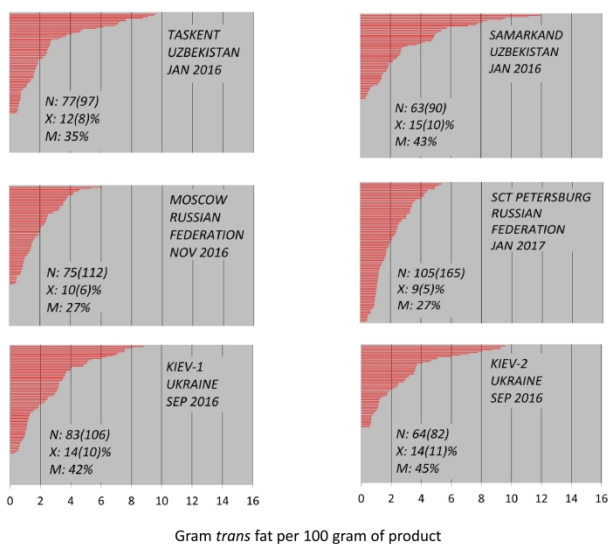

The legend for this figure is similar to the legend for Figure 1. The 4 upper panels show the result for 2 of the capitals and for 2 other large cities in the same country. The lowest 2 panels give the results from the purchase in 3 large supermarkets in Kiev (Kiev-1) and in 3 other large supermarkets in the same city (Kiev-2).

338x190mm (300 x 300 DPI)

1  
2  
3  
4  
5  
6  
7  
8  
9  
10  
11  
12  
13  
14  
15  
16  
17  
18  
19  
20  
21  
22  
23  
24  
25  
26  
27  
28  
29  
30  
31  
32  
33  
34  
35  
36  
37  
38  
39  
40  
41  
42  
43  
44  
45  
46  
47  
48  
49  
50  
51  
52  
53  
54  
55  
56  
57  
58  
59  
60

Figure 3

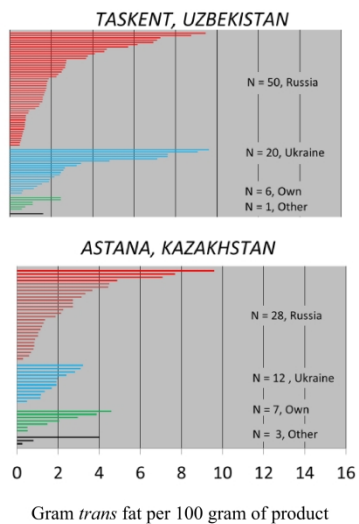

Amounts of industrially produced trans fat (I-TF) in 100 grams of pre-packaged biscuits/cakes/wafers, obtained in Uzbekistan and in Kazakhstan respectively with each product in the panel placed together with other products from the same country of origin.

338x190mm (300 x 300 DPI)

Figure 4



Date of production and I-TF as percent of total fat for pre-packaged biscuits/cakes/wafers, produced in Russia or Ukraine, respectively, and obtained in the countries of the former Soviet Union between January 2015 and January 2017. Products obtained in Samarkand, Sct Petersburg and Kiev 2 were included if the products had their own trans fat analysis. Only products with more than 2% of the fat as I-TF were included.

338x190mm (300 x 300 DPI)



## Supplementary table A

Names and population of the countries of the former Soviet Union and the mortalities of coronary heart disease(CHD) and cardiovascular disease (CVD)

| Country             | Capital  | Visit<br>Month | Visit<br>Year | Capital<br>population<br>millions* | Country<br>population<br>millions* | Year | CHD-mortality<br>male<br>per 100.000 | CVD-mortality<br>male<br>per 100.000 | Year | CHD-mortality<br>female<br>per 100.000 | CVD-mortality<br>female<br>per 100.000 |
|---------------------|----------|----------------|---------------|------------------------------------|------------------------------------|------|--------------------------------------|--------------------------------------|------|----------------------------------------|----------------------------------------|
| Republic of Moldova | Chisinau | Jan            | 2015          | 0.669                              | 3.6                                | 2014 | 528                                  | 790                                  | 2012 | 365                                    | 564                                    |
| Belarus             | Minsk    | Feb            | 2015          | 1.893                              | 9.5                                | 2016 | 642                                  | 893                                  | 2009 | 284                                    | 428                                    |
| Georgia             | Tbilisi  | Jun            | 2015          | 1.173                              | 3.7                                | 2016 | 80                                   | 325                                  | 2010 | 39                                     | 190                                    |
| Armenia             | Yerevan  | Jul            | 2015          | 1.06                               | 3.0                                | 2016 | 352                                  | 525                                  | 2012 | 211                                    | 357                                    |
| Kyrgyzstan          | Bishkek  | Oct            | 2015          | 0.871                              | 5.5                                | 2009 | 534                                  | 842                                  | 2010 | 373                                    | 588                                    |
| Kazakhstan          | Astana   | Jan            | 2016          | 0.639                              | 17.7                               | 2016 | 265                                  | 810                                  | 2010 | 124                                    | 485                                    |
| Uzbekistan          | Taskent  | Jan            | 2016          | 2.31                               | 31.6                               | 2016 | 454                                  | 858                                  | 2005 | 321                                    | 662                                    |
| Tajikistan          | Dushanbe | Mar            | 2016          | 0.779                              | 8.6                                | 2015 | 304                                  | 710                                  | 2004 | 186                                    | 504                                    |
| Turkmenistan        | Ashgabat | Apr            | 2016          | 1.031                              | 6.7                                | 2011 | 563                                  | 1017                                 | 1998 | 333                                    | 717                                    |
| Estonia             | Tallinn  | Feb            | 2016          | 0.444                              | 1.3                                | 2016 | 256                                  | 501                                  | 2012 | 118                                    | 269                                    |
| Latvia              | Riga     | Jul            | 2016          | 0.43                               | 2.0                                | 2014 | 355                                  | 655                                  | 2012 | 174                                    | 353                                    |
| Lithuania           | Vilnius  | Jul            | 2016          | 0.537                              | 2.9                                | 2016 | 436                                  | 667                                  | 2010 | 239                                    | 383                                    |
| Azerbaijan          | Baku     | jul            | 2016          | 2.182                              | 9.8                                | 2016 | 149                                  | 617                                  | 2007 | 93                                     | 489                                    |
| Ukraine             | Kiev     | Sep            | 2016          | 2.847                              | 42.5                               | 2013 | 600                                  | 873                                  | 2012 | 356                                    | 533                                    |
| Russian Federation  | Moscow   | Nov            | 2015          | 13.197                             | 146.7                              | 2016 | 501                                  | 915                                  | 2010 | 255                                    | 517                                    |
| UK                  |          |                |               |                                    |                                    |      | 111                                  | 205                                  | 2010 | 49                                     | 129                                    |
| Denmark             |          |                |               |                                    |                                    |      | 67                                   | 174                                  | 2011 | 33                                     | 111                                    |

\* Values from Wikipedia.<sup>18</sup> Mortalities from <sup>10</sup>

## Supplementary table B:

Number of samples obtained from the various countries and the number and percentages of samples that were analysed for *trans* fat (TF)  
 Samples that were not analysed received their TF values from similar products that already have been analysed.

| Country                              | Capital               | All *samples    |      |            | Samples with<br><i>trans</i> fat per 100 gram fat < 2% |     |           | Samples with<br><i>trans</i> fat per 100 gram fat ≥2% |     |           |
|--------------------------------------|-----------------------|-----------------|------|------------|--------------------------------------------------------|-----|-----------|-------------------------------------------------------|-----|-----------|
|                                      |                       | Analysed for TF |      |            | Analysed for TF                                        |     |           | Analysed for TF                                       |     |           |
|                                      |                       | N-all           | N    | % of N-all | N<2%                                                   | N   | % of N<2% | N≥2%                                                  | N   | % of N≥2% |
| Armenia                              | Yerevan               | 106             | 106  | 100        | 15                                                     | 15  | 100       | 91                                                    | 91  | 100       |
| Belarus                              | Minsk                 | 122             | 122  | 100        | 24                                                     | 24  | 100       | 98                                                    | 98  | 100       |
| Tadjikistan                          | Dushanbee             | 176             | 121  | 69         | 40                                                     | 32  | 80        | 136                                                   | 89  | 65        |
| Kirgistan                            | Bishkek               | 98              | 98   | 100        | 17                                                     | 17  | 100       | 81                                                    | 81  | 100       |
| Azerbaijan                           | Baku                  | 115             | 58   | 50         | 30                                                     | 19  | 63        | 85                                                    | 39  | 46        |
| Moldova                              | Chisinau              | 63              | 63   | 100        | 10                                                     | 10  | 100       | 53                                                    | 53  | 100       |
| Ukraine                              | Kiev-1                | 106             | 84   | 79         | 23                                                     | 19  | 83        | 83                                                    | 65  | 78        |
| <i>Ukraine **</i>                    | <i>Kiev-2</i>         | 82              | 40   | 49         | 18                                                     | 7   | 39        | 64                                                    | 33  | 52        |
| Uzbekistan                           | Taskent               | 97              | 63   | 65         | 20                                                     | 12  | 60        | 77                                                    | 51  | 66        |
| <i>Uzbekistan **</i>                 | <i>Samarkand</i>      | 90              | 31   | 34         | 27                                                     | 10  | 37        | 63                                                    | 21  | 33        |
| Turkmenistan                         | Ashgabat              | 86              | 56   | 65         | 32                                                     | 28  | 88        | 54                                                    | 28  | 52        |
| Georgia                              | Tblisi                | 58              | 58   | 100        | 11                                                     | 11  | 100       | 47                                                    | 47  | 100       |
| Russia                               | Moscow                | 112             | 99   | 88         | 37                                                     | 31  | 84        | 75                                                    | 68  | 91        |
| <i>Russia **</i>                     | <i>Sct Petersburg</i> | 165             | 69   | 42         | 60                                                     | 20  | 33        | 105                                                   | 49  | 47        |
| Kazakhstan                           | Astana                | 67              | 44   | 66         | 17                                                     | 15  | 88        | 50                                                    | 29  | 58        |
| Lithuania                            | Vilnius               | 45              | 34   | 76         | 13                                                     | 11  | 85        | 32                                                    | 23  | 72        |
| Latvia                               | Riga                  | 36              | 27   | 75         | 12                                                     | 12  | 100       | 24                                                    | 15  | 63        |
| Estonia                              | Tallinn               | 45              | 35   | 78         | 37                                                     | 28  | 76        | 8                                                     | 7   | 88        |
| 15 countries and 3 extra regions     |                       | 1669            | 1208 | 72         | 440                                                    | 321 | 73        | 1226                                                  | 887 | 72        |
| 15 countries without 3 extra regions |                       | 1332            | 1068 | 80         | 335                                                    | 284 | 85        | 994                                                   | 784 | 79        |

All\* is the number in each country of different packages of biscuits/cakes/wafers that fulfilled the inclusion criteria

\*\* the lines in italic present values for biscuits/cakes/wafers obtained by the same procedure but in extra regions in the same country

STROBE Statement—Checklist of items that should be included in reports of *cross-sectional studies*

Manuscript ID bmjopen-2018-023184 entitled "Industrially produced trans fat in popular foods in 2015-2016 in 15 countries of the former Soviet Union: a market basket investigation  
12-9-2018

|                              | Item No | Recommendation                                                                                                                                                                                                                                                                                                                                                                                                                                                  |
|------------------------------|---------|-----------------------------------------------------------------------------------------------------------------------------------------------------------------------------------------------------------------------------------------------------------------------------------------------------------------------------------------------------------------------------------------------------------------------------------------------------------------|
| <b>I Title and abstract</b>  | 1       | (a) Indicate the study's design with a commonly used term in the title or the abstract <b>line 5</b><br>(b) Provide in the abstract an informative and balanced summary of what was done and what was found <b>Lines 26-37</b>                                                                                                                                                                                                                                  |
| <b>Introduction</b>          |         |                                                                                                                                                                                                                                                                                                                                                                                                                                                                 |
| Background/rationale         | 2       | Explain the scientific background and rationale for the investigation being reported <b>Lines 68-79</b>                                                                                                                                                                                                                                                                                                                                                         |
| Objectives                   | 3       | State specific objectives, including any prespecified hypotheses <b>Lines 102-103</b>                                                                                                                                                                                                                                                                                                                                                                           |
| <b>Methods</b>               |         |                                                                                                                                                                                                                                                                                                                                                                                                                                                                 |
| Study design                 | 4       | Present key elements of study design early in the paper <b>Lines 107-120</b>                                                                                                                                                                                                                                                                                                                                                                                    |
| Setting                      | 5       | Describe the setting, locations, and relevant dates, including periods of recruitment, exposure, follow-up, and data collection <b>Supplementary table A</b>                                                                                                                                                                                                                                                                                                    |
| Participants                 | 6       | (a) Give the eligibility criteria, and the sources and methods of selection of participants <b>Lines 107-120</b>                                                                                                                                                                                                                                                                                                                                                |
| Variables                    | 7       | Clearly define all outcomes, exposures, predictors, potential confounders, and effect modifiers. Give diagnostic criteria, if applicable <b>Lines 145-166</b>                                                                                                                                                                                                                                                                                                   |
| Data sources/<br>measurement | 8*      | For each variable of interest, give sources of data and details of methods of assessment (measurement). Describe comparability of assessment methods if there is more than one group <b>Lines 145-151</b>                                                                                                                                                                                                                                                       |
| Bias                         | 9       | Describe any efforts to address potential sources of bias <b>Lines 157-166</b>                                                                                                                                                                                                                                                                                                                                                                                  |
| Study size                   | 10      | Explain how the study size was arrived at <b>Lines 22-25</b>                                                                                                                                                                                                                                                                                                                                                                                                    |
| Quantitative variables       | 11      | Explain how quantitative variables were handled in the analyses. If applicable, describe which groupings were chosen and why <b>Line 31</b>                                                                                                                                                                                                                                                                                                                     |
| Statistical methods          | 12      | (a) Describe all statistical methods, including those used to control for confounding <b>Lines 172-174</b><br>(b) Describe any methods used to examine subgroups and interactions <b>NA</b><br>(c) Explain how missing data were addressed <b>Lines 138-144, Supplementary table B</b><br>(d) If applicable, describe analytical methods taking account of sampling strategy <b>Lines 145-151</b><br>(e) Describe any sensitivity analyses <b>Lines 130-135</b> |
| <b>Results</b>               |         |                                                                                                                                                                                                                                                                                                                                                                                                                                                                 |
| Participants                 | 13*     | (a) Report numbers of individuals at each stage of study—eg numbers potentially eligible, examined for eligibility, confirmed eligible, included in the study, completing follow-up, and analysed <b>Table 1</b><br>(b) Give reasons for non-participation at each stage <b>NA</b><br>(c) Consider use of a flow diagram <b>NA</b>                                                                                                                              |
| Descriptive data             | 14*     | (a) Give characteristics of study participants (eg demographic, clinical, social) and information on exposures and potential confounders <b>Lines 107-120</b><br>(b) Indicate number of participants with missing data for each variable of interest                                                                                                                                                                                                            |

**Supplementary table B**

|                          |     |                                                                                                                                                                                                                                                                                                                                                                                                                                                  |
|--------------------------|-----|--------------------------------------------------------------------------------------------------------------------------------------------------------------------------------------------------------------------------------------------------------------------------------------------------------------------------------------------------------------------------------------------------------------------------------------------------|
| Outcome data             | 15* | Report numbers of outcome events or summary measures <b>Figure 1 and Table 1</b>                                                                                                                                                                                                                                                                                                                                                                 |
| Main results             | 16  | (a) Give unadjusted estimates and, if applicable, confounder-adjusted estimates and their precision (eg, 95% confidence interval). Make clear which confounders were adjusted for and why they were included <b>NA</b><br>(b) Report category boundaries when continuous variables were categorized <b>Line 31</b><br>(c) If relevant, consider translating estimates of relative risk into absolute risk for a meaningful time period <b>NA</b> |
| Other analyses           | 17  | Report other analyses done—eg analyses of subgroups and interactions, and sensitivity analyses <b>Lines 212-221</b>                                                                                                                                                                                                                                                                                                                              |
| <b>Discussion</b>        |     |                                                                                                                                                                                                                                                                                                                                                                                                                                                  |
| Key results              | 18  | Summarise key results with reference to study objectives <b>Lines 231-238</b>                                                                                                                                                                                                                                                                                                                                                                    |
| Limitations              | 19  | Discuss limitations of the study, taking into account sources of potential bias or imprecision. Discuss both direction and magnitude of any potential bias <b>Lines 271-282</b>                                                                                                                                                                                                                                                                  |
| Interpretation           | 20  | Give a cautious overall interpretation of results considering objectives, limitations, multiplicity of analyses, results from similar studies, and other relevant evidence <b>Lines 320-322</b>                                                                                                                                                                                                                                                  |
| Generalisability         | 21  | Discuss the generalisability (external validity) of the study results <b>Lines 260-268</b>                                                                                                                                                                                                                                                                                                                                                       |
| <b>Other information</b> |     |                                                                                                                                                                                                                                                                                                                                                                                                                                                  |
| Funding                  | 22  | Give the source of funding and the role of the funders for the present study and, if applicable, for the original study on which the present article is based <b>Lines 434-435</b>                                                                                                                                                                                                                                                               |

\*Give information separately for exposed and unexposed groups.

**Note:** An Explanation and Elaboration article discusses each checklist item and gives methodological background and published examples of transparent reporting. The STROBE checklist is best used in conjunction with this article (freely available on the Web sites of PLoS Medicine at <http://www.plosmedicine.org/>, Annals of Internal Medicine at <http://www.annals.org/>, and Epidemiology at <http://www.epidem.com/>). Information on the STROBE Initiative is available at [www.strobe-statement.org](http://www.strobe-statement.org).

# BMJ Open

## Industrially produced trans fat in popular foods in 15 countries of the former Soviet Union from 2015-2016: a market basket investigation

|                                 |                                                                                                                                                 |
|---------------------------------|-------------------------------------------------------------------------------------------------------------------------------------------------|
| Journal:                        | <i>BMJ Open</i>                                                                                                                                 |
| Manuscript ID                   | bmjopen-2018-023184.R3                                                                                                                          |
| Article Type:                   | Research                                                                                                                                        |
| Date Submitted by the Author:   | 12-Dec-2018                                                                                                                                     |
| Complete List of Authors:       | Stender, Steen; Kobenhavns Universitet Det Natur- og Biovidenskabelige Fakultet, Nutrition Exercise and Sports                                  |
| <b>Primary Subject Heading</b>: | Health policy                                                                                                                                   |
| Secondary Subject Heading:      | Health policy, Global health, Public health                                                                                                     |
| Keywords:                       | Coronary heart disease < CARDIOLOGY, NUTRITION & DIETETICS, Health policy < HEALTH SERVICES ADMINISTRATION & MANAGEMENT, central asia trans fat |
|                                 |                                                                                                                                                 |

SCHOLARONE™  
Manuscripts

1

10-12-2018

1  
2  
3  
4  
5  
6  
7  
8  
9  
10  
11  
12  
13  
14  
15 Industrially produced *trans* fat in popular foods in 15 countries of the former Soviet Union from  
16  
17 2015-2016: a market basket investigation  
18  
19  
20  
21  
22  
23  
24

25 Steen Stender, Professor, MD, DMSci  
26  
27  
28

29 Steen Stender, Department of Nutrition, Exercise and Sports, University of Copenhagen,  
30  
31 Rolighedsvej 26, Frederiksberg, 1958 DK, Denmark  
32  
33  
34  
35

36 Correspondence to: S Stender [stender@nxs.ku.dk](mailto:stender@nxs.ku.dk)  
37  
38

39 Telephone number: +45 35333162  
40  
41

42 Telephone number: +45 40258601  
43  
44  
45  
46  
47

48  
49 Key Words: Coronary heart disease, Health policy, Nutrition, Soviet Union, *Trans* fat  
50  
51  
52  
53  
54  
55  
56  
57  
58  
59  
60

## ABSTRACT

**Objective:** To minimize the intake of industrially produced *trans* fat (I-TF) and thereby decrease the risk of coronary heart disease (CHD), several countries have implemented a legislative restriction on I-TF in foods. The objective of this study was to investigate the presence of I-TF in biscuits/cakes/wafers in 15 countries of the former Soviet Union that all have a high coronary mortality rate compared with countries in Western Europe.

**Methods:** Three large supermarkets in 15 capitals were visited in 2015 or 2016. Pre-packaged biscuits/cakes/wafers were bought if the list of ingredients disclosed that the product contained more than 15 grams of fat per 100 grams of product and if partially hydrogenated fat or a similar term, including margarine, refined fat or confectionary fat, were mentioned. Samples of the foods were subsequently analysed for total fat and TF.

**Results:** Some 994 products contained more than 2% total fat as I-TF (illegal in Denmark). In Armenia, 91 different products had a mean value (SD) of 21(11) % fat as I-TF. In Estonia, there were eight products with 14(10) % fat as I-TF. The other 13 countries had values between those of Armenia and Estonia. In several countries, a major portion of the products was imported from Russia and Ukraine. The mean shelf life (SD) of 673 packages was 218 (75) days. The % TF in the fat of the products produced in Russia and in Ukraine in relation to the date of production both declined by approximately 10 % points during the 2-year collection period.

**Conclusions:** The findings suggest that I-TF is used in popular foods in all 15 countries of the former Soviet Union. Therefore, these findings indicate a possible way for some reduction of the high coronary mortality rate in these countries.

### Strengths and limitations of this study

- A strength of this study is that the presence of industrially produced *trans* fat in popular foods was systematically investigated for the first time in each of the 15 countries of the former Soviet Union that all have a high coronary mortality rate and a population of nearly 300 million people.
- A limitation of the study is that only pre-packaged biscuits/cakes/wafers were investigated for *trans* fat, and no other food groups, such as shortenings and margarines, and no un-packaged foods, such as baked goods, sweet rolls, pastries, buns and even un-packaged biscuits/cakes/wafers, were investigated.
- A limitation is the assumption that if certain words were not present in the list of ingredients, the product contained less than 2% total fat as *trans* fat.
- Another limitation is that the average daily intake of *trans* fat was not measured in any of the subgroups of the populations but instead was inferred from the availability of popular foods with high amounts of *trans* fat in large supermarkets.

### INTRODUCTION

High amounts of *trans* fat (TF) in food i.e., more than 5% TF in total fat, in food originate from the industrial hydrogenation of edible oils. Compared to non-hydrogenated oils, fats containing industrially produced *trans* fat (I-TF) are solid at room temperature, have some technical advantages for food processing, and prolong the shelf life of products. TF are not synthesized in the human body and are not required in the diet but are absorbed and metabolized. I-TF can be found at



1  
2  
3  
4 varying concentrations in biscuits, pastries, margarine, spreads, confectionary creams and fillings  
5  
6 and fried foods such as potato crisps. Fat from ruminants, for instance, in dairy products, contains  
7  
8 up to 5% TF (R-TF), which is considerably lower than the up to 50% TF that may be present in  
9  
10 partially hydrogenated fat in human food. In a double blind, randomized controlled trial in humans,  
11  
12 R-TF and I-TF resulted in the same increase in LDL cholesterol in blood when the two different  
13  
14 R-TF and I-TF resulted in the same increase in LDL cholesterol in blood when the two different  
15  
16 types of fat were provided in the diet at the same amount.<sup>1</sup> This result suggests that R-TF and I-TF  
17  
18 have similar harmful effects on plasma lipoproteins.

19  
20  
21 Observational studies suggest that there is an association between the dietary intake of I-TF and  
22  
23 increased risk of coronary heart disease (CHD).<sup>2</sup> The association is further corroborated by an  
24  
25 association between plasma TF levels and CHD.<sup>3</sup> Plausible mechanisms for the association  
26  
27 involving an increase in plasma LDL cholesterol<sup>4</sup> and unfavourable “beyond lipid effects” on  
28  
29 inflammatory cells that are important for atherogenesis<sup>5</sup> suggest a causal relationship, even with the  
30  
31 absence of randomized studies with hard clinical endpoints.<sup>6</sup> Based on the available evidence,  
32  
33 Denmark in 2004 and some counties in New York, USA, in 2007, legally restricted the use of I-TF  
34  
35 in the diet. After the restrictions in Denmark, there was a 4.3% lower yearly mortality rate due to  
36  
37 CHD beyond temporal trends.<sup>7</sup> A similar decline of 4.5% in the CHD mortality rate was found in  
38  
39 the counties with restrictions in New York compared with that in similar counties without  
40  
41 restrictions.<sup>8</sup> Three and more years after the restrictions were enacted in the counties, the combined  
42  
43 hospital admission rate for myocardial infarction and stroke events was 6.2% lower than that in  
44  
45 similar counties without restrictions.<sup>9</sup> These findings from 2 different groups of researchers strongly  
46  
47 suggest that I-TF in the diet promotes CHD and that a restriction in its use reduces CHD. What  
48  
49 remains to be explored is to what extent I-TF is still used in popular foods in countries with high  
50  
51 rates of CHD mortality.  
52  
53  
54  
55  
56  
57  
58  
59  
60

1  
2  
3  
4 The 15 countries of the former Soviet Union all have an extraordinarily high rate of CHD  
5 mortality compared with that of countries in Western Europe.<sup>10</sup> (supplementary table A) In a  
6 systematic analysis, including 266 country-specific nutrition surveys, the average consumption of  
7 TF in 2010 in Central Asia and Eastern Europe, which together include the 15 countries of the  
8 former Soviet Union, for adults more than 20 years old, was 0.9% of total energy intake.<sup>11</sup> This  
9 intake corresponds to approximately 2.5 grams of TF per day per adult and is less than the 1% of  
10 the total energy recommended by the WHO. The consumption level was found to be stable since  
11 1990. Among the 21 different regions in the world, Central Asia and Eastern Europe were placed at  
12 number 5 and 8, respectively, for the lowest average consumption of TF, suggesting that the intake  
13 of TF is a minor health problem in these countries. However, the investigators mention the  
14 relatively limited availability of data availability on TF consumption in most of these nations  
15 compared with the availability of data on other major dietary factors.<sup>11</sup> Furthermore, a low average  
16 intake of TF in a nation does not exclude a high intake of TF in subgroups of the population if  
17 popular foods contain high amounts of I-TF.  
18  
19  
20  
21  
22  
23  
24  
25  
26  
27  
28  
29  
30  
31  
32  
33  
34  
35

36 Some recent Russian studies, with an abstract in English, mentioned the harmful effect of dietary  
37 I-TF on health and pledged to remove I-TF from margarine “to preserve the health of Russia’s  
38 population”.<sup>12,13</sup> A study from Estonia reported on high I-TF in blended spreads, margarines and  
39 shortenings that were bought in the Estonian retail markets in 2011.<sup>14</sup> Additionally, technical  
40 reports from the WHO have found several types of street foods with high amounts of TF in  
41 Dushanbe, Tajikistan in April/May 2016 and in Bishkek, Kyrgyzstan, in June/July 2016.<sup>15</sup> In a  
42 recent systematic review of TF intake and its dietary sources in general populations worldwide  
43 based on data from 29 different countries and a demonstration of a substantial reduction in I-TF in  
44 many countries, none of the countries of the former Soviet Union were included for either the intake  
45 of the general population or for the secondary research question of the study about the composition  
46  
47  
48  
49  
50  
51  
52  
53  
54  
55  
56  
57  
58  
59  
60

6

1  
2  
3  
4 of fat in biscuits because of the lack of data.<sup>16</sup> Apparently, there is a pronounced scarcity of newer  
5  
6 internationally published data on I-TF in foods in most of these countries. The purpose of the  
7  
8 present study was to investigate the presence of I-TF in popular foods in the 15 countries of the  
9  
10 former Soviet Union via a newly developed market basket method.<sup>17</sup>  
11  
12

## 13 14 **METHODS**

### 15 16 17 **Purchase of biscuits/cakes/wafers in supermarkets**

18  
19  
20 By using Wikipedia and local tourist information offices, three large supermarkets, preferably chain  
21  
22 supermarkets with many large shops across the country, were identified in each capital.<sup>18</sup> Pre-  
23  
24 packaged biscuits/cakes/wafers were chosen as the food to be investigated for TF in this study  
25  
26 because these types of foods are frequently consumed, easily accessible, and transportable at  
27  
28 ambient temperature. Furthermore, these foods traditionally contain I-TF-rich partially  
29  
30 hydrogenated vegetable oils as their major lipid ingredient, and I-TF has previously been found in  
31  
32 these foods in high concentrations in some countries in Eastern Europe.<sup>19–21</sup> The packages of  
33  
34 biscuits/cakes/wafers were obtained in each supermarket by systematically examining the labels of  
35  
36 the products. Packages were purchased if their list of ingredients met the following criteria:  
37  
38  
39

- 40  
41  
42 • The total fat content was equal to or exceeded 15 g per 100 g of product.
- 43  
44  
45 • One or more of the following terms was listed: partially hydrogenated fat, hydrogenated fat,  
46  
47 hardened fat, refined fat, confectionary fat, deodorised fat, all-purpose fat or margarine.
- 48  
49  
50 • If the list of ingredients indicated *trans* fat > 0 g, these foods were also included.
- 51  
52  
53 • Packages with the term ‘unhydrogenated fat,’ ‘fully hydrogenated fat’ or ‘no *trans* fat’ were  
54  
55 not purchased.  
56  
57  
58  
59  
60

1  
2  
3  
4 If the same package with the same barcode number was found in more than one of the three  
5  
6 different supermarkets in the same capital, only the package with the most recent production date  
7  
8 was included in the study. Each package was subsequently labelled with an ID number, and  
9  
10 duplicate samples of approximately 50 grams each of the product were taken for analysis. The  
11  
12 barcode number, the name of the producer, the country of origin and, if available, the best before  
13  
14 date as well as the production date were recorded, and the empty packages were stored. The first 2  
15  
16 digits (sometimes three digits) of the barcode number were used to identify the country or economic  
17  
18 region numbering authority that assigned the manufacturer code. The Russian Federation uses the  
19  
20 code 46; Ukraine, 482. The manufacturer code is the next 5 digits, followed by the product code,  
21  
22 consisting of 5 digits. The last digit is the check digit.<sup>22</sup>  
23  
24  
25  
26  
27

28 To investigate to what extent the presence of biscuits/cakes/wafers in the capital differed from other  
29  
30 parts of the country, biscuits/cakes/wafers were obtained from 3 different supermarkets in 2  
31  
32 different regions of the 2 largest countries Uzbekistan and Russia: in Uzbekistan also in the second  
33  
34 largest city Samarkand (0.4 million inhabitants and approximately 300 km from Taskent) and in  
35  
36 Russia also in St. Petersburg (5.2 million inhabitants and approximately 800 km from Moscow).  
37  
38 The third largest country was Ukraine. In its capital Kiev, 3 other large supermarkets were visited  
39  
40 (Kiev-2) in addition to the first 3 that were visited (Kiev-1).  
41  
42  
43  
44  
45  
46  
47

## 48 **Analysis of TF**

49

50  
51 The samples from the various countries were analysed successively in the order they were obtained.  
52  
53 The samples that were obtained from the first countries that were visited (Moldova, Belarus,  
54  
55 Georgia, Armenia and Kyrgyzstan) were all analysed for TF. In the other countries that were visited  
56  
57 later, some packages were obtained with the same barcode number, the same visual appearance and  
58  
59  
60

1  
2  
3  
4 list of ingredients as those on packages where the samples had already been analysed. A sample  
5  
6 from the newly found package was analysed only if the best before date on that package exceeded  
7  
8 the best before date by more than 12 months on a package that already had been analysed.

9  
10  
11 Otherwise, the TF values were carried forward to the new package. (supplementary table B)

12  
13  
14 For analysis, the foods were homogenized, and the fatty acid content was analysed using gas  
15  
16 chromatography on a 60-m highly polar capillary column via a modification of the AOAC 996.06  
17  
18 method. Two procedures were modified in minor ways. In the AOAC 996.06 method, the final step  
19  
20 of the extraction/methylation called for 1 mL of hexane to be added. In the modified method, 4 mL  
21  
22 was added. The 4mL of hexane makes it possible to achieve the detection limit needed for low fat  
23  
24 samples. It provides extra volume for subsequent dilutions for high fat samples in order to achieve  
25  
26 results that fall within the range of the detector. The extra volume also provides additional extract  
27  
28 for further dilutions and subsequent analysis to optimize separation of cis/trans isomers or if more  
29  
30 resolution is needed between other fatty acids. In addition, in the modified method, C11:0  
31  
32 triundecanoin was used as an internal standard. This method makes it possible to obtain total fat as  
33  
34 triglycerides, which are then broken down into mono-, poly-, saturated and total TF. Total TF may  
35  
36 consist of up to 8 different *trans* fatty acids. Microbac Laboratories in Warrendale, Pennsylvania,  
37  
38 USA conducted all analytical work on the samples. The laboratory underwent annual proficiency  
39  
40 testing and was audited every other year to ensure compliance of this method with ISO 17025.

41  
42 From the peaks in the chromatogram, TF was calculated as a fraction (percent) of total fat in the  
43  
44 product. This value is primarily of interest for food producers, food chemists and food legislators.  
45  
46 The total amount of fat in 100 grams of the product was determined from the chromatogram. When  
47  
48 that value was multiplied by the TF fraction, the amount of TF in grams per 100 grams of the  
49  
50 product was calculated. This value is primarily of interest for the customers and for investigators  
51  
52 studying the health effect of intake of TF.  
53  
54  
55  
56  
57  
58  
59  
60

1  
2  
3  
4 The measurement does not distinguish I-TF from R-TF. If butter as a ruminant fat has been used in  
5 the product in addition to partially hydrogenated vegetable oil, some of the TF in the product may  
6 be derived from butter that on average contains a few percent and a maximum 5% fat as R-TF. In  
7 this paper, the term I-TF is used even though a minor portion in certain products may be TF derived  
8 from ruminant fat. If butter is present in a product that was analysed for TF in the present study and  
9 the value was higher than 5% TF of total fat, butter diluted the I-TF in the product because butter  
10 adds more non-TF than it adds TF. Values larger than 5% TF in the product are consequently the  
11 minimum values for I-TF as a percentage of total fat. In products that contain butter with less than  
12 5% TF as a percentage of total fat, the I-TF will be lower than the TF value. Such products are less  
13 important for the health of the consumer than products with much higher TF values and of less  
14 interest for health authorities and food scientists because of their low amounts of TF per 100 grams  
15 of product.

### 31 **Patient and Public involvement**

32  
33 Patients and the public were not involved in the present study.  
34  
35  
36  
37  
38  
39  
40  
41  
42  
43  
44

### 45 **Statistical analysis**

46  
47  
48 For each country, simple linear regression models were used to describe the change in % TF of total  
49 fat as a function of shelf life and over time recorded as a function of the date of production. The  
50 statistical software R was used (R Core Team, 2017).  
51  
52  
53  
54  
55  
56  
57  
58  
59  
60

## RESULTS

The number of different packages obtained in 3 different supermarkets in each of the 15 capitals totalled 1332. Samples from 1068 packages were analysed, and the TF values for each of the remaining 264 packages were taken from a similar package with an identical barcode but obtained earlier in another country and already analysed. Some 994 samples had more than 2% fat as TF.

The different products in each country were ranked according to the I-TF level, which was expressed as grams per 100 g of the product (figure 1). This latter value tells how much TF the consumer receives when 100 grams of the product is consumed. Each horizontal bar in each panel represents a product with more than 2% fat as TF. The number of these products is shown together with the number of packages, given in parenthesis that met the inclusion criteria. The products depicted in each panel are all different, but the same product may appear in the panel for two or more countries. The mean values of the percentages of fat that were I-TF in the collection of different products from each of the countries, together with the SD and maximum values, are shown. These percentages are of interest for food producers and for food authorities because they describe the fat that has been used in the food. In some products obtained in Armenia and in Kyrgyzstan, approximately 50% of the fat was I-TF (figure 1)

In the second largest city, Samarkand, in Uzbekistan, based on the barcode number, 29% of the packages were similar to the packages found in the capital, Taskent. In St. Petersburg, Russia, 30% of the products were similar to the products found in Moscow. In Kiev-2, which was the second collection region, 48% were similar to the packages found in the first collection region, Kiev-1.

Even though most of the products were different in the 2 different regions of the same country, the panels that reflect the availability of biscuits/cakes/wafers with more than 2% TF in fat are rather similar (figure 2). This result suggests that the panels presented for each country in figure 1 represent a pattern found elsewhere in the country and not only in the capital.

1  
2  
3  
4 For the 994 products with more than 2% fat as I-TF and that were obtained in the 15 capitals of the  
5 former Soviet Union, 52% were produced in Russia, 26% in Ukraine, 13% in own country, and 8%  
6  
7  
8 in some other countries, such as Poland and Bulgaria (table 1). For the products produced in Russia,  
9  
10  
11 85% were obtained outside of Russia and in the other countries of the former Soviet Union  
12  
13 combined, not including Ukraine and Lithuania. For the products produced in Ukraine, 69% were  
14  
15 obtained outside of Ukraine in the other countries, excluding Russia. The import patterns of pre-  
16  
17 packaged biscuits/cakes/wafers that differed from country to country were exemplified by the  
18  
19 patterns observed in Uzbekistan and Kazakhstan. (figure 3) The concentrations in grams of TF per  
20  
21 100 grams of product are shown in a panel for each of the two countries, and each product is placed  
22  
23 together with other products from the same country of origin. The numbers and the mean values of  
24  
25 the concentrations of TF in the fat of pre-packaged biscuits/cakes/wafers produced in Russia and in  
26  
27 Ukraine but obtained in the various countries of the former Soviet Union are shown in table 1. All  
28  
29 of the 75 different products with more than 2% fat as TF obtained in Moscow were produced in  
30  
31 Russia, and 81 of the 83 different products obtained in Kiev-1 were produced in Ukraine. The same  
32  
33 pattern was observed in St. Petersburg, Russia and Kiev-2, Ukraine. In each of the countries, except  
34  
35 for the 3 Baltic countries and Belarus, a majority of the products were imported from Russia and  
36  
37 Ukraine.  
38  
39  
40  
41  
42  
43

44 The analysis of shelf life was only conducted for packages produced in Russia and Ukraine, as they  
45  
46 were the main exporters to most of the other countries, and in many of the products, especially from  
47  
48 Russia, the length of the shelf life in months or days appeared on the package together with the date  
49  
50 of production. This is in contrast to pre-packaged biscuits/cakes/wafers produced in most countries  
51  
52 in the more western part of Europe. These packages only have the best before date, and the shelf life  
53  
54 of the product is usually hidden from the final customer. Products with less than 2% TF in the fat  
55  
56 had shelf lives of approximately 200 days, which is comparable to that of products with a much  
57  
58  
59  
60



1  
2  
3  
4 higher concentration of TF (table 2). The most frequent length of shelf life was 6 months, whether  
5  
6 the products were produced in Russia or in Ukraine. The slope of the regression line between shelf  
7  
8 life and % TF of total fat was significantly negative for Ukraine ( $p<0.0001$ ) and significantly  
9  
10 positive for Russia ( $p<0.0001$ ). Taken together, the data did not support the conclusion that the  
11  
12 higher the concentration of TF in the product, the longer was the shelf life.  
13  
14  
15

16 Since the samples of biscuits/cakes/wafers were collected between January 2015 and January 2017  
17  
18 and many were produced in Russia and in Ukraine, the % TF of total fat in the product was depicted  
19  
20 in relation to the date of production. The TF concentrations decreased significantly during the 2  
21  
22 years in Russia ( $p<0.0001$ ) as well as in Ukraine ( $p<0.0001$ ), but the decrease did not differ  
23  
24 significantly between the two countries ( $p=0.12$ ) (figure 4). The products from Ukraine had a higher  
25  
26 TF % at the start of the period than the products from Russia. Based on the slopes of the regression  
27  
28 lines in figure 4, the decline for the products from Ukraine was 12.4 % points and for products from  
29  
30 Russia 8.4 % points during the 2-year period.  
31  
32  
33  
34  
35  
36  
37  
38

## 39 **DISCUSSION**

### 40 41 42 **The principal findings**

43  
44 The findings of this study clearly demonstrate that from 2015-2016, I-TF was present in high  
45  
46 concentrations, i.e., more than 5% I-TF in the total fat, in many different brands of  
47  
48 biscuits/cakes/wafers in the countries of the former Soviet Union, except for the 3 Baltic countries.  
49  
50 This information was not previously available and may be of relevance because of the high  
51  
52 coronary mortality rate in these countries. In 3 of the countries, Russia, Ukraine and Belarus, by far  
53  
54 most of the products were produced in the country itself. For the other countries, except for the 3  
55  
56  
57  
58  
59  
60

1  
2  
3  
4 Baltic countries, the imports from food producers in Russia and Ukraine made up a major portion of  
5  
6 their products with high amounts of TF.  
7  
8

9  
10 In all of the shops, there were more packages containing biscuits/cakes/wafers that did not have the  
11  
12 inclusion terms on the label than packages that had one or more of the terms on the label. This result  
13  
14 suggests that there are plenty of biscuits/cakes/wafers without I-TF available in all of the 45  
15  
16 supermarkets. Of the 1332 packages that met the inclusion criteria and were bought, 335 (25%) of  
17  
18 the products had less than 2% fat as TF. This result suggests that the inclusion criteria are rather  
19  
20 broad in relation to the presence of TF and/or that the terms on the list of ingredients do not always  
21  
22 reflect the composition of the fat in the product. If the list of ingredients did not have the inclusion  
23  
24 words, the product may still have had high amounts of TF but were not bought and analysed for TF.  
25  
26  
27

28  
29 The amount of TF per 100 grams of product that was bought in Moscow did not exceed 6 grams  
30  
31 (figure 1), whereas several products that were produced in Russia but obtained in the other  
32  
33 countries, such as Uzbekistan and Kazakhstan, had more than 6 grams per 100 grams (figure 3).  
34

35  
36 The same was seen for the average concentration of I-TF in fat in products that were obtained in  
37  
38 Russia, which had a mean value and SD of 10(6) %, compared with considerably higher values in  
39  
40 Russian products that were obtained in the other countries (table 1). The same pattern was observed  
41  
42 for products that were bought in Ukraine and compared with products that were produced in  
43  
44 Ukraine but bought in some of the other countries (table 1). The products that were obtained in  
45  
46 Russia were bought more than a year later than the products that were produced in Russia but  
47  
48 obtained in the other countries. This same trend was also the case for the products that were  
49  
50 obtained in Ukraine and outside of Ukraine. Some of the difference may be due to a decrease in the  
51  
52 use of I-TF during the time period. (figure 4)  
53  
54  
55  
56  
57  
58  
59  
60

1  
2  
3  
4 I-TF has also been used in foods such as biscuits/cakes/wafers because it apparently prolongs the  
5 shelf life of the foods. This fact is presently not supported by the findings of this study because 186  
6 products that were produced in Russia with a shelf life of 6 months had TF concentrations of 11  
7 (7)% mean value (SD) and 37 products with a shelf life of 12 months also had TF concentrations of  
8 11 (7)%. The corresponding values for products that were produced in Ukraine were for 86 products  
9 with a shelf life of 6 months, 20 (9) % and for 30 products with a shelf life of 12 months, 10 (6) %.

10  
11  
12  
13  
14  
15  
16  
17  
18  
19 Based on the plasma concentrations of TF in nationally representative groups in 2010 in the USA  
20 (3 years after the introduction of mandatory labelling of TF on pre-packaged foods and in spite of a  
21 nearly 50% lower average TF concentration in plasma), there is still a subgroup with very high TF  
22 concentrations, reflecting a subgroup in the general population with a high consumption of TF.<sup>4</sup> A  
23 vicious cycle apparently occurs: as long as foods with high amounts of I-TF are present in shops,  
24 some consumers will buy them, and as long as they are bought, the foods will be available. This  
25 cycle may also occur in the countries of the former Soviet Union. Despite a decline in the average  
26 intake of I-TF in many countries in Western Europe,<sup>16</sup> in 2015, the WHO estimated that millions of  
27 Europeans still consume TF at levels that significantly increase their risk of CHD.<sup>23</sup> The findings  
28 reported in the present investigation confirm this estimate.

### 41 42 43 44 45 46 **Strength and weaknesses of the study**

47  
48  
49 The strengths of this study include that the same procedure was used to obtain popular foods in  
50 large supermarkets in all 15 countries of the former Soviet Union and in two different regions in the  
51 3 largest countries and that the samples were analysed for TF in the same laboratory. A limitation of  
52 this study is that no other food groups (such as shortenings and margarines) and no un-packaged  
53 foods (such as baked goods, sweet rolls, pastries, buns and even un-packaged biscuits/cakes/wafers)

1  
2  
3  
4 were investigated. It was also assumed that if the inclusion words are not present in the list of  
5  
6 ingredients, the product contained less than 2% total fat as TF. The presence of high concentrations  
7  
8 of I-TF in biscuits/cakes/wafers may be a sign that I-TF is used in other foods as well. Another  
9  
10 limitation is that the average daily intake of I-TF was not measured in any subgroups of the  
11  
12 populations but instead was inferred from the availability of popular foods with high amounts of I-  
13  
14 TF in large supermarkets. The competition for shelf space in supermarkets is usually fierce. If  
15  
16 products do not sell, they are rapidly replaced by other products. A relevant subgroup for intake  
17  
18 studies would be the consumers who buy pre-packaged biscuits/cakes/wafers.  
19  
20  
21  
22  
23  
24  
25

### 26 **Legislation and industrially produced *trans* fat in foods**

27  
28  
29 In the USA in 2015, the FDA revoked the previous GRAS (Generally Recognized As Safe) status  
30  
31 of partially hydrogenated oils, which was a step that may remove I-TF from food production in the  
32  
33 USA before July 2018, and Canada is following suit.<sup>24</sup> In 2009, Austria and Switzerland introduced  
34  
35 a legislative ban similar to the Danish ban from 2004, followed by Iceland in 2011, Hungary and  
36  
37 Norway in 2014, and initiated by Latvia, Georgia, Lithuania, Slovenia and other Eastern European  
38  
39 countries including Russia between 2016 and 2018.<sup>13,25,26,27</sup> The samples for the present study were  
40  
41 all collected in the various capitals in 2015 or 2016 (supplementary table A) before any of the  
42  
43 legislative restrictions of I-TF in food were fully implemented in these countries. However, some of  
44  
45 their food producers were most likely aware of future legislation. The producers may have  
46  
47 gradually started to remove I-TF from some of their products in 2015 and 2016. This removal may  
48  
49 be the explanation for the relatively few products with TF in Lithuania and in Latvia. This  
50  
51 explanation is apparently not valid for Estonia, which only had 8 products with more than 2% fat as  
52  
53  
54  
55  
56  
57  
58  
59  
60

1  
2  
3  
4 TF and has no internationally published plan for a legislation similar to the two other Baltic  
5  
6 countries. (figure 1 and table 1)  
7  
8

9  
10 The European Union published a report in 2015, which was originally commissioned in 2011, that  
11  
12 “indicates the need to continue and expedite work in this area by collecting more information”.<sup>28,29</sup>  
13  
14 In the WHO-Europe investigation of the various ways to reduce I-TF in foods, it was concluded that  
15  
16 establishing a legal limit for the content of I-TF in foods is potentially the only available option that  
17  
18 reduces the risks associated with I-TF faced by all consumers and that doing so may contribute to  
19  
20 reducing inequalities. Such a policy is unique in its combination of efficacy, cost-effectiveness and  
21  
22 a low potential for negative impact. Removing I-TF from the food supply is possibly one of the  
23  
24 most straightforward public health interventions for reducing the risk of CHD.<sup>23</sup> The trend of using  
25  
26 fat with lower amounts of I-TF (figure 4) over time will probably accelerate in 2018 among food  
27  
28 factories in Russia due to the Russian legislation <sup>27</sup> and among factories in Ukraine due to  
29  
30 competition with Russian factories. The intake of I-TF in the two largest countries may decrease,  
31  
32 along with the intake of I-TF among millions of inhabitants in the adjacent countries due to the  
33  
34 large export of biscuits/cakes/wafers from Russia and Ukraine to these countries.<sup>18</sup> (table 1)  
35  
36  
37  
38  
39  
40  
41  
42

### 43 **Future research and implications for policy makers**

44  
45  
46 It is of considerable interest whether coronary mortality and admission rates for CHD and stroke  
47  
48 will change in countries that have recently introduced legislation that restricts the use of I-TF or  
49  
50 intend to do so in the near future in the same way these rates changed in Denmark and in certain  
51  
52 counties in New York.<sup>7,8,9</sup>  
53  
54

55  
56  
57 On the basis of data from 2009 to 2011, there is a five-fold difference in age-standardized  
58  
59 mortality rates of CHD between some countries in Western Europe and countries in Central and  
60

1  
2  
3  
4 Eastern Europe, with Central Asia having the highest rates.<sup>10</sup> Central Eastern Europe and Central  
5  
6 Asia are the regions in the world with the highest current age-standardized cardiovascular mortality  
7  
8 rates, which are more than twice those of Latin America and the Caribbean.<sup>30</sup> These differences  
9  
10 cannot be explained only by differences in the intake of I-TF between the countries. The present  
11  
12 study demonstrates that there is a presence of I-TF in popular foods in the countries of the former  
13  
14 Soviet Union, which have excessively high CHD mortality rates. The restriction of the use of I-TF  
15  
16 in foods, either voluntarily by food producers or more efficiently by legislation, may be an easily  
17  
18 implemented primary strategy for some reduction of cardiovascular diseases in these countries.  
19  
20  
21  
22  
23  
24  
25

## 26 REFERENCES

- 27  
28  
29  
30 1. Gebauer SK, Destailats F, Dionisi F, *et al.* Vaccenic acid and trans fatty acid isomers from  
31  
32 partially hydrogenated oil both adversely affect LDL cholesterol: a double-blind, randomized  
33  
34 controlled trial. *Am J Clin Nutr* 2015;102(6):1339-46.  
35  
36  
37
- 38 2. de Souza RJ, Mente A, Maroleanu A, *et al.* Intake of saturated and trans unsaturated fatty  
39  
40 acids and risk of all cause mortality, cardiovascular disease, and type 2 diabetes: systematic  
41  
42 review and meta-analysis of observational studies. *BMJ* 2015;351: h3978.  
43  
44 doi:101136/bmj.h3978.  
45  
46  
47
- 48 3. Li H, Zhang Q, Song J, *et al.* Plasma trans-fatty acids levels and mortality: a cohort study  
49  
50 based on 1999-2000 National Health and Nutrition Examination Survey (NHANES). *Lipids*  
51  
52 *Health Dis* 2017; 16: 176.doi:10.1186/s12944-017-0567-6.  
53  
54  
55  
56  
57  
58  
59  
60

- 1  
2  
3  
4 4. Yang Q, Zhang Z, Loustalot F, *et al.* Plasma *trans*-Fatty Acid Concentrations Continue to Be  
5  
6 Associated with Serum Lipid and Lipoprotein Concentrations among US Adults after  
7  
8 Reductions in *trans*-Fatty Acid Intake. *J Nutr* 2017;147:896–07.  
9  
10
- 11  
12 5. Hirata Y, Takahashi M, Kudoh Y, *et al.* *Trans*-Fatty acids promote proinflammatory signaling  
13  
14 and cell death by stimulating the apoptosis signal-regulating kinase 1 (ASK1)-p38 pathway. *J*  
15  
16 *Biol Chem.* 2017; 292: 8174–85 doi: 10.1074/jbc.M116.771519.  
17  
18
- 19  
20 6. Brouwer IA, Wanders AJ, Katan MB. *Trans* fatty acids and cardiovascular health: research  
21  
22 completed? *Eur J Clin Nutr* 2013;67:541–47.  
23  
24
- 25  
26 7. Restrepo BJ, Rieger M. Denmark's Policy on Artificial Trans Fat and Cardiovascular Disease.  
27  
28 *Am J Prev Med* 2016;50:69–76.  
29
- 30  
31 8. Restrepo BJ, Rieger M. Trans fat and cardiovascular disease mortality: Evidence from bans in  
32  
33 restaurants in New York. *J. Health Econ* 2016;45:176–196.  
34  
35
- 36  
37 9. Brandt EJ, Myerson R, Perraiillon MC, *et al.* Hospital Admissions for Myocardial Infarction  
38  
39 and Stroke Before and After the *Trans*-Fatty Acid Restrictions in New York. *JAMA Cardiol*  
40  
41 2017;2:627–634.  
42  
43
- 44  
45 10. Nichols M, Townsend N, Scarborough P, *et al.* Cardiovascular disease in Europe 2014:  
46  
47 epidemiological update. *Eur Heart J* 2014;35:2950–59.  
48
- 49  
50 11. Micha R, Khatibzadeh S, Shi P, *et al.* Global, regional, and national consumption levels of  
51  
52 dietary fats and oils in 1990 and 2010: a systematic analysis including 266 country-specific  
53  
54 nutrition surveys. *BMJ* 2014; 348:g2272 doi:10.1136/bmj.g2272.  
55  
56  
57  
58  
59  
60

- 1  
2  
3  
4 12. Perova NV, Metel'skaia VA, Boytsov SA. [Trans isomers of unsaturated fatty acids increase  
5 the risk of atherosclerosis-related circulatory system diseases].[Article in Russian]. *Ter Arkh*  
6  
7 2013;85:113-7.  
8  
9
- 10  
11  
12 13. Boytsov SA, Perova NV. To lower trans fatty acid intake as an important condition for the  
13 reduction of cardiovascular Mortality (Article). *Profilakticheskaya Meditsina* 2017;20:4-9.  
14  
15
- 16  
17 14. Meremäe K, Roasto M, Kuusik S, *et al.* Trans Fatty Acid Contents in Selected Dietary Fats  
18 in the Estonian Market. *J Food Sci.* 2012;77:163-8.  
19  
20
- 21  
22 15. FEEDcities project. The food environment description in cities in Eastern Europe and  
23 Central Asia - Tajikistan and Kyrgyzstan. Technical report, WHO Europe, June 2017 and  
24 August 2017 [http://www.euro.who.int/](http://www.euro.who.int/__data/assets/pdf_file/0012/353001/FEED-TJK-report.pdf?ua=1)  
25 [\\_data/assets/pdf\\_file/0012/353001/FEED-TJK-](http://www.euro.who.int/__data/assets/pdf_file/0012/353001/FEED-TJK-report.pdf?ua=1)  
26 [report.pdf?ua=1](http://www.euro.who.int/__data/assets/pdf_file/0012/353001/FEED-TJK-report.pdf?ua=1) [http://www.euro.who.int/](http://www.euro.who.int/__data/assets/pdf_file/0006/351996/FEED-KGZ-report-web-new.pdf?ua=1)  
27 [\\_data/assets/pdf\\_file/0006/351996/FEED-KGZ-](http://www.euro.who.int/__data/assets/pdf_file/0006/351996/FEED-KGZ-report-web-new.pdf?ua=1)  
28 [report-web-new.pdf?ua=1](http://www.euro.who.int/__data/assets/pdf_file/0006/351996/FEED-KGZ-report-web-new.pdf?ua=1)  
29  
30  
31  
32  
33  
34 (Accessed Nov 2018).  
35  
36
- 37 16. Wanders AJ, Zock PL, Brouwer IA. Trans Fat Intake and Its Dietary Sources in General  
38 Populations Worldwide: A Systematic Review. *Nutrients.* 2017;9:840;  
39  
40  
41  
42  
43  
44  
45  
46  
47  
48  
49  
50  
51  
52  
53  
54  
55  
56  
57  
58  
59  
60
17. Stender S, Astrup A, Dyerberg J. A trans European Union difference in the decline in trans  
fatty acids in popular foods: a market basket investigation. *BMJ Open* 2012;17:2 e000859.  
doi: 10.1136/bmjopen-2012-000859.
18. [https://en.wikipedia.org/wiki/Post-Soviet\\_states#General\\_statistics](https://en.wikipedia.org/wiki/Post-Soviet_states#General_statistics) (Accessed Nov 2018).
19. Kravic SZ, Suturovic ZJ, Svarc-Gajic JV, *et al.* Fatty acid composition including *trans*-  
isomers of Serbian biscuits. *Hem Ind* 2011;65:139–46.



- 1
- 2
- 3
- 4 20. Stender S, Astrup A, Dyerberg J. Tracing artificial *trans* fat in popular foods in Europe: a
- 5 market basket investigation. *BMJ Open* 2014;4: e005218.
- 6
- 7
- 8
- 9
- 10 21. Stender S, Astrup A, Dyerberg J. Artificial trans fat in popular foods in 2012 and in 2014: a
- 11 market basket investigation in six European countries. *BMJ Open* 2016;6: e010673.
- 12
- 13
- 14
- 15 22. [https://da.wikipedia.org/wiki/International\\_Article\\_Number\\_\(EAN\)](https://da.wikipedia.org/wiki/International_Article_Number_(EAN)) (Accessed Nov 2018).
- 16
- 17
- 18 23. Eliminating trans fats in Europe – A policy brief ( 2015) [http://www.euro.who.int/en/health-](http://www.euro.who.int/en/health-topics/disease-prevention/nutrition/publications/2015/eliminating-trans-fats-in-europe-a-policy-brief-2015)
- 19 [topics/disease-prevention/nutrition/publications/2015/eliminating-trans-fats-in-europe-a-](http://www.euro.who.int/en/health-topics/disease-prevention/nutrition/publications/2015/eliminating-trans-fats-in-europe-a-policy-brief-2015)
- 20 [policy-brief-2015](http://www.euro.who.int/en/health-topics/disease-prevention/nutrition/publications/2015/eliminating-trans-fats-in-europe-a-policy-brief-2015) (Accessed Nov 2018).
- 21
- 22
- 23
- 24
- 25
- 26 24. FDA Cuts Trans Fat in Processed Foods [https://experiencelife.com/article/u-s-trans-](https://experiencelife.com/article/u-s-trans-fat-ban-goes-into-effect/)
- 27 [fat-ban-goes-into-effect/](https://experiencelife.com/article/u-s-trans-fat-ban-goes-into-effect/) (Accessed Nov 2018)
- 28
- 29
- 30
- 31 25. Vučić V, Arsić A, Petrović S, *et al.* Trans fatty acid content in Serbian margarines: Urgent
- 32 need for legislative changes and consumer information. *Food Chem* 2015;185:437–40.
- 33
- 34
- 35
- 36
- 37 26. Wilczek MM, Olszewski R, Krupienicz A. *Trans*-Fatty Acids and Cardiovascular Disease:
- 38 Urgent Need for Legislation. *Cardiology*. 2017;138:254–58.
- 39
- 40
- 41
- 42 27. Trans fat legislation in Republic of Russia
- 43 [http://rospotrebnadzor.ru/about/info/news/news\\_details.php?ELEMENT\\_ID=9510&sphras](http://rospotrebnadzor.ru/about/info/news/news_details.php?ELEMENT_ID=9510&sphrase_id=1487827)
- 44 [e\\_id=1487827](http://rospotrebnadzor.ru/about/info/news/news_details.php?ELEMENT_ID=9510&sphrase_id=1487827) (Accessed Nov 2018)
- 45
- 46
- 47
- 48
- 49
- 50 28. Report from the Commission to the European parliament and the Council regarding trans
- 51 fats in foods and in the overall diet of the Union population. (03-12-2015)
- 52 [http://ec.europa.eu/dgs/health\\_food-safety/dyna/enews/enews.cfm?al\\_id=1650](http://ec.europa.eu/dgs/health_food-safety/dyna/enews/enews.cfm?al_id=1650) (Accessed
- 53 Nov 2018).
- 54
- 55
- 56
- 57
- 58
- 59
- 60

- 1  
2  
3  
4 29. [https://ec.europa.eu/info/consultations/open-public-consultation-initiative-limit-industrial-](https://ec.europa.eu/info/consultations/open-public-consultation-initiative-limit-industrial-trans-fats-intakes-eu_en)  
5 [trans-fats-intakes-eu\\_en](https://ec.europa.eu/info/consultations/open-public-consultation-initiative-limit-industrial-trans-fats-intakes-eu_en) (Accessed Nov 2018)  
6  
7

8  
9 [http://ec.europa.eu/smart-regulation/roadmaps/docs/2016\\_sante\\_143\\_trans\\_fats\\_en.pdf](http://ec.europa.eu/smart-regulation/roadmaps/docs/2016_sante_143_trans_fats_en.pdf)  
10 (Accessed Nov 2018).  
11  
12

- 13  
14  
15 30 Barquera S, Pedroza-Tobías A, Medina C, *et al.* Global Overview of the Epidemiology of  
16 Atherosclerotic Cardiovascular Disease. *Arch Med Res* 2015;46:328–38  
17  
18  
19

### 20 21 22 23 **Contributors:**

24  
25  
26 SS was responsible for the concept design of the study, for collection of food items, registration,  
27 and labelling, and writing the manuscript. SS is the manuscripts guarantor.  
28  
29

30  
31  
32 **Funding:** This work was supported by Jenny Vissings Foundation, University of Copenhagen and  
33 Department of Clinical Biochemistry, Copenhagen University Hospital, Gentofte, Denmark.  
34  
35

### 36 37 **Role of the funding source**

38  
39  
40 The sponsors of the study had no role in the study design, data collection, analysis, and  
41 interpretation, the writing of the report, or the decision to submit the article for publication. The  
42 corresponding author had full access to all the data for the study and had final responsibility for the  
43 decision to submit the manuscript for publication.  
44  
45  
46  
47  
48

### 49 50 **Competing interests:**

51  
52  
53 None declared  
54  
55

### 56 57 **Ethics approval**

58  
59  
60

22

1  
2  
3  
4 The study does not require an approval from the Ethics committee  
5  
6

7 **Acknowledgements:**  
8  
9

10 The authors acknowledge the support from Jenny Vissings Foundation, University of Copenhagen  
11 and the Department of Clinical Biochemistry, Copenhagen University Hospital, Gentofte, Denmark.  
12  
13  
14

15  
16 **Data sharing statement:**  
17

18  
19 The data used to construct figures 1-4, tables 1 and 2, and supplementary table A and B can be  
20 shared by e-mailing Steen Stender.  
21  
22  
23  
24  
25  
26  
27  
28  
29  
30  
31  
32

33  
34 **LEGENDS**  
35

36  
37 **Figure 1**  
38

39  
40 Amounts of industrially produced *trans* fat (I-TF) in 100 grams of pre-packaged  
41 biscuits/cakes/wafers purchased from 2015-2016 in three supermarkets in each of the 15 capitals.  
42 Each bar in a panel represents a unique product that was bought in that capital. N is the number of  
43 different products with more than 2% TF in the total fat content. (N) is the number of packages that  
44 met the inclusion criteria. X is the mean value and the standard deviation of the percentages of I-TF  
45 in the total fat of the N products, M is the maximal value of I-TF as a percentage of total fat. Each  
46 bar in all 15 panels has the same thickness, which means that the area of the bars is comparable  
47 between the different panels.  
48  
49  
50  
51  
52  
53  
54  
55  
56  
57  
58  
59  
60

**Figure 2**

The legend for this figure is similar to the legend for figure 1. The 4 upper panels show the results for 2 of the capitals and for 2 other large cities in the same country. The lowest 2 panels show the results from purchases from 3 large supermarkets in Kiev (Kiev-1) and from 3 other large supermarkets in the same city (Kiev-2).

**Figure 3**

Amounts of industrially produced *trans* fat (I-TF) in 100 grams of pre-packaged biscuits/cakes/wafers that were obtained in Uzbekistan and in Kazakhstan, with each product in the panel placed together with other products from the same country of origin.

**Figure 4**

Date of production and I-TF as a percentage of total fat for pre-packaged biscuits/cakes/wafers that were produced in Russia or Ukraine and obtained in the countries of the former Soviet Union between January 2015 and January 2017. Products obtained in Samarkand, St. Petersburg and Kiev 2 were included if the products had their own *trans* fat analysis. Only products with more than 2% fat as I-TF were included.

**Table 1**

Country of origin for pre-packaged biscuits/cakes/wafers with more than 2% fat as I-TF obtained in the 15 countries of the former Soviet Union.

**Table 2**

Shelf life of pre-packaged biscuits/cakes/wafers produced in Russia or in Ukraine and obtained in the countries of the former Soviet Union between January 2015 and January 2017.

**Contributors:**

SS was responsible for designing the study, collecting the food items, recording and labelling the samples and writing the manuscript. SS is the guarantor of the manuscript.

**Table 1.** Country of origin of pre-packaged biscuits/cakes/wafers with more than 2% fat as *trans* fat obtained in the various countries.

| Country               | Capital               | All*                                   |            |            | Produced in Russia                 |            |             | Produced in Ukraine                |           |             | Produced in own country            |             |          | Produced in other countries        |            |            |            |          |          |             |            |             |
|-----------------------|-----------------------|----------------------------------------|------------|------------|------------------------------------|------------|-------------|------------------------------------|-----------|-------------|------------------------------------|-------------|----------|------------------------------------|------------|------------|------------|----------|----------|-------------|------------|-------------|
|                       |                       | <i>Trans</i> fat per 100 grams fat ≥2% |            |            | <i>Trans</i> fat per 100 grams fat |            |             | <i>Trans</i> fat per 100 grams fat |           |             | <i>Trans</i> fat per 100 grams fat |             |          | <i>Trans</i> fat per 100 grams fat |            |            |            |          |          |             |            |             |
|                       |                       | N                                      | N          | %**        | Mean                               | SD         | Max         | N                                  | %**       | Mean        | SD                                 | Max         | N        | %**                                | Mean       | SD         | Max        | N        | %**      | Mean        | SD         | Max         |
| Armenia               | Yerevan               | 91                                     | 50         | 55         | 17.6                               | 8.8        | 50.8        | 33                                 | 36        | 25.5        | 13.8                               | 50.0        | 7        | 8                                  | 20.0       | 8.0        | 29.6       | 1        | 1        | 10.2        |            | 10.2        |
| Belarus               | Minsk                 | 98                                     | 20         | 20         | 14.8                               | 8.5        | 35.5        | 5                                  | 5         | 22.5        | 5.6                                | 32.0        | 71       | 72                                 | 17.4       | 8.9        | 39.9       | 2        | 2        | 6.8         | 5.4        | 10.6        |
| Tajikistan            | Dushanbe              | 136                                    | 121        | 89         | 10.9                               | 7.0        | 33.4        | 10                                 | 7         | 15.0        | 7.7                                | 32.9        | 4        | 3                                  | 9.1        | 1.7        | 10.3       | 1        | 1        | 2.7         |            | 2.7         |
| Kyrgyzstan            | Bishkek               | 81                                     | 58         | 72         | 14.9                               | 8.3        | 30.3        | 15                                 | 19        | 28.6        | 12.9                               | 49.7        | 4        | 5                                  | 7.0        | 4.1        | 12.2       | 4        | 5        | 2.8         | 0.6        | 3.6         |
| Azerbaijan            | Baku                  | 85                                     | 58         | 68         | 12.3                               | 7.3        | 34.6        | 15                                 | 18        | 12.9        | 1.3                                | 33.4        | 1        | 1                                  | 3.1        |            | 3.1        | 11       | 13       | 12.5        | 5.5        | 21.6        |
| Moldova               | Chisinau              | 53                                     | 10         | 19         | 24.6                               | 7.8        | 35.2        | 25                                 | 47        | 25.8        | 8.0                                | 41.5        | 12       | 23                                 | 10.1       | 5.9        | 22.2       | 6        | 11       | 12.0        | 11.3       | 32.1        |
| Ukraine               | Kiev-1                | 83                                     | 0          | 0          |                                    |            |             | 81                                 | 98        | 13.8        | 9.7                                | 41.6        |          |                                    |            |            |            | 2        | 2        | 4.2         | 1.0        | 4.9         |
| <i>Ukraine ***</i>    | <i>Kiev-2</i>         | <i>64</i>                              | <i>0</i>   | <i>0</i>   |                                    |            |             | <i>62</i>                          | <i>97</i> | <i>14.3</i> | <i>11.0</i>                        | <i>45.4</i> |          |                                    |            |            |            | <i>2</i> | <i>3</i> | <i>12.1</i> | <i>0.5</i> | <i>12.4</i> |
| Uzbekistan            | Taskent               | 77                                     | 50         | 65         | 10.3                               | 7.5        | 35.2        | 20                                 | 26        | 16.2        | 9.6                                | 33.4        | 6        | 8                                  | 11.2       | 4.6        | 16.2       | 1        | 1        | 6.7         |            | 6.7         |
| <i>Uzbekistan ***</i> | <i>Samarkand</i>      | <i>63</i>                              | <i>30</i>  | <i>48</i>  | <i>13.5</i>                        | <i>7.7</i> | <i>29.0</i> | <i>28</i>                          | <i>44</i> | <i>18.7</i> | <i>11.8</i>                        | <i>42.7</i> | <i>5</i> | <i>8</i>                           | <i>4.1</i> | <i>2.5</i> | <i>8.4</i> | <i>0</i> | <i>0</i> |             |            |             |
| Turkmenistan          | Ashgabat              | 54                                     | 18         | 33         | 13.3                               | 8.0        | 28.9        | 24                                 | 44        | 18.4        | 10.6                               | 38.0        | 0        | 0                                  |            |            |            | 12       | 22       | 12.6        | 7.3        | 26.2        |
| Georgia               | Tbilisi               | 47                                     | 23         | 49         | 15.7                               | 9.7        | 36.1        | 8                                  | 17        | 21.3        | 9.3                                | 34.6        | 7        | 15                                 | 23.3       | 9.9        | 33.3       | 9        | 19       | 7.5         | 4.8        | 16.4        |
| Russia                | Moscow                | 75                                     | 75         | 100        | 9.5                                | 5.6        | 27.0        | 0                                  | 0         |             |                                    |             |          |                                    |            |            |            | 0        | 0        |             |            |             |
| <i>Russia ***</i>     | <i>St. Petersburg</i> | <i>105</i>                             | <i>105</i> | <i>100</i> | <i>9.3</i>                         | <i>5.0</i> | <i>27.0</i> | <i>0</i>                           | <i>0</i>  |             |                                    |             |          |                                    |            |            |            | <i>0</i> | <i>0</i> |             |            |             |
| Kazakhstan            | Astana                | 50                                     | 28         | 56         | 11.3                               | 7.6        | 29.1        | 12                                 | 24        | 10.9        | 5.6                                | 19.3        | 7        | 14                                 | 12.0       | 8.7        | 28.7       | 3        | 6        | 11.8        | 7.6        | 20.5        |
| Lithuania             | Vilnius               | 32                                     | 0          | 0          |                                    |            |             | 9                                  | 28        | 10.5        | 8.3                                | 32.5        | 9        | 28                                 | 8.4        | 4.6        | 15.7       | 14       | 44       | 6.7         | 3.8        | 14.0        |
| Latvia                | Riga                  | 24                                     | 5          | 21         | 9.0                                | 3.8        | 12.2        | 4                                  | 17        | 8.9         | 3.8                                | 14.5        | 5        | 21                                 | 5.5        | 4.1        | 11.3       | 10       | 42       | 6.7         | 3.2        | 11.0        |
| Estonia               | Tallinn               | 8                                      | 1          | 13         | 29.2                               |            | 29.2        | 2                                  | 25        | 19.3        | 17.0                               | 31.3        | 0        | 0                                  |            |            |            | 5        | 63       | 8.0         | 3.6        | 11.3        |
| 15 countries together |                       | 994                                    | 517        |            |                                    |            |             | 263                                |           |             |                                    |             | 133      |                                    |            |            |            | 81       |          |             |            |             |

All\* is the number of different packages of biscuits/cakes/wafers with ≥ 2% *trans* fat per 100 grams fat in each country

%\*\* is the number of samples with more than 2% fat as *trans* fat as a percent of all samples obtained in that country with more than 2% fat as *trans* fat

\*\*\* the lines in italics indicate values for biscuits/cakes/wafers obtained by the same procedure but in extra regions of the same country. The values are not included in the bottom line

**Table 2.** Shelf life of pre-packaged biscuits/cakes/wafers produced in Russia and Ukraine.

|                              | Produced in Russia |         | Produced in Ukraine |         |
|------------------------------|--------------------|---------|---------------------|---------|
| <b>Trans fat as % of fat</b> | < 2%               | ≥ 2%    | <2%                 | ≥ 2%    |
| <b>Number of samples*</b>    | 140                | 453     | 24                  | 220     |
| <b>Shelf life in days</b>    |                    |         |                     |         |
| Mean (SD)                    | 202(83)            | 219(70) | 286(94)             | 215(85) |
| Range                        | 59-547             | 46-396  | 123-366             | 46-546  |

\* Samples obtained in Samarkand, St. Petersburg, and Kiev-2 were included if these samples had their own *trans* fat analysis and a readable shelf life on the package

Figure 1

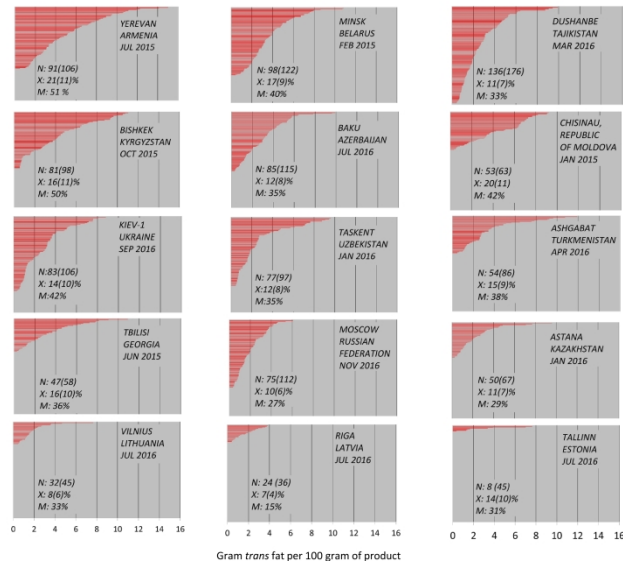

Amounts of industrially produced trans fat (I-TF) in 100 grams of pre-packaged biscuits/cakes/wafers purchased from 2015-2016 in three supermarkets in each of the 15 capitals. Each bar in a panel represents a unique product that was bought in that capital. N is the number of different products with more than 2% TF in the total fat content. (N) is the number of packages that met the inclusion criteria. X is the mean value and the standard deviation of the percentages of I-TF in the total fat of the N products, M is the maximal value of I-TF as a percentage of total fat. Each bar in all 15 panels has the same thickness, which means that the area of the bars is comparable between the different panels.

338x190mm (300 x 300 DPI)



Figure 2

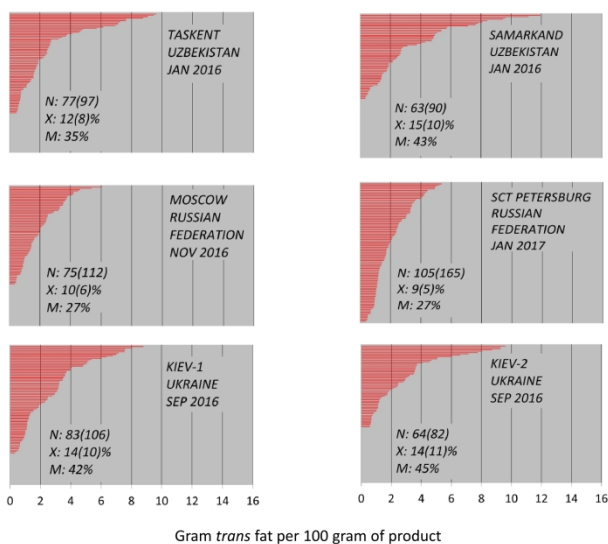

The legend for this figure is similar to the legend for figure 1. The 4 upper panels show the results for 2 of the capitals and for 2 other large cities in the same country. The lowest 2 panels show the results from purchases from 3 large supermarkets in Kiev (Kiev-1) and from 3 other large supermarkets in the same city (Kiev-2).

338x190mm (300 x 300 DPI)

Figure 3

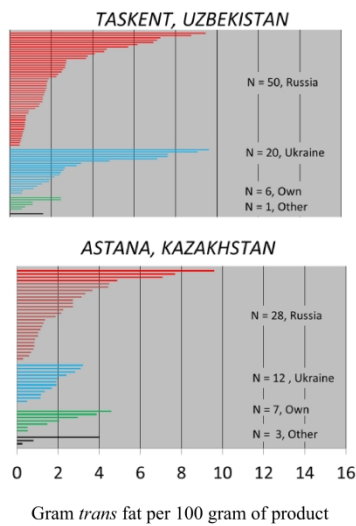

Amounts of industrially produced trans fat (I-TF) in 100 grams of pre-packaged biscuits/cakes/wafers that were obtained in Uzbekistan and in Kazakhstan, with each product in the panel placed together with other products from the same country of origin.

338x190mm (300 x 300 DPI)

Figure 4

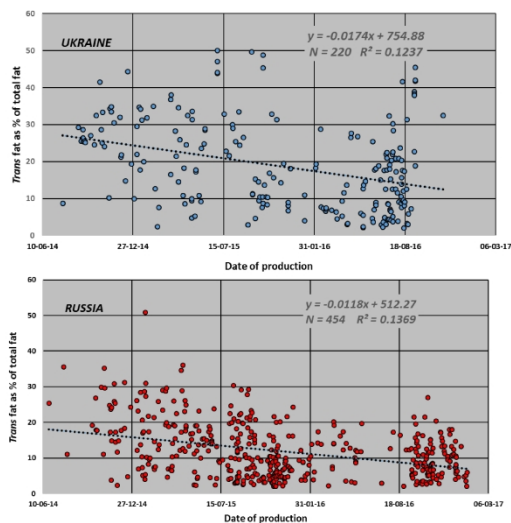

Date of production and I-TF as a percentage of total fat for pre-packaged biscuits/cakes/wafers that were produced in Russia or Ukraine and obtained in the countries of the former Soviet Union between January 2015 and January 2017. Products obtained in Samarkand, Sct Petersburg and Kiev 2 were included if the products had their own trans fat analysis. Only products with more than 2% fat as I-TF were included.

338x190mm (300 x 300 DPI)

## Supplementary table A

Names and population of the countries of the former Soviet Union and the mortalities of coronary heart disease(CHD) and cardiovascular disease (CVD)

| Country             | Capital  | Visit<br>Month | Visit<br>Year | Capital<br>population<br>millions* | Country<br>population<br>millions* | Year | CHD-mortality<br>male<br>per 100.000 | CVD-mortality<br>male<br>per 100.000 | Year | CHD-mortality<br>female<br>per 100.000 | CVD-mortality<br>female<br>per 100.000 |
|---------------------|----------|----------------|---------------|------------------------------------|------------------------------------|------|--------------------------------------|--------------------------------------|------|----------------------------------------|----------------------------------------|
| Republic of Moldova | Chisinau | Jan            | 2015          | 0.669                              | 3.6                                | 2014 | 528                                  | 790                                  | 2012 | 365                                    | 564                                    |
| Belarus             | Minsk    | Feb            | 2015          | 1.893                              | 9.5                                | 2016 | 642                                  | 893                                  | 2009 | 284                                    | 428                                    |
| Georgia             | Tbilisi  | Jun            | 2015          | 1.173                              | 3.7                                | 2016 | 80                                   | 325                                  | 2010 | 39                                     | 190                                    |
| Armenia             | Yerevan  | Jul            | 2015          | 1.06                               | 3.0                                | 2016 | 352                                  | 525                                  | 2012 | 211                                    | 357                                    |
| Kyrgyzstan          | Bishkek  | Oct            | 2015          | 0.871                              | 5.5                                | 2009 | 534                                  | 842                                  | 2010 | 373                                    | 588                                    |
| Kazakhstan          | Astana   | Jan            | 2016          | 0.639                              | 17.7                               | 2016 | 265                                  | 810                                  | 2010 | 124                                    | 485                                    |
| Uzbekistan          | Taskent  | Jan            | 2016          | 2.31                               | 31.6                               | 2016 | 454                                  | 858                                  | 2005 | 321                                    | 662                                    |
| Tajikistan          | Dushanbe | Mar            | 2016          | 0.779                              | 8.6                                | 2015 | 304                                  | 710                                  | 2004 | 186                                    | 504                                    |
| Turkmenistan        | Ashgabat | Apr            | 2016          | 1.031                              | 6.7                                | 2011 | 563                                  | 1017                                 | 1998 | 333                                    | 717                                    |
| Estonia             | Tallinn  | Feb            | 2016          | 0.444                              | 1.3                                | 2016 | 256                                  | 501                                  | 2012 | 118                                    | 269                                    |
| Latvia              | Riga     | Jul            | 2016          | 0.43                               | 2.0                                | 2014 | 355                                  | 655                                  | 2012 | 174                                    | 353                                    |
| Lithuania           | Vilnius  | Jul            | 2016          | 0.537                              | 2.9                                | 2016 | 436                                  | 667                                  | 2010 | 239                                    | 383                                    |
| Azerbaijan          | Baku     | jul            | 2016          | 2.182                              | 9.8                                | 2016 | 149                                  | 617                                  | 2007 | 93                                     | 489                                    |
| Ukraine             | Kiev     | Sep            | 2016          | 2.847                              | 42.5                               | 2013 | 600                                  | 873                                  | 2012 | 356                                    | 533                                    |
| Russian Federation  | Moscow   | Nov            | 2015          | 13.197                             | 146.7                              | 2016 | 501                                  | 915                                  | 2010 | 255                                    | 517                                    |
| UK                  |          |                |               |                                    |                                    |      | 111                                  | 205                                  | 2010 | 49                                     | 129                                    |
| Denmark             |          |                |               |                                    |                                    |      | 67                                   | 174                                  | 2011 | 33                                     | 111                                    |

\* Values from Wikipedia.<sup>18</sup> Mortalities from <sup>10</sup>

## Supplementary table B:

Number of samples obtained from the various countries and the number and percentages of samples that were analysed for *trans* fat (TF)  
 Samples that were not analysed received their TF values from similar products that already have been analysed.

| Country                           | Capital               | All *samples |           |            | Samples with<br><i>trans</i> fat per 100 gram fat < 2% |           |           | Samples with<br><i>trans</i> fat per 100 gram fat ≥2% |           |           |    |
|-----------------------------------|-----------------------|--------------|-----------|------------|--------------------------------------------------------|-----------|-----------|-------------------------------------------------------|-----------|-----------|----|
|                                   |                       | N-all        | N         | % of N-all | N<2%                                                   | N         | % of N<2% | N≥2%                                                  | N         | % of N≥2% |    |
| Armenia                           | Yerevan               | 106          | 106       | 100        | 15                                                     | 15        | 100       | 91                                                    | 91        | 100       |    |
| Belarus                           | Minsk                 | 122          | 122       | 100        | 24                                                     | 24        | 100       | 98                                                    | 98        | 100       |    |
| Tadjikistan                       | Dushanbe              | 176          | 121       | 69         | 40                                                     | 32        | 80        | 136                                                   | 89        | 65        |    |
| Kyrgyzstan                        | Bishkek               | 98           | 98        | 100        | 17                                                     | 17        | 100       | 81                                                    | 81        | 100       |    |
| Azerbaijan                        | Baku                  | 115          | 58        | 50         | 30                                                     | 19        | 63        | 85                                                    | 39        | 46        |    |
| Moldova                           | Chisinau              | 63           | 63        | 100        | 10                                                     | 10        | 100       | 53                                                    | 53        | 100       |    |
| Ukraine                           | Kiev-1                | 106          | 84        | 79         | 23                                                     | 19        | 83        | 83                                                    | 65        | 78        |    |
| <i>Ukraine **</i>                 | <i>Kiev-2</i>         | <i>82</i>    | <i>40</i> | <i>49</i>  | <i>18</i>                                              | <i>7</i>  | <i>39</i> | <i>64</i>                                             | <i>33</i> | <i>52</i> |    |
| Uzbekistan                        | Taskent               | 97           | 63        | 65         | 20                                                     | 12        | 60        | 77                                                    | 51        | 66        |    |
| <i>Uzbekistan **</i>              | <i>Samarkand</i>      | <i>90</i>    | <i>31</i> | <i>34</i>  | <i>27</i>                                              | <i>10</i> | <i>37</i> | <i>63</i>                                             | <i>21</i> | <i>33</i> |    |
| Turkmenistan                      | Ashgabat              | 86           | 56        | 65         | 32                                                     | 28        | 88        | 54                                                    | 28        | 52        |    |
| Georgia                           | Tbilisi               | 58           | 58        | 100        | 11                                                     | 11        | 100       | 47                                                    | 47        | 100       |    |
| Russia                            | Moscow                | 112          | 99        | 88         | 37                                                     | 31        | 84        | 75                                                    | 68        | 91        |    |
| <i>Russia **</i>                  | <i>Sct Petersburg</i> | <i>165</i>   | <i>69</i> | <i>42</i>  | <i>60</i>                                              | <i>20</i> | <i>33</i> | <i>105</i>                                            | <i>49</i> | <i>47</i> |    |
| Kazakhstan                        | Astana                | 67           | 44        | 66         | 17                                                     | 15        | 88        | 50                                                    | 29        | 58        |    |
| Lithuania                         | Vilnius               | 45           | 34        | 76         | 13                                                     | 11        | 85        | 32                                                    | 23        | 72        |    |
| Latvia                            | Riga                  | 36           | 27        | 75         | 12                                                     | 12        | 100       | 24                                                    | 15        | 63        |    |
| Estonia                           | Tallinn               | 45           | 35        | 78         | 37                                                     | 28        | 76        | 8                                                     | 7         | 88        |    |
| 15 countries and 3 extra regions  |                       | 15           | 1669      | 1208       | 72                                                     | 440       | 321       | 73                                                    | 1226      | 887       | 72 |
| countries without 3 extra regions |                       |              | 1332      | 1068       | 80                                                     | 335       | 284       | 85                                                    | 994       | 784       | 79 |

All\* is the number in each country of different packages of biscuits/cakes/wafers that fulfilled the inclusion criteria

\*\* the lines in italic present values for biscuits/cakes/wafers obtained by the same procedure but in extra regions in the same country

STROBE Statement—Checklist of items that should be included in reports of *cross-sectional studies*

Manuscript ID bmjopen-2018-023184 entitled "Industrially produced trans fat in popular foods in 2015-2016 in 15 countries of the former Soviet Union: a market basket investigation  
12-9-2018

|                              | Item No | Recommendation                                                                                                                                                                                                                                                                                                                                                                                                                                                  |
|------------------------------|---------|-----------------------------------------------------------------------------------------------------------------------------------------------------------------------------------------------------------------------------------------------------------------------------------------------------------------------------------------------------------------------------------------------------------------------------------------------------------------|
| <b>I Title and abstract</b>  | 1       | (a) Indicate the study's design with a commonly used term in the title or the abstract <b>line 5</b><br>(b) Provide in the abstract an informative and balanced summary of what was done and what was found <b>Lines 26-37</b>                                                                                                                                                                                                                                  |
| <b>Introduction</b>          |         |                                                                                                                                                                                                                                                                                                                                                                                                                                                                 |
| Background/rationale         | 2       | Explain the scientific background and rationale for the investigation being reported <b>Lines 68-79</b>                                                                                                                                                                                                                                                                                                                                                         |
| Objectives                   | 3       | State specific objectives, including any prespecified hypotheses <b>Lines 102-103</b>                                                                                                                                                                                                                                                                                                                                                                           |
| <b>Methods</b>               |         |                                                                                                                                                                                                                                                                                                                                                                                                                                                                 |
| Study design                 | 4       | Present key elements of study design early in the paper <b>Lines 107-120</b>                                                                                                                                                                                                                                                                                                                                                                                    |
| Setting                      | 5       | Describe the setting, locations, and relevant dates, including periods of recruitment, exposure, follow-up, and data collection <b>Supplementary table A</b>                                                                                                                                                                                                                                                                                                    |
| Participants                 | 6       | (a) Give the eligibility criteria, and the sources and methods of selection of participants <b>Lines 107-120</b>                                                                                                                                                                                                                                                                                                                                                |
| Variables                    | 7       | Clearly define all outcomes, exposures, predictors, potential confounders, and effect modifiers. Give diagnostic criteria, if applicable <b>Lines 145-166</b>                                                                                                                                                                                                                                                                                                   |
| Data sources/<br>measurement | 8*      | For each variable of interest, give sources of data and details of methods of assessment (measurement). Describe comparability of assessment methods if there is more than one group <b>Lines 145-151</b>                                                                                                                                                                                                                                                       |
| Bias                         | 9       | Describe any efforts to address potential sources of bias <b>Lines 157-166</b>                                                                                                                                                                                                                                                                                                                                                                                  |
| Study size                   | 10      | Explain how the study size was arrived at <b>Lines 22-25</b>                                                                                                                                                                                                                                                                                                                                                                                                    |
| Quantitative variables       | 11      | Explain how quantitative variables were handled in the analyses. If applicable, describe which groupings were chosen and why <b>Line 31</b>                                                                                                                                                                                                                                                                                                                     |
| Statistical methods          | 12      | (a) Describe all statistical methods, including those used to control for confounding <b>Lines 172-174</b><br>(b) Describe any methods used to examine subgroups and interactions <b>NA</b><br>(c) Explain how missing data were addressed <b>Lines 138-144, Supplementary table B</b><br>(d) If applicable, describe analytical methods taking account of sampling strategy <b>Lines 145-151</b><br>(e) Describe any sensitivity analyses <b>Lines 130-135</b> |
| <b>Results</b>               |         |                                                                                                                                                                                                                                                                                                                                                                                                                                                                 |
| Participants                 | 13*     | (a) Report numbers of individuals at each stage of study—eg numbers potentially eligible, examined for eligibility, confirmed eligible, included in the study, completing follow-up, and analysed <b>Table 1</b><br>(b) Give reasons for non-participation at each stage <b>NA</b><br>(c) Consider use of a flow diagram <b>NA</b>                                                                                                                              |
| Descriptive data             | 14*     | (a) Give characteristics of study participants (eg demographic, clinical, social) and information on exposures and potential confounders <b>Lines 107-120</b><br>(b) Indicate number of participants with missing data for each variable of interest                                                                                                                                                                                                            |

**Supplementary table B**

|                          |     |                                                                                                                                                                                                                                                                                                                                                                                                                                                  |
|--------------------------|-----|--------------------------------------------------------------------------------------------------------------------------------------------------------------------------------------------------------------------------------------------------------------------------------------------------------------------------------------------------------------------------------------------------------------------------------------------------|
| Outcome data             | 15* | Report numbers of outcome events or summary measures <b>Figure 1 and Table 1</b>                                                                                                                                                                                                                                                                                                                                                                 |
| Main results             | 16  | (a) Give unadjusted estimates and, if applicable, confounder-adjusted estimates and their precision (eg, 95% confidence interval). Make clear which confounders were adjusted for and why they were included <b>NA</b><br>(b) Report category boundaries when continuous variables were categorized <b>Line 31</b><br>(c) If relevant, consider translating estimates of relative risk into absolute risk for a meaningful time period <b>NA</b> |
| Other analyses           | 17  | Report other analyses done—eg analyses of subgroups and interactions, and sensitivity analyses <b>Lines 212-221</b>                                                                                                                                                                                                                                                                                                                              |
| <b>Discussion</b>        |     |                                                                                                                                                                                                                                                                                                                                                                                                                                                  |
| Key results              | 18  | Summarise key results with reference to study objectives <b>Lines 231-238</b>                                                                                                                                                                                                                                                                                                                                                                    |
| Limitations              | 19  | Discuss limitations of the study, taking into account sources of potential bias or imprecision. Discuss both direction and magnitude of any potential bias <b>Lines 271-282</b>                                                                                                                                                                                                                                                                  |
| Interpretation           | 20  | Give a cautious overall interpretation of results considering objectives, limitations, multiplicity of analyses, results from similar studies, and other relevant evidence <b>Lines 320-322</b>                                                                                                                                                                                                                                                  |
| Generalisability         | 21  | Discuss the generalisability (external validity) of the study results <b>Lines 260-268</b>                                                                                                                                                                                                                                                                                                                                                       |
| <b>Other information</b> |     |                                                                                                                                                                                                                                                                                                                                                                                                                                                  |
| Funding                  | 22  | Give the source of funding and the role of the funders for the present study and, if applicable, for the original study on which the present article is based <b>Lines 434-435</b>                                                                                                                                                                                                                                                               |

\*Give information separately for exposed and unexposed groups.

**Note:** An Explanation and Elaboration article discusses each checklist item and gives methodological background and published examples of transparent reporting. The STROBE checklist is best used in conjunction with this article (freely available on the Web sites of PLoS Medicine at <http://www.plosmedicine.org/>, Annals of Internal Medicine at <http://www.annals.org/>, and Epidemiology at <http://www.epidem.com/>). Information on the STROBE Initiative is available at [www.strobe-statement.org](http://www.strobe-statement.org).
