# Supplementary material for: Industrially produced trans fat in popular foods in 15 countries of the former Soviet Union from 2015 to 2016: a market basket investigation
Source: PubMed Central journal article supplement — BMJ Open. 2019 Feb 15;9(2):e023184. doi: 10.1136/bmjopen-2018-023184 (PMC6398766; doi:10.1136/bmjopen-2018-023184), 2019-02-15
Supplement: bmjopen-2018-023184supp001.pdf [file bmjopen-2018-023184supp001.pdf]

**Supplementary table A**

Names and population of the countries of the former Soviet Union and the mortalities of coronary heart disease(CHD) and cardiovascular disease (CVD)

| Country             | Capital  | Visit<br>Month | Visit<br>Year | Capital<br>population<br>millions* | Country<br>population<br>millions* | Year | CHD-mortality       |                       | CVD-mortality       |                       |     |
|---------------------|----------|----------------|---------------|------------------------------------|------------------------------------|------|---------------------|-----------------------|---------------------|-----------------------|-----|
|                     |          |                |               |                                    |                                    |      | male<br>per 100.000 | female<br>per 100.000 | male<br>per 100.000 | female<br>per 100.000 |     |
| Republic of Moldova | Chisinau | Jan            | 2015          | 0.669                              | 3.6                                | 2014 | 528                 | 790                   | 2012                | 365                   | 564 |
| Belarus             | Minsk    | Feb            | 2015          | 1.893                              | 9.5                                | 2016 | 642                 | 893                   | 2009                | 284                   | 428 |
| Georgia             | Tiblisi  | Jun            | 2015          | 1.173                              | 3.7                                | 2016 | 80                  | 325                   | 2010                | 39                    | 190 |
| Armenia             | Yerevan  | Jul            | 2015          | 1.06                               | 3.0                                | 2016 | 352                 | 525                   | 2012                | 211                   | 357 |
| Kyrgyzstan          | Bishkek  | Oct            | 2015          | 0.871                              | 5.5                                | 2009 | 534                 | 842                   | 2010                | 373                   | 588 |
| Kazakhstan          | Astana   | Jan            | 2016          | 0.639                              | 17.7                               | 2016 | 265                 | 810                   | 2010                | 124                   | 485 |
| Uzbekistan          | Taskent  | Jan            | 2016          | 2.31                               | 31.6                               | 2016 | 454                 | 858                   | 2005                | 321                   | 662 |
| Tajikistan          | Dushanbe | Mar            | 2016          | 0.779                              | 8.6                                | 2015 | 304                 | 710                   | 2004                | 186                   | 504 |
| Turkmenistan        | Ashgabat | Apr            | 2016          | 1.031                              | 6.7                                | 2011 | 563                 | 1017                  | 1998                | 333                   | 717 |
| Estonia             | Tallinn  | Feb            | 2016          | 0.444                              | 1.3                                | 2016 | 256                 | 501                   | 2012                | 118                   | 269 |
| Latvia              | Riga     | Jul            | 2016          | 0.43                               | 2.0                                | 2014 | 355                 | 655                   | 2012                | 174                   | 353 |
| Lithuania           | Vilnius  | Jul            | 2016          | 0.537                              | 2.9                                | 2016 | 436                 | 667                   | 2010                | 239                   | 383 |
| Azerbaijan          | Baku     | jul            | 2016          | 2.182                              | 9.8                                | 2016 | 149                 | 617                   | 2007                | 93                    | 489 |
| Ukraine             | Kiev     | Sep            | 2016          | 2.847                              | 42.5                               | 2013 | 600                 | 873                   | 2012                | 356                   | 533 |
| Russian Federation  | Moscow   | Nov            | 2015          | 13.197                             | 146.7                              | 2016 | 501                 | 915                   | 2010                | 255                   | 517 |
| UK                  |          |                |               |                                    |                                    |      | 111                 | 205                   | 2010                | 49                    | 129 |
| Denmark             |          |                |               |                                    |                                    |      | 67                  | 174                   | 2011                | 33                    | 111 |

\* Values from Wikipedia.<sup>18</sup> Mortalities from <sup>10</sup>

**Supplementary table B:**

Number of samples obtained from the various countries and the number and percentages of samples that were analysed for *trans* fat (TF)  
 Samples that were not analysed received their TF values from similar products that already have been analysed.

| Country                           | Capital               | All *samples |                 |            | Samples with<br><i>trans</i> fat per 100 gram fat < 2% |                 |           | Samples with<br><i>trans</i> fat per 100 gram fat ≥2% |                 |           |    |
|-----------------------------------|-----------------------|--------------|-----------------|------------|--------------------------------------------------------|-----------------|-----------|-------------------------------------------------------|-----------------|-----------|----|
|                                   |                       | N-all        | Analysed for TF |            | N<2%                                                   | Analysed for TF |           | N≥2%                                                  | Analysed for TF |           |    |
|                                   |                       |              | N               | % of N-all |                                                        | N               | % of N<2% |                                                       | N               | % of N≥2% |    |
| Armenia                           | Yerevan               | 106          | 106             | 100        | 15                                                     | 15              | 100       | 91                                                    | 91              | 100       |    |
| Belarus                           | Minsk                 | 122          | 122             | 100        | 24                                                     | 24              | 100       | 98                                                    | 98              | 100       |    |
| Tadjikistan                       | Dushanbe              | 176          | 121             | 69         | 40                                                     | 32              | 80        | 136                                                   | 89              | 65        |    |
| Kyrgyzstan                        | Bishkek               | 98           | 98              | 100        | 17                                                     | 17              | 100       | 81                                                    | 81              | 100       |    |
| Azerbaijan                        | Baku                  | 115          | 58              | 50         | 30                                                     | 19              | 63        | 85                                                    | 39              | 46        |    |
| Moldova                           | Chisinau              | 63           | 63              | 100        | 10                                                     | 10              | 100       | 53                                                    | 53              | 100       |    |
| Ukraine                           | Kiev-1                | 106          | 84              | 79         | 23                                                     | 19              | 83        | 83                                                    | 65              | 78        |    |
| <i>Ukraine **</i>                 | <i>Kiev-2</i>         | <i>82</i>    | <i>40</i>       | <i>49</i>  | <i>18</i>                                              | <i>7</i>        | <i>39</i> | <i>64</i>                                             | <i>33</i>       | <i>52</i> |    |
| Uzbekistan                        | Taskent               | 97           | 63              | 65         | 20                                                     | 12              | 60        | 77                                                    | 51              | 66        |    |
| <i>Uzbekistan **</i>              | <i>Samarkand</i>      | <i>90</i>    | <i>31</i>       | <i>34</i>  | <i>27</i>                                              | <i>10</i>       | <i>37</i> | <i>63</i>                                             | <i>21</i>       | <i>33</i> |    |
| Turkmenistan                      | Ashgabat              | 86           | 56              | 65         | 32                                                     | 28              | 88        | 54                                                    | 28              | 52        |    |
| Georgia                           | Tiblisi               | 58           | 58              | 100        | 11                                                     | 11              | 100       | 47                                                    | 47              | 100       |    |
| Russia                            | Moscow                | 112          | 99              | 88         | 37                                                     | 31              | 84        | 75                                                    | 68              | 91        |    |
| <i>Russia **</i>                  | <i>Sct Petersburg</i> | <i>165</i>   | <i>69</i>       | <i>42</i>  | <i>60</i>                                              | <i>20</i>       | <i>33</i> | <i>105</i>                                            | <i>49</i>       | <i>47</i> |    |
| Kazakhstan                        | Astana                | 67           | 44              | 66         | 17                                                     | 15              | 88        | 50                                                    | 29              | 58        |    |
| Lithuania                         | Vilnius               | 45           | 34              | 76         | 13                                                     | 11              | 85        | 32                                                    | 23              | 72        |    |
| Latvia                            | Riga                  | 36           | 27              | 75         | 12                                                     | 12              | 100       | 24                                                    | 15              | 63        |    |
| Estonia                           | Tallinn               | 45           | 35              | 78         | 37                                                     | 28              | 76        | 8                                                     | 7               | 88        |    |
| 15 countries and 3 extra regions  |                       | 15           | 1669            | 1208       | 72                                                     | 440             | 321       | 73                                                    | 1226            | 887       | 72 |
| countries without 3 extra regions |                       |              | 1332            | 1068       | 80                                                     | 335             | 284       | 85                                                    | 994             | 784       | 79 |

All\* is the number in each country of different packages of biscuits/cakes/wafers that fulfilled the inclusion criteria

\*\* the lines in italic present values for biscuits/cakes/wafers obtained by the same procedure but in extra regions in the same country
